# Supplementary material for: Deciphering the Genetic Crosstalk between Microglia and Oligodendrocyte Precursor Cells during Demyelination and Remyelination Using Transcriptomic Data
Source: MDPI journal article supplement (doi:10.3390/ijms232314868), 2022-11-28
Supplement: s1 [file s1]

### Figure S1

### DEGs in CC in 4-week-cuprizone treated and control mice

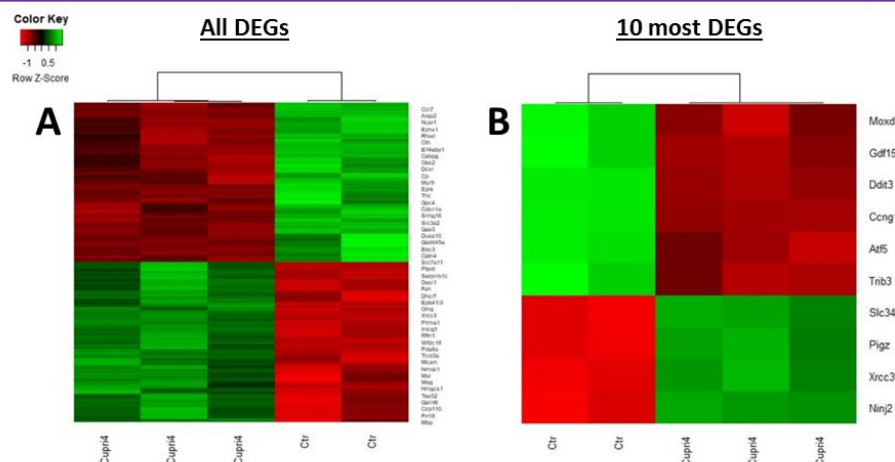

### DEGs in microglia in 4-week-cuprizone treated and control mice

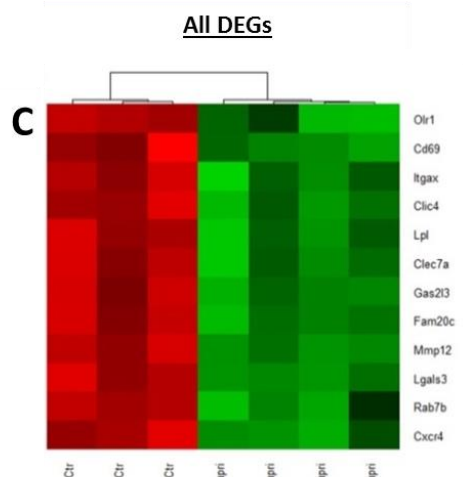

### DEGs in OPCs in 4-week-cuprizone treated and control mice

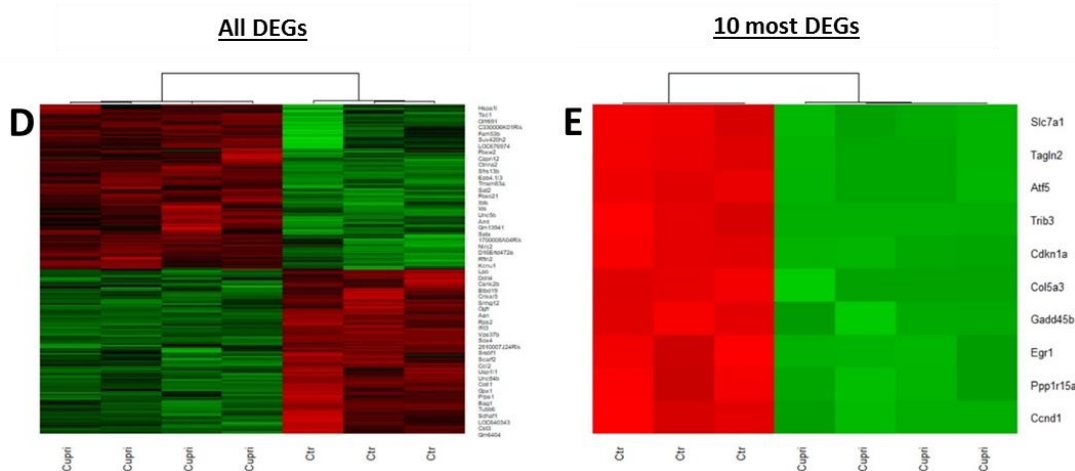

**Figure S1.** Sample clustering by expression of differentially expressed genes (DEGs) in *corpus callosum* (CC), microglia and oligodendrocyte progenitor cells (OPCs) samples of control mice and 4-week cuprizone-treated mice. Heatmap and hierarchical clustering were performed with the normalized and filtered expression data, using all DEGs and the 10 most DEGs. Color key indicates the relative expression level of genes across all samples: red color represents an expression level below mean, green color represents expression higher than the mean. (A-B) Analysis of CC samples and DEGs. (C) Analysis of microglia samples and DEGs. (D-E) Analysis of OPCs samples and DEGs.

**Figure S2**

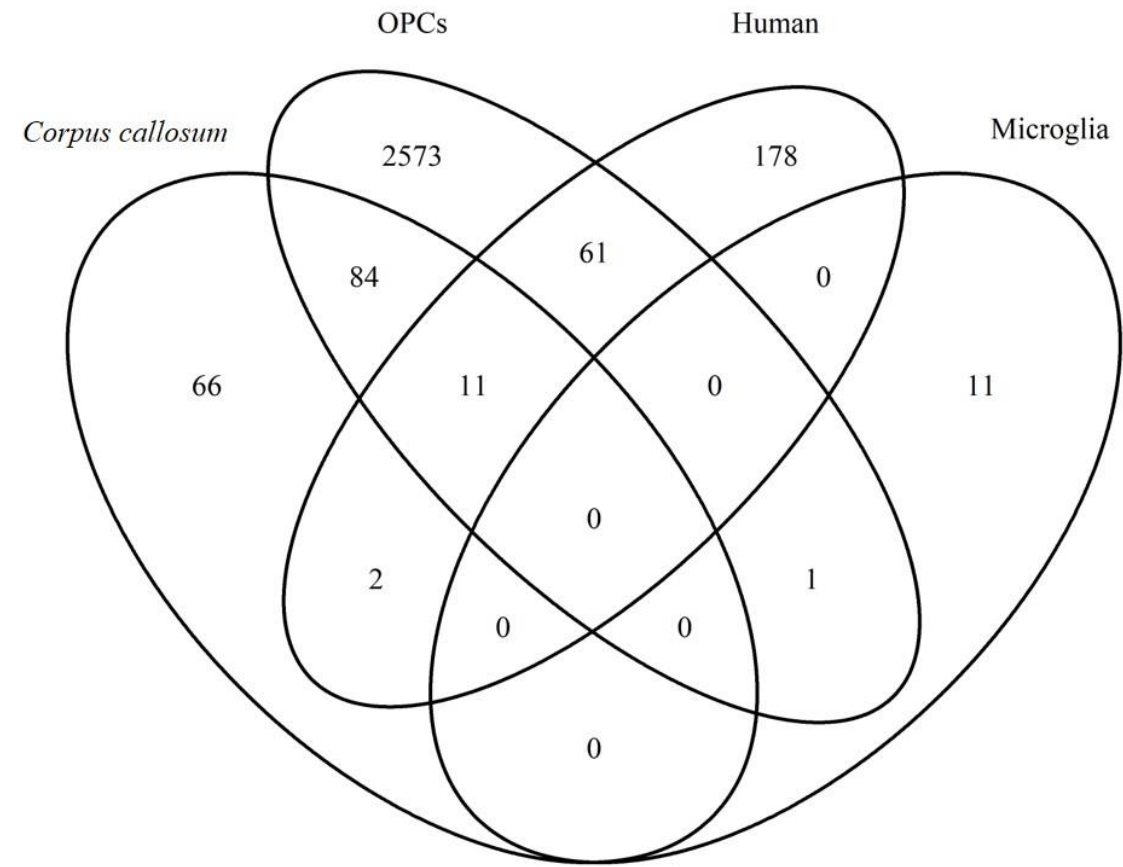

**Figure S2.** Common differentially expressed genes (DEGs) identified in white matter from multiple sclerosis (MS) samples and in corpus callosum (CC), microglia and oligodendrocyte progenitor cell (OPCs) samples from mice. Venn's diagram showing the number of common DEGs. Samples from CC and microglia were obtained after a 4-week treatment with cuprizone, while OPC samples were collected after a 5-week cuprizone treatment.

## Supplementary Tables

**Table S1.** GEO studies using brain samples/cells from control and cuprizone-treated mice, and GEO studies using white matter samples from multiple sclerosis and control patients, where gene expression was analyzed with microarrays.

| GEO Study | Platform                                    | Cell type/brain region                                                                      | Length of cuprizone treatment | Remyelination                                        | Number of samples in control group | Number of samples in treatment/ MS group |
|-----------|---------------------------------------------|---------------------------------------------------------------------------------------------|-------------------------------|------------------------------------------------------|------------------------------------|------------------------------------------|
| GSE100663 | Agilent wholemouse 4x44k                    | Mice corpus callosum                                                                        | 2/4 weeks                     | 4 weeks of cuprizone treatment + 14 days normal diet | 3                                  | 3 (2 weeks)/4 (4 weeks)                  |
| GSE84113  | Affymetrix Mouse Gene 1.0 ST                | Mice microglia                                                                              | 4 weeks                       | ---                                                  | 2                                  | 3                                        |
| GSE66926  | Affymetrix Mouse Gene 1.0 ST                | Mice microglia                                                                              | 4 weeks                       | ---                                                  | 1                                  | 1                                        |
| GSE48872  | Agilent whole mouse 4x44k                   | Mice OPCs                                                                                   | 5 weeks                       | ---                                                  | 3                                  | 4                                        |
| GSE38010  | Affymetrix Human Genome U133 Plus 2.0 Array | Brain lesions from MS patients and white matter from healthy controls                       | ---                           | ---                                                  | 2                                  | 5                                        |
| GSE52139  | Affymetrix Human Genome U133 Plus 2.0 Array | Spinal cord periplaque samples and normal appearing white matter (control) from MS patients | ---                           | ---                                                  | 8                                  | 8                                        |

**Table S2.** Differentially expressed genes in *corpus callosum* of mice treated with cuprizone for 2 weeks compared to control.

| Symbol        | Gene Name                                                                     | Log2 fold change | p-value  | Adjusted p-value |
|---------------|-------------------------------------------------------------------------------|------------------|----------|------------------|
| Cdkn1a        | cyclin-dependent kinase inhibitor1A (P21)                                     | -4.32            | 1.89E-07 | 4.55E-03         |
| Trib3         | tribbles pseudokinase 3                                                       | -4.64            | 1.11E-06 | 1.34E-02         |
| Gdf15         | growth differentiation factor 15                                              | -4.3             | 2.79E-06 | 1.63E-02         |
| Pigz          | phosphatidylinositol glycan anchorbiosynthesis, class Z                       | 3.1              | 2.98E-06 | 1.63E-02         |
| Tgm1          | transglutaminase 1, K polypeptide                                             | -3.13            | 3.43E-06 | 1.63E-02         |
| B230206H07Rik | RIKEN cDNA B230206H07 gene                                                    | 3.46             | 4.86E-06 | 1.63E-02         |
| Ninj2         | ninjurin 2                                                                    | 3.22             | 5.13E-06 | 1.63E-02         |
| Eif4ebp1      | eukaryotic translation initiationfactor 4E binding protein 1                  | -2.31            | 5.88E-06 | 1.63E-02         |
| Slc34a3       | solute carrier family 34 (sodiumphosphate), member 3                          | 3.19             | 6.11E-06 | 1.63E-02         |
| Atf5          | activating transcription factor 5                                             | -2.92            | 8.27E-06 | 1.89E-02         |
| Sesn2         | sestrin 2                                                                     | -2.07            | 9.95E-06 | 1.89E-02         |
| Cacna2d4      | calcium channel, voltage-dependent, alpha 2/delta subunit 4                   | 3.16             | 1.06E-05 | 1.89E-02         |
| Tmprss5       | transmembrane protease, serine 5(spinesin)                                    | 2.79             | 1.08E-05 | 1.89E-02         |
| Xrcc3         | X-ray repair complementingdefective repair in Chinese hamster cells 3         | 2.77             | 1.13E-05 | 1.89E-02         |
| Gjc2          | gap junction protein, gamma 2                                                 | 3.2              | 1.25E-05 | 1.89E-02         |
| Serpinb1a     | serine (or cysteine) peptidaseinhibitor, clade B, member 1a                   | 2.42             | 1.26E-05 | 1.89E-02         |
| Carns1        | carnosine synthase 1                                                          | 2.58             | 1.52E-05 | 2.00E-02         |
| Ppp1r14a      | protein phosphatase 1, regulatoryinhibitor subunit 14A                        | 4.29             | 1.60E-05 | 2.00E-02         |
| Ldlr          | low density lipoprotein receptor                                              | 2.33             | 1.81E-05 | 2.00E-02         |
| Ccng1         | cyclin G1                                                                     | -1.9             | 1.81E-05 | 2.00E-02         |
| Muc11         | mucin-like 1                                                                  | 2.41             | 1.90E-05 | 2.00E-02         |
| Tmem125       | transmembrane protein 125                                                     | 4.25             | 1.88E-05 | 2.00E-02         |
| Wfdc18        | WAP four-disulfide core domain18                                              | 1.93             | 1.95E-05 | 2.00E-02         |
| Atf3          | activating transcription factor 3                                             | -2.17            | 2.23E-05 | 2.00E-02         |
| Nupr1         | nuclear protein transcriptionregulator 1                                      | -2.8             | 2.26E-05 | 2.00E-02         |
| Maff          | v-maf musculoaponeurotic fibrosarcoma oncogene family, protein F (avian)      | -2.75            | 2.29E-05 | 2.00E-02         |
| Moxd1         | monooxygenase, DBH-like 1                                                     | -2.51            | 2.33E-05 | 2.00E-02         |
| Cebpd         | CCAAT/enhancer binding protein(C/EBP), delta                                  | -1.96            | 2.37E-05 | 2.00E-02         |
| Wfdc18        | WAP four-disulfide core domain18                                              | 2                | 2.42E-05 | 2.00E-02         |
| Tubb6         | tubulin, beta 6 class V                                                       | -2.07            | 2.75E-05 | 2.20E-02         |
| Klf4          | Kruppel-like factor 4 (gut)                                                   | -1.81            | 3.07E-05 | 2.34E-02         |
| Smtnl2        | smoothelin-like 2                                                             | 3.19             | 3.26E-05 | 2.34E-02         |
| Adssl1        | adenylosuccinate synthetase like 1                                            | 2.23             | 3.31E-05 | 2.34E-02         |
| Fkbp5         | FK506 binding protein 5                                                       | -1.94            | 3.31E-05 | 2.34E-02         |
| Sgk2          | serum/glucocorticoid regulated kinase 2                                       | 3.93             | 3.46E-05 | 2.38E-02         |
| Rtkn2         | rhotekin 2                                                                    | 2.23             | 3.79E-05 | 2.53E-02         |
| Rab37         | RAB37, member RAS oncogene family                                             | 2.18             | 4.38E-05 | 2.66E-02         |
| Enpp2         | ectonucleotide pyrophosphatase/phosphodiesterase 2                            | 1.94             | 4.57E-05 | 2.66E-02         |
| Ccp110        | centriolar coiled coil protein 110                                            | 2.17             | 4.58E-05 | 2.66E-02         |
| Klk6          | kallikrein related-peptidase 6                                                | 4.47             | 4.59E-05 | 2.66E-02         |
| Hmgcs1        | 3-hydroxy-3-methylglutaryl-Coenzyme A synthase 1                              | 1.81             | 4.64E-05 | 2.66E-02         |
| Serpinb1c     | serine (or cysteine) peptidase inhibitor, clade B, member 1c                  | 2.17             | 4.88E-05 | 2.73E-02         |
| Slc7a5        | solute carrier family 7 (cationic amino acid transporter, y+ system),member 5 | -1.88            | 5.11E-05 | 2.79E-02         |
| Gamt          | guanidinoacetate methyltransferase                                            | 2.79             | 5.35E-05 | 2.81E-02         |
| NmrA1         | NmrA-like family domain containing 1                                          | 2.22             | 5.38E-05 | 2.81E-02         |
| Eda2r         | ectodysplasin A2 receptor                                                     | -2.45            | 5.73E-05 | 2.90E-02         |
| Lctf          | lactase-like                                                                  | 2.93             | 5.88E-05 | 2.90E-02         |
| Slc17a6       | solute carrier family 17 (sodium-                                             | 1.7              | 5.90E-05 | 2.90E-02         |

|           |                                                                                            |       |          |          |
|-----------|--------------------------------------------------------------------------------------------|-------|----------|----------|
|           | dependent inorganic phosphate cotransporter), member 6                                     |       |          |          |
| Arrdc4    | arrestin domain containing 4                                                               | -1.93 | 6.31E-05 | 2.97E-02 |
| Ddit3     | DNA-damage inducible transcript 3                                                          | -1.62 | 6.36E-05 | 2.97E-02 |
| Gal3st1   | galactose-3-O-sulfotransferase 1                                                           | 2.49  | 6.81E-05 | 3.05E-02 |
| Osmr      | oncostatin M receptor                                                                      | -1.52 | 6.84E-05 | 3.05E-02 |
| Fndc11    | fibronectin type III domain containing 11                                                  | 1.72  | 7.33E-05 | 3.15E-02 |
| Bcl6      | B cell leukemia/lymphoma 6                                                                 | -1.51 | 7.93E-05 | 3.25E-02 |
| Plekhg1   | pleckstrin homology domain containing, family G (with RhoGef domain) member 1              | 1.6   | 7.94E-05 | 3.25E-02 |
| Map3k6    | mitogen-activated protein kinase kinase 6                                                  | -1.77 | 7.96E-05 | 3.25E-02 |
| Gtse1     | G two S phase expressed protein 1                                                          | -1.71 | 8.34E-05 | 3.27E-02 |
| Cebpb     | CCAAT/enhancer binding protein (C/EBP), beta                                               | -1.51 | 8.38E-05 | 3.27E-02 |
| Nes       | nestin                                                                                     | -1.69 | 1.02E-04 | 3.80E-02 |
| Hmox1     | heme oxygenase 1                                                                           | -1.77 | 1.02E-04 | 3.80E-02 |
| Mast4     | microtubule associated serine/threonine kinase family member 4                             | 1.55  | 1.03E-04 | 3.80E-02 |
| Runx1     | runt related transcription factor 1                                                        | -1.62 | 1.05E-04 | 3.80E-02 |
| Nectin4   | nectin cell adhesion molecule 4                                                            | 2.95  | 1.07E-04 | 3.80E-02 |
| Slc7a11   | solute carrier family 7 (cationic amino acid transporter, y+ system), member 11            | -2.01 | 1.09E-04 | 3.80E-02 |
| Fgl1      | fibrinogen-like protein 1                                                                  | -1.46 | 1.11E-04 | 3.80E-02 |
| Pdlim2    | PDZ and LIM domain 2                                                                       | 3.15  | 1.14E-04 | 3.80E-02 |
| Dcaf12l2  | DDB1 and CUL4 associated factor 12-like 2                                                  | -1.57 | 1.15E-04 | 3.80E-02 |
| Gas5      | growth arrest specific 5                                                                   | -1.43 | 1.16E-04 | 3.80E-02 |
| Ifrd1     | interferon-related developmental regulator 1                                               | -1.41 | 1.19E-04 | 3.80E-02 |
| Gpr62     | G protein-coupled receptor 62                                                              | 2.99  | 1.22E-04 | 3.80E-02 |
| Cntn2     | contactin 2                                                                                | 2.41  | 1.22E-04 | 3.80E-02 |
| Pappa     | pregnancy-associated plasma protein A                                                      | -2.27 | 1.23E-04 | 3.80E-02 |
| Serpinb1b | serine (or cysteine) peptidase inhibitor, clade B, member 1b                               | 1.84  | 1.23E-04 | 3.80E-02 |
| Snhg16    | small nucleolar RNA host gene 16                                                           | -1.36 | 1.28E-04 | 3.91E-02 |
| Pcyt2     | phosphate cytidylyltransferase 2, ethanolamine                                             | 1.54  | 1.40E-04 | 4.21E-02 |
| Rps27l    | ribosomal protein S27-like                                                                 | -1.42 | 1.45E-04 | 4.32E-02 |
| Emilin3   | elastin microfibril interfacer 3                                                           | 1.67  | 1.51E-04 | 4.42E-02 |
| Bbc3      | BCL2 binding component 3                                                                   | -1.69 | 1.54E-04 | 4.46E-02 |
| Tmem141   | transmembrane protein 141                                                                  | 1.76  | 1.58E-04 | 4.51E-02 |
| Slc3a2    | solute carrier family 3 (activators of dibasic and neutral amino acid transport), member 2 | -1.4  | 1.60E-04 | 4.51E-02 |
| Prima1    | proline rich membrane anchor 1                                                             | 2.24  | 1.65E-04 | 4.51E-02 |
| Epb41l3   | erythrocyte membrane protein band 4.1 like 3                                               | 1.82  | 1.64E-04 | 4.51E-02 |
| Prr18     | proline rich 18                                                                            | 2.61  | 1.69E-04 | 4.58E-02 |
| Lgals2    | lectin, galactose-binding, soluble 2                                                       | 1.81  | 1.76E-04 | 4.65E-02 |
| Arid5a    | AT rich interactive domain 5A (MRF1-like)                                                  | -1.97 | 1.78E-04 | 4.65E-02 |
| Hid1      | HID1 domain containing                                                                     | 1.55  | 1.81E-04 | 4.68E-02 |
| Nfil3     | nuclear factor, interleukin 3, regulated                                                   | -1.32 | 1.83E-04 | 4.68E-02 |
| Scgb3a1   | secretoglobin, family 3A, member 1                                                         | -1.57 | 1.87E-04 | 4.68E-02 |
| Pde8a     | phosphodiesterase 8A                                                                       | 2.26  | 1.92E-04 | 4.68E-02 |
| Tnc       | tenascin C                                                                                 | -2.06 | 1.93E-04 | 4.68E-02 |
| Il12rb1   | interleukin 12 receptor, beta 1                                                            | 2.63  | 1.95E-04 | 4.68E-02 |
| Lgi3      | leucine-rich repeat LGI family, member 3                                                   | 2.18  | 1.96E-04 | 4.68E-02 |
| Mobp      | myelin-associated oligodendrocytic                                                         | 2.5   | 1.98E-04 | 4.68E-02 |

|               |                                                 |       |          |          |
|---------------|-------------------------------------------------|-------|----------|----------|
|               | basic protein                                   |       |          |          |
| Sspo          | SCO-spondin                                     | 2.69  | 1.98E-04 | 4.68E-02 |
| 5033421B08Rik | RIKEN cDNA 5033421B08 gene                      | 2.04  | 2.02E-04 | 4.73E-02 |
| Srd5a1        | steroid 5 alpha-reductase 1                     | 1.54  | 2.09E-04 | 4.84E-02 |
| Galnt6        | polypeptide N-acetylgalactosaminyltransferase 6 | 2.22  | 2.18E-04 | 4.87E-02 |
| Prkcq         | protein kinase C, theta                         | 1.62  | 2.20E-04 | 4.87E-02 |
| Aoc1          | amine oxidase, copper-containing 1              | 1.96  | 2.22E-04 | 4.87E-02 |
| 1110038B12Rik | RIKEN cDNA 1110038B12 gene                      | -1.33 | 2.25E-04 | 4.87E-02 |
| Cables1       | CDK5 and Abl enzyme substrate 1                 | -1.6  | 2.27E-04 | 4.87E-02 |
| Fdps          | farnesyl diphosphate synthetase                 | 1.34  | 2.29E-04 | 4.87E-02 |
| Mt2           | metallothionein 2                               | -1.43 | 2.31E-04 | 4.87E-02 |
| Sh3gl3        | SH3-domain GRB2-like 3                          | 1.65  | 2.31E-04 | 4.87E-02 |
| Depdc1b       | DEP domain containing 1B                        | 2.25  | 2.38E-04 | 4.87E-02 |
| Fah           | fumarylacetoacetate hydrolase                   | 1.72  | 2.35E-04 | 4.87E-02 |
| Plip          | plasma membrane proteolipid                     | 2.27  | 2.39E-04 | 4.87E-02 |
| Gm4221        | predicted gene 4221                             | 1.92  | 2.39E-04 | 4.87E-02 |

**Table S3.** Differentially expressed genes in *corpus callosum* of mice treated with cuprizone for 4 weeks compared to control.

| Symbol   | Gene name                                                                                  | Log2 fold change | p-value  | Adjusted p-value |
|----------|--------------------------------------------------------------------------------------------|------------------|----------|------------------|
| Gdf15    | growth differentiation factor 15                                                           | -3.86            | 3.37e-07 | 8.51e-03         |
| Pigz     | phosphatidylinositol glycan anchorbiosynthesis, class Z                                    | 2.54             | 1.35e-06 | 1.10e-02         |
| Trib3    | tribbles pseudokinase 3                                                                    | -4.40            | 1.77e-06 | 1.10e-02         |
| Ninj2    | ninjurin 2                                                                                 | 1.92             | 2.01e-06 | 1.10e-02         |
| Ccng1    | cyclin G1                                                                                  | -1.93            | 2.41e-06 | 1.10e-02         |
| Slc34a3  | solute carrier family 34 (sodiumphosphate), member 3                                       | 1.76             | 2.78e-06 | 1.10e-02         |
| Atf5     | activating transcription factor 5                                                          | -3.41            | 3.05e-06 | 1.10e-02         |
| Xrcc3    | X-ray repair complementing defectiverepair in Chinese hamster cells 3                      | 1.91             | 4.10e-06 | 1.29e-02         |
| Ddit3    | DNA-damage inducible transcript 3                                                          | -1.70            | 5.40e-06 | 1.51e-02         |
| Moxd1    | monooxygenase, DBH-like 1                                                                  | -2.59            | 7.51e-06 | 1.60e-02         |
| Eda2r    | ectodysplasin A2 receptor                                                                  | -1.12            | 7.61e-06 | 1.60e-02         |
| Smtnl2   | smoothelin-like 2                                                                          | 1.65             | 8.68e-06 | 1.69e-02         |
| Ppp1r14a | protein phosphatase 1, regulatoryinhibitor subunit 14A                                     | 3.67             | 9.42e-06 | 1.70e-02         |
| Sesn2    | sestrin 2                                                                                  | -2.20            | 1.05e-05 | 1.74e-02         |
| Cdkn1a   | cyclin-dependent kinase inhibitor 1A(P21)                                                  | -3.72            | 1.13e-05 | 1.74e-02         |
| Tmem125  | transmembrane protein 125                                                                  | 3.46             | 1.21e-05 | 1.74e-02         |
| Nat8     | N-acetyltransferase 8 (GCN5-related)                                                       | -1.57            | 1.24e-05 | 1.74e-02         |
| Tmprss5  | transmembrane protease, serine 5(spinesin)                                                 | 1.65             | 1.34e-05 | 1.74e-02         |
| Slc7a5   | solute carrier family 7 (cationic amino acid transporter, y+ system), member 5             | -1.73            | 1.38e-05 | 1.74e-02         |
| Wfdc18   | WAP four-disulfide core domain 18                                                          | 1.87             | 1.47e-05 | 1.77e-02         |
| Slc7a11  | solute carrier family 7 (cationic amino acid transporter, y+ system), member 11            | -2.37            | 1.75e-05 | 1.87e-02         |
| Fibin    | fin bud initiation factor homolog (zebrafish)                                              | -1.70            | 1.82e-05 | 1.87e-02         |
| Klf4     | Kruppel-like factor 4 (gut)                                                                | -1.71            | 1.84e-05 | 1.87e-02         |
| Eif4ebp1 | eukaryotic translation initiation factor 4Ebinding protein 1                               | -2.33            | 1.85e-05 | 1.87e-02         |
| Slc3a2   | solute carrier family 3 (activators of dibasic and neutral amino acid transport), member 2 | -1.54            | 1.94e-05 | 1.89e-02         |
| Arap2    | ArfGAP with RhoGAP domain, ankyrin repeat and PH domain 2                                  | -1.39            | 2.08e-05 | 1.95e-02         |
| Gzmm     | granzyme M (lymphocyte met-ase 1)                                                          | -1.60            | 2.20e-05 | 1.98e-02         |
| Sgk2     | serum/glucocorticoid regulated kinase 2                                                    | 2.93             | 2.78e-05 | 2.35e-02         |
| Bbc3     | BCL2 binding component 3                                                                   | -1.77            | 3.04e-05 | 2.35e-02         |
| Pappa    | pregnancy-associated plasma protein A                                                      | -2.02            | 3.26e-05 | 2.35e-02         |

|               |                                                                                              |       |          |          |
|---------------|----------------------------------------------------------------------------------------------|-------|----------|----------|
| Nes           | nestin                                                                                       | -1.85 | 3.28e-05 | 2.35e-02 |
| Gas5          | growth arrest specific 5                                                                     | -1.46 | 3.29e-05 | 2.35e-02 |
| Fdps          | farnesyl diphosphate synthetase                                                              | 1.28  | 3.37e-05 | 2.35e-02 |
| Prima1        | proline rich membrane anchor 1                                                               | 1.25  | 3.40e-05 | 2.35e-02 |
| Serpinb1a     | serine (or cysteine) peptidase inhibitor, clade B, member 1a                                 | 1.98  | 3.59e-05 | 2.35e-02 |
| Rhod          | ras homolog family member D                                                                  | -1.28 | 3.63e-05 | 2.35e-02 |
| Ccl7          | chemokine (C-C motif) ligand 7                                                               | -0.87 | 3.80e-05 | 2.39e-02 |
| Cp            | ceruloplasmin                                                                                | -1.89 | 3.88e-05 | 2.39e-02 |
| Mvd           | mevalonate (diphospho) decarboxylase                                                         | 1.23  | 4.04e-05 | 2.43e-02 |
| Ldlr          | low density lipoprotein receptor                                                             | 1.83  | 4.19e-05 | 2.46e-02 |
| Gjc2          | gap junction protein, gamma 2                                                                | 1.49  | 4.42e-05 | 2.49e-02 |
| Ephx1         | epoxide hydrolase 1, microsomal                                                              | -2.01 | 4.64e-05 | 2.49e-02 |
| Ephx1         | epoxide hydrolase 1, microsomal                                                              | -1.99 | 4.80e-05 | 2.49e-02 |
| B230206H07Rik | RIKEN cDNA B230206H07 gene                                                                   | 1.50  | 4.81e-05 | 2.49e-02 |
| Gtse1         | G two S phase expressed protein 1                                                            | -1.01 | 4.83e-05 | 2.49e-02 |
| Hmgcs1        | 3-hydroxy-3-methylglutaryl-Coenzyme A synthase 1                                             | 1.23  | 4.84e-05 | 2.49e-02 |
| Snhg16        | small nucleolar RNA host gene 16                                                             | -1.25 | 4.93e-05 | 2.49e-02 |
| Galnt6        | polypeptide N-acetylgalactosaminyltransferase 6                                              | 2.72  | 5.88e-05 | 2.79e-02 |
| Gpr62         | G protein-coupled receptor 62                                                                | 2.50  | 5.98e-05 | 2.79e-02 |
| Galnt6        | polypeptide N-acetylgalactosaminyltransferase 6                                              | 1.22  | 6.01e-05 | 2.79e-02 |
| Nupr1         | nuclear protein transcription regulator 1                                                    | -3.63 | 6.02e-05 | 2.79e-02 |
| Adamts1       | a disintegrin-like and metallopeptidase (repolysin type) with thrombospondin type 1 motif, 1 | -1.59 | 6.07e-05 | 2.79e-02 |
| Pcyt2         | phosphate cytidyltransferase 2, ethanolamine                                                 | 1.28  | 6.19e-05 | 2.79e-02 |
| Gadd45b       | growth arrest and DNA-damage-inducible 45 beta                                               | -1.31 | 6.43e-05 | 2.85e-02 |
| Tnc           | tenascin C                                                                                   | -1.71 | 6.56e-05 | 2.86e-02 |
| Scgb3a1       | secretoglobin, family 3A, member 1                                                           | -0.92 | 7.29e-05 | 3.02e-02 |
| Nacad         | NAC alpha domain containing                                                                  | 1.38  | 7.82e-05 | 3.19e-02 |
| Klk6          | kallikrein related-peptidase 6                                                               | 2.91  | 8.19e-05 | 3.27e-02 |
| Tlcd3a        | TLC domain containing 3A                                                                     | 1.01  | 8.97e-05 | 3.47e-02 |
| Tmeff1        | transmembrane protein with EGF-like and two follistatin-like domains 1                       | 1.11  | 9.49e-05 | 3.58e-02 |
| Fbln5         | fibulin 5                                                                                    | -1.34 | 1.04e-04 | 3.77e-02 |
| Dcxr          | dicarbonyl L-xylulose reductase                                                              | -1.37 | 1.06e-04 | 3.77e-02 |
| Mog           | myelin oligodendrocyte glycoprotein                                                          | 2.67  | 1.06e-04 | 3.77e-02 |
| Aen           | apoptosis enhancing nuclease                                                                 | -1.37 | 1.08e-04 | 3.77e-02 |
| Nmral1        | NmrA-like family domain containing 1                                                         | 1.92  | 1.08e-04 | 3.77e-02 |
| Rftn1         | raftlin lipid raft linker 1                                                                  | 1.20  | 1.09e-04 | 3.77e-02 |
| Carns1        | carnosine synthase 1                                                                         | 1.40  | 1.13e-04 | 3.81e-02 |
| Ccp110        | centriolar coiled coil protein 110                                                           | 1.70  | 1.13e-04 | 3.81e-02 |
| Eprs          | glutamyl-prolyl-tRNA synthetase                                                              | -1.11 | 1.15e-04 | 3.82e-02 |
| Nat8f5        | N-acetyltransferase 8 (GCN5-related) family member 5                                         | -1.40 | 1.19e-04 | 3.82e-02 |
| Nkain1        | Na <sup>+</sup> /K <sup>+</sup> transporting ATPase interacting 1                            | 1.65  | 1.20e-04 | 3.82e-02 |
| Fzd1          | frizzled class receptor 1                                                                    | -1.74 | 1.25e-04 | 3.82e-02 |
| Calcr1        | calcitonin receptor-like                                                                     | -1.31 | 1.27e-04 | 3.82e-02 |
| Sox21         | SRY (sex determining region Y)-box 21                                                        | -1.13 | 1.27e-04 | 3.82e-02 |
| Epb41l3       | erythrocyte membrane protein band 4.1 like 3                                                 | 1.44  | 1.28e-04 | 3.82e-02 |
| Pde8a         | phosphodiesterase 8A                                                                         | 1.53  | 1.41e-04 | 4.01e-02 |
| Dusp10        | dual specificity phosphatase 10                                                              | -1.54 | 1.42e-04 | 4.01e-02 |
| Rps27l        | ribosomal protein S27-like                                                                   | -1.64 | 1.43e-04 | 4.01e-02 |
| Tgm1          | transglutaminase 1, K polypeptide                                                            | -3.27 | 1.44e-04 | 4.01e-02 |
| Rhog          | ras homolog family member G                                                                  | 1.12  | 1.45e-04 | 4.01e-02 |
| Arrdc4        | arrestin domain containing 4                                                                 | -1.54 | 1.46e-04 | 4.01e-02 |
| Opalin        | oligodendrocytic myelin paranodal and inner loop protein                                     | 3.02  | 1.48e-04 | 4.03e-02 |
| Pla1a         | phospholipase A1 member A                                                                    | -0.87 | 1.52e-04 | 4.05e-02 |
| Mapk8ip1      | mitogen-activated protein kinase 8 interacting protein 1                                     | 1.49  | 1.52e-04 | 4.05e-02 |
| Arid5a        | AT rich interactive domain 5A (MRF1-like)                                                    | -1.72 | 1.56e-04 | 4.09e-02 |

|           |                                                                          |       |          |          |
|-----------|--------------------------------------------------------------------------|-------|----------|----------|
| Trp53inp1 | transformation related protein 53 inducible nuclear protein 1            | -1.28 | 1.58e-04 | 4.09e-02 |
| Anln      | anillin, actin binding protein                                           | 1.45  | 1.59e-04 | 4.09e-02 |
| Syt12     | synaptotagmin-like 2                                                     | 1.22  | 1.66e-04 | 4.15e-02 |
| Ccl2      | chemokine (C-C motif) ligand 2                                           | -2.41 | 1.66e-04 | 4.15e-02 |
| Gadd45a   | growth arrest and DNA-damage-inducible 45 alpha                          | -1.81 | 1.67e-04 | 4.15e-02 |
| Msmo1     | methylsterol monooxygenase 1                                             | 1.08  | 1.68e-04 | 4.15e-02 |
| Mal       | myelin and lymphocyte protein, T cell differentiation protein            | 2.81  | 1.71e-04 | 4.15e-02 |
| Prr18     | proline rich 18                                                          | 2.21  | 1.71e-04 | 4.15e-02 |
| Synj2     | synaptojanin 2                                                           | 1.37  | 1.73e-04 | 4.15e-02 |
| Ifrd1     | interferon-related developmental regulator 1                             | -1.28 | 1.74e-04 | 4.15e-02 |
| Adssl1    | adenylosuccinate synthetase like 1                                       | 1.81  | 1.78e-04 | 4.17e-02 |
| Kctd15    | potassium channel tetramerisation domain containing 15                   | -1.13 | 1.82e-04 | 4.20e-02 |
| Desi1     | desumoylating isopeptidase 1                                             | 1.52  | 1.83e-04 | 4.20e-02 |
| Ppp1r15a  | protein phosphatase 1, regulatory subunit 15A                            | -1.37 | 1.86e-04 | 4.24e-02 |
| Foxc1     | forkhead box C1                                                          | -1.14 | 1.90e-04 | 4.25e-02 |
| Gal3st1   | galactose-3-O-sulfotransferase 1                                         | 1.77  | 1.91e-04 | 4.25e-02 |
| Cetn4     | centrin 4                                                                | -1.40 | 1.93e-04 | 4.25e-02 |
| Maff      | v-maf musculoaponeurotic fibrosarcoma oncogene family, protein F (avian) | -2.24 | 1.95e-04 | 4.25e-02 |
| Cntn2     | contactin 2                                                              | 1.94  | 1.96e-04 | 4.25e-02 |
| Tmem88b   | transmembrane protein 88B                                                | 2.10  | 1.97e-04 | 4.25e-02 |
| Cdca7     | cell division cycle associated 7                                         | 1.13  | 2.03e-04 | 4.33e-02 |
| Nipal4    | NIPA-like domain containing 4                                            | 1.10  | 2.04e-04 | 4.33e-02 |
| Cth       | cystathionase (cystathionine gamma-lyase)                                | -1.02 | 2.07e-04 | 4.33e-02 |
| Insig1    | insulin induced gene 1                                                   | 0.96  | 2.09e-04 | 4.33e-02 |
| Cdk18     | cyclin-dependent kinase 18                                               | 1.32  | 2.10e-04 | 4.33e-02 |
| Grin2c    | glutamate receptor, ionotropic, NMDA2C (epsilon 3)                       | 1.19  | 2.11e-04 | 4.33e-02 |
| Mgp       | matrix Gla protein                                                       | -1.46 | 2.23e-04 | 4.47e-02 |
| Ptprd     | protein tyrosine phosphatase, receptor type, D                           | 1.49  | 2.24e-04 | 4.47e-02 |
| Lgi3      | leucine-rich repeat LGI family, member 3                                 | 1.76  | 2.25e-04 | 4.47e-02 |
| Poc1a     | POC1 centriolar protein A                                                | 1.10  | 2.30e-04 | 4.47e-02 |
| Oas2      | 2'-5' oligoadenylate synthetase 2                                        | -1.20 | 2.32e-04 | 4.47e-02 |
| Plip      | plasma membrane proteolipid                                              | 1.65  | 2.33e-04 | 4.47e-02 |
| Tor3a     | torsin family 3, member A                                                | -1.37 | 2.33e-04 | 4.47e-02 |
| Mcam      | melanoma cell adhesion molecule                                          | 1.29  | 2.34e-04 | 4.47e-02 |
| Fah       | fumarylacetoacetate hydrolase                                            | 1.30  | 2.36e-04 | 4.47e-02 |
| Lpin3     | lipin 3                                                                  | -0.81 | 2.41e-04 | 4.48e-02 |
| Helt      | helt bHLH transcription factor                                           | 0.78  | 2.49e-04 | 4.56e-02 |
| Gpc4      | glypican 4                                                               | -1.73 | 2.49e-04 | 4.56e-02 |
| Cyb5r1    | cytochrome b5 reductase 1                                                | -1.42 | 2.51e-04 | 4.56e-02 |
| Rgs3      | regulator of G-protein signaling 3                                       | 1.04  | 2.56e-04 | 4.57e-02 |
| Nfil3     | nuclear factor, interleukin 3, regulated                                 | -1.05 | 2.57e-04 | 4.57e-02 |
| Mbp       | myelin basic protein                                                     | 2.20  | 2.60e-04 | 4.59e-02 |
| Dlx2      | distal-less homeobox 2                                                   | 1.21  | 2.81e-04 | 4.84e-02 |
| Dhcr7     | 7-dehydrocholesterol reductase                                           | 1.23  | 2.83e-04 | 4.84e-02 |
| Ldlrad4   | low density lipoprotein receptor class A domain containing 4             | 1.12  | 2.87e-04 | 4.84e-02 |
| Ano4      | anoctamin 4                                                              | 0.86  | 2.88e-04 | 4.84e-02 |
| Cyb5r2    | cytochrome b5 reductase 2                                                | -0.63 | 2.89e-04 | 4.84e-02 |
| Paqr5     | progesterone and adiponectin receptor family member V                    | -1.17 | 2.89e-04 | 4.84e-02 |
| Hfe       | homeostatic iron regulator                                               | -1.41 | 2.90e-04 | 4.84e-02 |
| Sspo      | SCO-spondin                                                              | 1.22  | 2.91e-04 | 4.84e-02 |
| Dcaf12l2  | DDB1 and CUL4 associated factor 12-like 2                                | -1.27 | 2.94e-04 | 4.86e-02 |
| Stard4    | StAR-related lipid transfer (START) domain containing 4                  | 1.23  | 3.02e-04 | 4.92e-02 |
| Zfas1     | zinc finger, NFX1-type containing 1, antisense RNA 1                     | -1.17 | 3.07e-04 | 4.92e-02 |
| Rhbdd1    | rhomboid domain containing 1                                             | -1.12 | 3.12e-04 | 4.92e-02 |
| Nxph4     | neurexophilin 4                                                          | 0.93  | 3.13e-04 | 4.92e-02 |

|               |                                                                              |       |          |          |
|---------------|------------------------------------------------------------------------------|-------|----------|----------|
| Plekhh1       | pleckstrin homology domain containing, family H (with MyTH4 domain) member 1 | 1.86  | 3.13e-04 | 4.92e-02 |
| Tpm1          | tropomyosin 1, alpha                                                         | 0.92  | 3.14e-04 | 4.92e-02 |
| Phlda3        | pleckstrin homology like domain, family A, member 3                          | -1.33 | 3.19e-04 | 4.93e-02 |
| Fndc11        | fibronectin type III domain containing 11                                    | 1.31  | 3.20e-04 | 4.93e-02 |
| Tll7          | tubulin tyrosine ligase-like family, member 7                                | 1.07  | 3.24e-04 | 4.96e-02 |
| Runx1         | runt related transcription factor 1                                          | -1.06 | 3.28e-04 | 4.97e-02 |
| Serpinb1c     | serine (or cysteine) peptidase inhibitor, clade B, member 1c                 | 0.90  | 3.34e-04 | 4.97e-02 |
| Odc1          | ornithine decarboxylase, structural 1                                        | -0.92 | 3.34e-04 | 4.97e-02 |
| Tex52         | testis expressed 52                                                          | 0.91  | 3.35e-04 | 4.97e-02 |
| Adamtsl4      | ADAMTS-like 4                                                                | 0.92  | 3.38e-04 | 4.97e-02 |
| Cerox1        | cytoplasmic endogenous regulator of oxidative phosphorylation 1              | 0.66  | 3.44e-04 | 4.97e-02 |
| Gamt          | guanidinoacetate methyltransferase                                           | 2.33  | 3.44e-04 | 4.97e-02 |
| Rasgrp3       | RAS, guanyl releasing protein 3                                              | 1.08  | 3.48e-04 | 4.97e-02 |
| Myl9          | myosin, light polypeptide 9, regulatory                                      | -1.26 | 3.49e-04 | 4.97e-02 |
| Cebpg         | CCAAT/enhancer binding protein (C/EBP), gamma                                | -1.13 | 3.49e-04 | 4.97e-02 |
| 1110038B12Rik | RIKEN cDNA 1110038B12 gene                                                   | -1.36 | 3.53e-04 | 4.97e-02 |
| Pole4         | polymerase (DNA-directed), epsilon 4 (p12 subunit)                           | -0.95 | 3.58e-04 | 4.97e-02 |
| Cebpb         | CCAAT/enhancer binding protein (C/EBP), beta                                 | -1.33 | 3.59e-04 | 4.97e-02 |
| Abca2         | ATP-binding cassette, sub-family A (ABC1), member 2                          | 1.57  | 3.63e-04 | 4.97e-02 |
| Omg           | oligodendrocyte myelin glycoprotein                                          | 0.92  | 3.63e-04 | 4.97e-02 |
| Aplp1         | amyloid beta (A4) precursor-like protein 1                                   | 1.21  | 3.68e-04 | 4.97e-02 |
| Tppp          | tubulin polymerization promoting protein                                     | 0.94  | 3.68e-04 | 4.97e-02 |
| Tagln         | transgelin                                                                   | -1.76 | 3.73e-04 | 4.97e-02 |
| Mast4         | microtubule associated serine/threonine kinase family member 4               | 1.53  | 3.75e-04 | 4.97e-02 |
| Rasl12        | RAS-like, family 12                                                          | 0.89  | 3.77e-04 | 4.97e-02 |
| Serpinb1c     | serine (or cysteine) peptidase inhibitor, clade B, member 1c                 | 1.65  | 3.77e-04 | 4.97e-02 |

**Table S4.** Differentially expressed genes identified in the microglia obtained from mice treated with cuprizone for 4 weeks compared with microglia obtained from control mice.

| Symbol | Gene name                                        | Log2 fold change | p-value  | Adjusted p-value |
|--------|--------------------------------------------------|------------------|----------|------------------|
| Mmp12  | matrix metalloproteinase 12                      | 2.63             | 3.14E-07 | 5.52E-03         |
| Lgals3 | lectin, galactose binding, soluble 3             | 2.15             | 6.23E-07 | 5.52E-03         |
| Fam20c | family with sequence similarity 20, member C     | 2.22             | 5.16E-06 | 2.73E-02         |
| Gas2l3 | growth arrest-specific 2 like 3                  | 1.54             | 6.17E-06 | 2.73E-02         |
| Cxcr4  | chemokine (C-X-C motif) receptor 4               | 1.35             | 8.77E-06 | 3.11E-02         |
| Clic4  | chloride intracellular channel 4 (mitochondrial) | 1.13             | 1.19E-05 | 3.43E-02         |
| Clec7a | C-type lectin domain family 7, member a          | 2.47             | 1.44E-05 | 3.43E-02         |
| Lpl    | lipoprotein lipase                               | 3.04             | 1.55E-05 | 3.43E-02         |
| Cd69   | CD69 antigen                                     | 1.27             | 1.82E-05 | 3.58E-02         |
| Itgax  | integrin alpha X                                 | 2.74             | 2.52E-05 | 4.34E-02         |

|       |                                                           |          |          |          |
|-------|-----------------------------------------------------------|----------|----------|----------|
| Rab7b | RAB7B, member RAS oncogene family                         | 1.3<br>3 | 2.78E-05 | 4.34E-02 |
| Olr1  | oxidized low density lipoprotein (lectin-like) receptor 1 | 1.8<br>3 | 2.94E-05 | 4.34E-02 |

**Table S5.** Differentially expressed genes identified in the oligodendrocyte progenitor cells obtained from mice treated with cuprizone for 5 weeks compared with oligodendrocyte progenitor cells obtained from control mice. Due to the large number of differentially expressed genes only those with an adjusted p-value<0.001 are presented.

| Symbol    | Gene name                                                                                                                      | Log2 fold change | p-value  | Adjusted p-value |
|-----------|--------------------------------------------------------------------------------------------------------------------------------|------------------|----------|------------------|
| Tagln2    | <i>Mus musculus</i> transgelin 2 (Tagln2), mRNA [NM_178598]                                                                    | 5.16             | 1.79e-12 | 5.74e-08         |
| Atf5      | <i>Mus musculus</i> activating transcription factor 5 (Atf5), transcript variant 1, mRNA [NM_030693]                           | 3.27             | 2.35e-11 | 3.76e-07         |
| Slc7a1    | <i>Mus musculus</i> solute carrier family 7(cationic amino acid transporter, y+ system), member 1 (Slc7a1), mRNA [NM_007513]   | 4.35             | 3.56e-11 | 3.80e-07         |
| Col5a3    | <i>Mus musculus</i> collagen, type V, alpha 3 (Col5a3), mRNA [NM_016919]                                                       | 4.25             | 1.43e-10 | 1.15e-06         |
| Gadd45b   | <i>Mus musculus</i> growth arrest and DNA-damage-inducible 45 beta (Gadd45b), mRNA [NM_008655]                                 | 3.67             | 2.49e-10 | 1.60e-06         |
| Cdkn1a    | <i>Mus musculus</i> cyclin-dependent kinase inhibitor 1A (P21) (Cdkn1a), transcript variant 1, mRNA [NM_007669]                | 5.83             | 4.29e-10 | 2.29e-06         |
| Ccnd1     | <i>Mus musculus</i> cyclin D1 (Ccnd1), mRNA [NM_007631]                                                                        | 3.40             | 5.58e-10 | 2.38e-06         |
| Trib3     | <i>Mus musculus</i> tribbles homolog 3(Drosophila) (Trib3), mRNA [NM_175093]                                                   | 7.23             | 5.93e-10 | 2.38e-06         |
| Ppp1r15a  | <i>Mus musculus</i> protein phosphatase 1, regulatory (inhibitor) subunit 15A (Ppp1r15a), mRNA [NM_008654]                     | 2.96             | 7.51e-10 | 2.67e-06         |
| Egr1      | <i>Mus musculus</i> early growth response 1(Egr1), mRNA [NM_007913]                                                            | 2.49             | 9.52e-10 | 3.05e-06         |
| Nupr1     | <i>Mus musculus</i> nuclear protein 1 (Nupr1), mRNA [NM_019738]                                                                | 4.86             | 1.13e-09 | 3.22e-06         |
| Ltbp4     | <i>Mus musculus</i> latent transforming growthfactor beta binding protein 4 (Ltbp4), transcript variant 1, mRNA [NM_175641]    | 2.73             | 1.21e-09 | 3.22e-06         |
| Bbc3      | <i>Mus musculus</i> BCL2 binding component 3 (Bbc3), mRNA [NM_133234]                                                          | 2.91             | 1.48e-09 | 3.64e-06         |
| Fosb      | <i>Mus musculus</i> FBJ osteosarcomaoncogene B (Fosb), mRNA [NM_008036]                                                        | 2.54             | 3.51e-09 | 6.85e-06         |
| Tubb2b    | <i>Mus musculus</i> tubulin, beta 2B (Tubb2b), mRNA [NM_023716]                                                                | 2.92             | 3.64e-09 | 6.85e-06         |
| Socs3     | <i>Mus musculus</i> suppressor of cytokine signaling 3 (Socs3), mRNA [NM_007707]                                               | 3.16             | 3.85e-09 | 6.85e-06         |
| Vim       | <i>Mus musculus</i> vimentin (Vim), mRNA [NM_011701]                                                                           | 3.44             | 3.21e-09 | 6.85e-06         |
| Sox4      | Transcription factor SOX-4 [Source:UniProtKB/Swiss-Prot;Acc:Q06831] [ENSMUST00000067230]                                       | 3.21             | 3.84e-09 | 6.85e-06         |
| Kctd15    | <i>Mus musculus</i> potassium channel tetramerisation domain containing 15 (Kctd15), mRNA [NM_146188]                          | 2.95             | 5.25e-09 | 8.85e-06         |
| Gadd45g   | <i>Mus musculus</i> growth arrest and DNA- damage-inducible 45 gamma (Gadd45g), mRNA [NM_011817]                               | 4.09             | 6.27e-09 | 1.01e-05         |
| Tnfrsf12a | <i>Mus musculus</i> tumor necrosis factor receptor superfamily, member 12a (Tnfrsf12a), transcript variant 1, mRNA [NM_013749] | 3.42             | 6.65e-09 | 1.01e-05         |
| Asns      | <i>Mus musculus</i> asparagine synthetase (Asns), mRNA [NM_012055]                                                             | 4.47             | 7.35e-09 | 1.07e-05         |
| Hist1h3d  | <i>Mus musculus</i> histone cluster 1, H3d(Hist1h3d), mRNA [NM_178204]                                                         | 1.78             | 8.52e-09 | 1.19e-05         |
| Klf4      | <i>Mus musculus</i> Kruppel-like factor 4 (gut) (Klf4), mRNA [NM_010637]                                                       | 3.07             | 9.31e-09 | 1.24e-05         |

|              |                                                                                                                    |       |          |          |
|--------------|--------------------------------------------------------------------------------------------------------------------|-------|----------|----------|
| Lmo4         | <i>Mus musculus</i> LIM domain only 4 (Lmo4), transcript variant 1, mRNA[NM_010723]                                | 2.61  | 1.06e-08 | 1.35e-05 |
| Tubb2a       | <i>Mus musculus</i> tubulin, beta 2A (Tubb2a), mRNA [NM_009450]                                                    | 2.52  | 1.10e-08 | 1.35e-05 |
| Hmga1        | <i>Mus musculus</i> high mobility group AT-hook 1 (Hmga1), transcript variant 1, mRNA [NM_016660]                  | 2.66  | 1.20e-08 | 1.43e-05 |
| Ptpnz1       | <i>Mus musculus</i> protein tyrosine phosphatase, receptor type Z, polypeptide1 (Ptpnz1), mRNA [NM_001081306]      | 2.62  | 1.41e-08 | 1.52e-05 |
| Gm12260      | PREDICTED: <i>Mus musculus</i> similar to histone H3 (LOC382523), mRNA [XM_905850]                                 | 2.01  | 1.46e-08 | 1.52e-05 |
| Rtn1         | <i>Mus musculus</i> reticulon 1 (Rtn1), transcript variant 1, mRNA [NM_153457]                                     | 3.15  | 1.47e-08 | 1.52e-05 |
| Gm9315       | PREDICTED: <i>Mus musculus</i> predicted gene, EG668714 (EG668714), mRNA [XM_001003263]                            | -3.25 | 1.69e-08 | 1.64e-05 |
| Marcks       | <i>Mus musculus</i> myristoylated alanine rich protein kinase C substrate (Marcks), mRNA [NM_008538]               | 3.84  | 1.79e-08 | 1.68e-05 |
| Nfil3        | <i>Mus musculus</i> nuclear factor, interleukin 3, regulated (Nfil3), mRNA [NM_017373]                             | 2.10  | 1.86e-08 | 1.70e-05 |
| Il33         | <i>Mus musculus</i> interleukin 33 (Il33), transcript variant 1, mRNA [NM_001164724]                               | -1.81 | 2.24e-08 | 1.99e-05 |
| Aen          | <i>Mus musculus</i> apoptosis enhancing nuclease (Aen), transcript variant 1, mRNA [NM_026531]                     | 2.47  | 2.59e-08 | 2.24e-05 |
| Nrcam        | <i>Mus musculus</i> neuron-glia-CAM-related cell adhesion molecule (Nrcam), transcript variant 1, mRNA [NM_176930] | 2.55  | 2.81e-08 | 2.35e-05 |
| Scrg1        | <i>Mus musculus</i> scrapie responsive gene 1 (Scrg1), mRNA [NM_009136]                                            | 2.72  | 2.86e-08 | 2.35e-05 |
| Serpina1a    | <i>Mus musculus</i> serine (or cysteine) peptidase inhibitor, clade B, member 1a (Serpina1a), mRNA [NM_025429]     | -1.88 | 3.04e-08 | 2.43e-05 |
| Bcan         | <i>Mus musculus</i> brevican (Bcan), transcript variant 1, mRNA [NM_007529]                                        | 3.27  | 3.35e-08 | 2.54e-05 |
| Crip2        | <i>Mus musculus</i> cysteine rich protein 2 (Crip2), mRNA [NM_024223]                                              | 2.10  | 3.41e-08 | 2.54e-05 |
| Rcc2         | <i>Mus musculus</i> regulator of chromosome condensation 2 (Rcc2), mRNA [NM_173867]                                | 2.24  | 3.57e-08 | 2.60e-05 |
| LOC634933    | PREDICTED: <i>Mus musculus</i> similar to protein phosphatase 1, catalytic subunit (LOC634933), mRNA [XM_909811]   | -2.90 | 3.81e-08 | 2.68e-05 |
| Dnajb2       | <i>Mus musculus</i> DnaJ (Hsp40) homolog, subfamily B, member 2 (Dnajb2), transcript variant 1, mRNA [NM_020266]   | -1.85 | 3.85e-08 | 2.68e-05 |
| Cmtm5        | <i>Mus musculus</i> CKLF-like MARVEL transmembrane domain containing 5 (Cmtm5), mRNA [NM_026066]                   | -1.96 | 3.94e-08 | 2.68e-05 |
| Cyp26b1      | <i>Mus musculus</i> cytochrome P450, family 26, subfamily b, polypeptide 1 (Cyp26b1), mRNA [NM_175475]             | 2.50  | 4.13e-08 | 2.75e-05 |
| 261000J02Rik | <i>Mus musculus</i> RIKEN cDNA 261000J02 gene (261000J02Rik), mRNA [NM_001033134]                                  | 1.98  | 4.86e-08 | 3.18e-05 |
| Fos          | <i>Mus musculus</i> FBJ osteosarcoma oncogene (Fos), mRNA [NM_010234]                                              | 2.36  | 4.97e-08 | 3.19e-05 |
| Abca1        | <i>Mus musculus</i> ATP-binding cassette, sub-family A (ABC1), member 1 (Abca1), mRNA [NM_013454]                  | 2.24  | 5.28e-08 | 3.26e-05 |
| Snhg1        | <i>Mus musculus</i> small nucleolar RNA host gene (non-protein coding) 1 (Snhg1), non-coding RNA [NR_002896]       | 1.93  | 5.34e-08 | 3.26e-05 |
| Gm13889      | <i>Mus musculus</i> predicted gene 13889 (Gm13889), mRNA [NM_001145034]                                            | 2.15  | 5.74e-08 | 3.38e-05 |
| Itpr2        | <i>Mus musculus</i> inositol 1,4,5-trisphosphate receptor 2 (Itpr2), transcript variant 1, mRNA [NM_019923]        | 2.36  | 5.80e-08 | 3.38e-05 |

|               |                                                                                                                                                                                                           |       |          |          |
|---------------|-----------------------------------------------------------------------------------------------------------------------------------------------------------------------------------------------------------|-------|----------|----------|
| Btg1          | <i>Mus musculus</i> B-cell translocation gene 1, anti-proliferative (Btg1), mRNA [NM_007569]                                                                                                              | 3.03  | 6.03e-08 | 3.45e-05 |
| Micall1       | <i>Mus musculus</i> microtubule associated monooxygenase, calponin and LIM domain containing -like 1 (Micall1), mRNA [NM_177461]                                                                          | -1.59 | 6.50e-08 | 3.65e-05 |
| Tppp          | <i>Mus musculus</i> tubulin polymerization promoting protein (Tppp), mRNA [NM_182839]                                                                                                                     | -1.53 | 6.77e-08 | 3.74e-05 |
| Cpe           | <i>Mus musculus</i> carboxypeptidase E (Cpe), mRNA [NM_013494]                                                                                                                                            | 1.88  | 6.99e-08 | 3.80e-05 |
| H2-K1         | <i>Mus musculus</i> histocompatibility 2, K1, K region (H2-K1), transcript variant 1, mRNA [NM_001001892]                                                                                                 | 2.11  | 7.26e-08 | 3.87e-05 |
| Enoph1        | <i>Mus musculus</i> enolase-phosphatase 1 (Enoph1), transcript variant 1, mRNA [NM_026421]                                                                                                                | -1.63 | 7.37e-08 | 3.87e-05 |
| Camk2n2       | <i>Mus musculus</i> calcium/calmodulin- dependent protein kinase II inhibitor 2 (Camk2n2), mRNA [NM_028420]                                                                                               | 2.32  | 8.05e-08 | 4.11e-05 |
| H2-D1         | <i>Mus musculus</i> histocompatibility 2, D region locus 1 (H2-D1), mRNA [NM_010380]                                                                                                                      | 2.84  | 8.08e-08 | 4.11e-05 |
| Sgk2          | <i>Mus musculus</i> serum/glucocorticoid regulated kinase 2 (Sgk2), mRNA [NM_013731]                                                                                                                      | -2.66 | 9.13e-08 | 4.47e-05 |
| Ugt8a         | <i>Mus musculus</i> UDP galactosyltransferase 8A (Ugt8a), mRNA [NM_011674]                                                                                                                                | -1.83 | 9.19e-08 | 4.47e-05 |
| 6330503K22Rik | <i>Mus musculus</i> RIKEN cDNA 6330503K22 gene (6330503K22Rik), mRNA [NM_182995]                                                                                                                          | -1.97 | 9.22e-08 | 4.47e-05 |
| Msn           | <i>Mus musculus</i> moesin (Msn), mRNA [NM_010833]                                                                                                                                                        | 2.27  | 9.44e-08 | 4.51e-05 |
| Gpr17         | <i>Mus musculus</i> G protein-coupled receptor 17 (Gpr17), mRNA [NM_001025381]                                                                                                                            | 2.93  | 9.61e-08 | 4.53e-05 |
| H3f3b         | <i>Mus musculus</i> H3 histone, family 3B (H3f3b), mRNA [NM_008211]                                                                                                                                       | 1.49  | 1.01e-07 | 4.55e-05 |
| Anln          | <i>Mus musculus</i> anillin, actin binding protein (Anln), mRNA [NM_028390]                                                                                                                               | -1.82 | 1.01e-07 | 4.55e-05 |
| Tmeff1        | <i>Mus musculus</i> transmembrane protein with EGF-like and two follistatin-like domains 1 (Tmeff1), mRNA [NM_021436]                                                                                     | -1.77 | 1.02e-07 | 4.55e-05 |
| Mical1        | <i>Mus musculus</i> microtubule associated monooxygenase, calponin and LIM domain containing 1 (Mical1), transcript variant 1, mRNA [NM_138315]                                                           | 2.04  | 1.00e-07 | 4.55e-05 |
| S1pr5         | <i>Mus musculus</i> sphingosine-1-phosphate receptor 5 (S1pr5), mRNA [NM_053190]                                                                                                                          | -1.79 | 1.13e-07 | 4.91e-05 |
| Slc3a2        | <i>Mus musculus</i> solute carrier family 3 (activators of dibasic and neutral amino acid transport), member 2 (Slc3a2), transcript variant 2, mRNA [NM_008577]                                           | 1.76  | 1.25e-07 | 5.35e-05 |
| Ephx1         | <i>Mus musculus</i> epoxide hydrolase 1, microsomal (Ephx1), mRNA [NM_010145]                                                                                                                             | 2.66  | 1.30e-07 | 5.48e-05 |
| 2410006H16Rik | <i>Mus musculus</i> RIKEN cDNA 2410006H16 gene (2410006H16Rik), non-coding RNA [NR_030738]                                                                                                                | 2.56  | 1.34e-07 | 5.48e-05 |
| Chchd10       | <i>Mus musculus</i> coiled-coil-helix-coiled-coil-helix domain containing 10 (Chchd10), mRNA [NM_175329]                                                                                                  | 2.85  | 1.35e-07 | 5.48e-05 |
| Dusp6         | <i>Mus musculus</i> dual specificity phosphatase 6 (Dusp6), mRNA [NM_026268]                                                                                                                              | 2.49  | 1.35e-07 | 5.48e-05 |
| Midn          | <i>Mus musculus</i> midnolin (Midn), mRNA [NM_021565]                                                                                                                                                     | 2.56  | 1.43e-07 | 5.53e-05 |
| 1810032O08Rik | <i>Mus musculus</i> RIKEN cDNA 1810032O08 gene (1810032O08Rik), transcript variant 3, non-coding RNA [NR_027821]                                                                                          | 1.93  | 1.45e-07 | 5.53e-05 |
| Trim47        | <i>Mus musculus</i> tripartite motif-containing 47 (Trim47), mRNA [NM_172570]                                                                                                                             | 2.15  | 1.42e-07 | 5.53e-05 |
| 3830612M24    | <i>Mus musculus</i> 18 days pregnant adult female placenta and extra embryonic tissue cDNA, RIKEN full-length enriched library, clone:3830612M24 product:unclassifiable, full insert sequence. [AK028406] | 2.88  | 1.43e-07 | 5.53e-05 |

|               |                                                                                                                                      |       |          |          |
|---------------|--------------------------------------------------------------------------------------------------------------------------------------|-------|----------|----------|
| Traf4         | <i>Mus musculus</i> TNF receptor associated factor 4 (Traf4), mRNA [NM_009423]                                                       | 2.47  | 1.44e-07 | 5.53e-05 |
| Klf6          | <i>Mus musculus</i> Kruppel-like factor 6 (Klf6), mRNA [NM_011803]                                                                   | 1.65  | 1.51e-07 | 5.71e-05 |
| Adamtsl4      | <i>Mus musculus</i> ADAMTS-like 4 (Adamtsl4), mRNA [NM_144899]                                                                       | -2.48 | 1.59e-07 | 5.90e-05 |
| Pppde2        | <i>Mus musculus</i> PPPDE peptidase domain containing 2 (Pppde2), mRNA [NM_134095]                                                   | -2.17 | 1.60e-07 | 5.90e-05 |
| Lmna          | <i>Mus musculus</i> lamin A (Lmna), transcript variant 2, mRNA [NM_019390]                                                           | 1.91  | 1.64e-07 | 5.90e-05 |
| 1500012F01Rik | <i>Mus musculus</i> RIKEN cDNA 1500012F01 gene (1500012F01Rik), mRNA [NM_001081005]                                                  | 1.68  | 1.65e-07 | 5.90e-05 |
| C4b           | <i>Mus musculus</i> complement component4B (Childo blood group) (C4b), mRNA [NM_009780]                                              | 2.09  | 1.66e-07 | 5.90e-05 |
| Prrg1         | <i>Mus musculus</i> proline rich Gla (G-carboxyglutamic acid) 1 (Prrg1), transcript variant 1, mRNA [NM_027322]                      | -1.95 | 1.68e-07 | 5.90e-05 |
| Efhd1         | <i>Mus musculus</i> EF hand domaincontaining 1 (Efhd1), mRNA [NM_028889]                                                             | -1.93 | 1.75e-07 | 6.08e-05 |
| Zfp703        | <i>Mus musculus</i> zinc finger protein 703(Zfp703), transcript variant 2, mRNA [NM_001110508]                                       | 2.88  | 1.79e-07 | 6.17e-05 |
| Aars          | <i>Mus musculus</i> alanyl-tRNA synthetase (Aars), mRNA [NM_146217]                                                                  | 1.83  | 1.82e-07 | 6.22e-05 |
| 4930506M07Rik | <i>Mus musculus</i> RIKEN cDNA 4930506M07 gene (4930506M07Rik), transcript variant 2, mRNA [NM_175172]                               | -2.42 | 2.15e-07 | 7.10e-05 |
| Ddit3         | <i>Mus musculus</i> DNA-damage inducibletranscript 3 (Ddit3), mRNA [NM_007837]                                                       | 2.26  | 2.15e-07 | 7.10e-05 |
| Gzmm          | <i>Mus musculus</i> granzyme M (lymphocytemet-ase 1) (Gzmm), mRNA [NM_008504]                                                        | 1.78  | 2.35e-07 | 7.67e-05 |
| Atf3          | <i>Mus musculus</i> activating transcription factor 3 (Atf3), mRNA [NM_007498]                                                       | 2.99  | 2.45e-07 | 7.92e-05 |
| Pea15a        | <i>Mus musculus</i> phosphoprotein enrichedin astrocytes 15A (Pea15a), transcript variant 2, mRNA [NM_011063]                        | -1.57 | 2.48e-07 | 7.92e-05 |
| Sfxn3         | <i>Mus musculus</i> sideroflexin 3 (Sfxn3), mRNA [NM_053197]                                                                         | 1.61  | 2.50e-07 | 7.92e-05 |
| Prr5l         | <i>Mus musculus</i> proline rich 5 like (Prr5l),transcript variant 2, mRNA [NM_175181]                                               | -1.10 | 2.57e-07 | 8.06e-05 |
| Stmn3         | <i>Mus musculus</i> stathmin-like 3 (Stmn3),mRNA [NM_009133]                                                                         | 2.06  | 2.69e-07 | 8.38e-05 |
| Padi2         | <i>Mus musculus</i> peptidyl arginine deiminase, type II (Padi2), mRNA [NM_008812]                                                   | -1.75 | 2.74e-07 | 8.42e-05 |
| Synj2         | <i>Mus musculus</i> synaptojanin 2 (Synj2),transcript variant 3, mRNA [NM_011523]                                                    | -2.01 | 2.76e-07 | 8.42e-05 |
| Tap2          | <i>Mus musculus</i> transporter 2, ATP-binding cassette, sub-family B (MDR/TAP) (Tap2), mRNA [NM_011530]                             | 2.09  | 3.10e-07 | 9.37e-05 |
| B2m           | <i>Mus musculus</i> beta-2 microglobulin (B2m), mRNA [NM_009735]                                                                     | 2.18  | 3.14e-07 | 9.39e-05 |
| Sept7         | <i>Mus musculus</i> septin 7 (Sept7), mRNA [NM_009859]                                                                               | -1.23 | 3.30e-07 | 9.61e-05 |
| 1810041L15Rik | <i>Mus musculus</i> RIKEN cDNA 1810041L15 gene (1810041L15Rik), mRNA [NM_001163145]                                                  | 2.79  | 3.38e-07 | 9.76e-05 |
| Arap2         | <i>Mus musculus</i> ArfGAP with RhoGAP domain, ankyrin repeat and PH domain 2(Arap2), mRNA [NM_178407]                               | 1.73  | 3.54e-07 | 1.00e-04 |
| Slco3a1       | <i>Mus musculus</i> solute carrier organic anion transporter family, member 3a1 (Slco3a1), transcript variant 2, mRNA [NM_001038643] | -1.58 | 3.59e-07 | 1.00e-04 |

|            |                                                                                                                                                        |       |          |          |
|------------|--------------------------------------------------------------------------------------------------------------------------------------------------------|-------|----------|----------|
| Egr2       | <i>Mus musculus</i> early growth response 2 (Egr2), mRNA [NM_010118]                                                                                   | 2.47  | 3.64e-07 | 1.00e-04 |
| Brd2       | <i>Mus musculus</i> bromodomain containing 2(Brd2), transcript variant 2, mRNA [NM_001025387]                                                          | 1.30  | 3.64e-07 | 1.00e-04 |
| Slc1a1     | <i>Mus musculus</i> solute carrier family 1 (neuronal/epithelial high affinity glutamate transporter, system Xag), member 1 (Slc1a1), mRNA [NM_009199] | 2.43  | 3.65e-07 | 1.00e-04 |
| Moxd1      | <i>Mus musculus</i> monooxygenase, DBH-like 1 (Moxd1), mRNA [NM_021509]                                                                                | 4.18  | 3.58e-07 | 1.00e-04 |
| Bnip3l     | <i>Mus musculus</i> BCL2/adenovirus E1Binteracting protein 3-like (Bnip3l), mRNA [NM_009761]                                                           | -1.14 | 3.69e-07 | 1.00e-04 |
| Epb4.113   | <i>Mus musculus</i> erythrocyte protein band4.1-like 3 (Epb4.113), mRNA [NM_013813]                                                                    | -1.74 | 4.05e-07 | 1.08e-04 |
| Mt2        | <i>Mus musculus</i> metallothionein 2 (Mt2), mRNA [NM_008630]                                                                                          | 3.35  | 4.37e-07 | 1.15e-04 |
| D16Ert472e | <i>Mus musculus</i> DNA segment, Chr 16,ERATO Doi 472, expressed (D16Ert472e), mRNA [NM_025967]                                                        | -1.33 | 4.61e-07 | 1.19e-04 |
| Hmgcs1     | <i>Mus musculus</i> 3-hydroxy-3- methylglutaryl-Coenzyme A synthase 1 (Hmgcs1), mRNA [NM_145942]                                                       | -1.74 | 4.75e-07 | 1.22e-04 |
| Kcnp3      | <i>Mus musculus</i> Kv channel interacting protein 3, calsenilin (Kcnp3), transcriptvariant 2, mRNA [NM_001111331]                                     | 2.78  | 4.89e-07 | 1.23e-04 |
| Chpf       | <i>Mus musculus</i> chondroitin polymerizing factor (Chpf), transcript variant 2, mRNA [NM_001001565]                                                  | 1.59  | 4.93e-07 | 1.23e-04 |
| Eif4ebp1   | <i>Mus musculus</i> eukaryotic translationinitiation factor 4E binding protein 1 (Eif4ebp1), mRNA [NM_007918]                                          | 3.88  | 4.94e-07 | 1.23e-04 |
| Slc5a11    | <i>Mus musculus</i> solute carrier family 5 (sodium/glucose cotransporter), member11 (Slc5a11), mRNA [NM_146198]                                       | -1.96 | 5.27e-07 | 1.29e-04 |
| Slc38a1    | <i>Mus musculus</i> solute carrier family 38, member 1 (Slc38a1), transcript variant 1,mRNA [NM_134086]                                                | 2.12  | 5.50e-07 | 1.33e-04 |
| Sort1      | <i>Mus musculus</i> sortilin 1 (Sort1), mRNA [NM_019972]                                                                                               | -1.43 | 5.55e-07 | 1.34e-04 |
| Aspa       | <i>Mus musculus</i> aspartoacylase (Aspa), mRNA [NM_023113]                                                                                            | -1.49 | 5.68e-07 | 1.34e-04 |
| Entpd5     | <i>Mus musculus</i> ectonucleoside triphosphate diphosphohydrolase 5 (Entpd5), transcript variant 2, mRNA [NM_001026214]                               | -1.66 | 5.67e-07 | 1.34e-04 |
| Ptpd       | <i>Mus musculus</i> protein tyrosine phosphatase, receptor type, D (Ptpd),transcript variant b, mRNA [NM_011211]                                       | -2.27 | 5.68e-07 | 1.34e-04 |
| H2-Q7      | <i>Mus musculus</i> histocompatibility 2, Q region locus 7 (H2-Q7), mRNA[NM_010394]                                                                    | 2.33  | 6.04e-07 | 1.39e-04 |
| Gm7035     | <i>Mus musculus</i> predicted gene 7035(Gm7035), non-coding RNA [NR_004446]                                                                            | 1.51  | 6.26e-07 | 1.43e-04 |
| Nelf       | <i>Mus musculus</i> nasal embryonic LHRH factor (Nelf), transcript variant 1, mRNA [NM_001039386]                                                      | -1.15 | 7.13e-07 | 1.61e-04 |
| Dock6      | <i>Mus musculus</i> dedicator of cytokinesis 6 (Dock6), mRNA [NM_177030]                                                                               | 1.59  | 7.26e-07 | 1.62e-04 |
| Cebpb      | <i>Mus musculus</i> CCAAT/enhancer binding protein (C/EBP), beta (Cebpb), mRNA [NM_009883]                                                             | 2.33  | 7.27e-07 | 1.62e-04 |
| Gdf1       | <i>Mus musculus</i> growth differentiationfactor 1 (Gdf1), transcript variant 2, mRNA [NM_008107]                                                      | 1.61  | 7.42e-07 | 1.64e-04 |
| Gpt        | <i>Mus musculus</i> glutamic pyruvic transaminase, soluble (Gpt), mRNA [NM_182805]                                                                     | -1.77 | 7.75e-07 | 1.70e-04 |
| Cr1f2      | <i>Mus musculus</i> cytokine receptor-likefactor 2 (Cr1f2),                                                                                            | 1.81  | 7.87e-07 | 1.72e-04 |

|               |                                                                                                                                                                            |       |          |          |
|---------------|----------------------------------------------------------------------------------------------------------------------------------------------------------------------------|-------|----------|----------|
|               | transcript variant 1, mRNA [NM_001164735]                                                                                                                                  |       |          |          |
| Snhg12        | <i>Mus musculus</i> small nucleolar RNA hostgene 12 (Snhg12), non-coding RNA [NR_029468]                                                                                   | 1.80  | 8.03e-07 | 1.74e-04 |
| Jph4          | <i>Mus musculus</i> junctophilin 4 (Jph4), transcript variant a, mRNA [NM_177049]                                                                                          | -3.81 | 8.19e-07 | 1.76e-04 |
| H2-T23        | <i>Mus musculus</i> histocompatibility 2, Tregion locus 23 (H2-T23), mRNA [NM_010398]                                                                                      | 1.92  | 8.49e-07 | 1.81e-04 |
| Dip2a         | <i>Mus musculus</i> DIP2 disco-interactingprotein 2 homolog A (Drosophila) (Dip2a), mRNA [NM_001081419]                                                                    | -1.40 | 8.52e-07 | 1.81e-04 |
| Foxn3         | <i>Mus musculus</i> forkhead box N3 (Foxn3), mRNA [NM_183186]                                                                                                              | -1.41 | 8.97e-07 | 1.89e-04 |
| Tmem176b      | <i>Mus musculus</i> transmembrane protein 176B (Tmem176b), transcript variant 1, mRNA [NM_023056]                                                                          | 2.76  | 9.23e-07 | 1.93e-04 |
| Gars          | <i>Mus musculus</i> glycyl-tRNA synthetase(Gars), mRNA [NM_180678]                                                                                                         | 1.05  | 9.83e-07 | 2.05e-04 |
| Jam3          | <i>Mus musculus</i> junction adhesion molecule 3 (Jam3), mRNA [NM_023277]                                                                                                  | -0.98 | 1.07e-06 | 2.20e-04 |
| Atp1b3        | <i>Mus musculus</i> ATPase, Na+/K+ transporting, beta 3 polypeptide (Atp1b3),mRNA [NM_007502]                                                                              | -1.27 | 1.07e-06 | 2.20e-04 |
| Fzd1          | <i>Mus musculus</i> frizzled homolog 1(Drosophila) (Fzd1), mRNA [NM_021457]                                                                                                | 2.26  | 1.12e-06 | 2.28e-04 |
| Gdf15         | <i>Mus musculus</i> growth differentiation factor 15 (Gdf15), mRNA [NM_011819]                                                                                             | 5.28  | 1.12e-06 | 2.28e-04 |
| Rab34         | <i>Mus musculus</i> RAB34, member of RAS oncogene family (Rab34), transcriptvariant 1, mRNA [NM_033475]                                                                    | 1.69  | 1.13e-06 | 2.28e-04 |
| Eml2          | <i>Mus musculus</i> echinoderm microtubuleassociated protein like 2 (Eml2), transcript variant 1, mRNA [NM_028153]                                                         | -1.66 | 1.19e-06 | 2.39e-04 |
| Rasl12        | <i>Mus musculus</i> RAS-like, family 12 (Rasl12), transcript variant 1, mRNA [NM_001033158]                                                                                | -1.93 | 1.21e-06 | 2.40e-04 |
| Rhoc          | <i>Mus musculus</i> ras homolog gene family, member C (Rhoc), mRNA [NM_007484]                                                                                             | 1.44  | 1.23e-06 | 2.42e-04 |
| Itih3         | <i>Mus musculus</i> inter-alpha trypsin inhibitor, heavy chain 3 (Itih3), mRNA [NM_008407]                                                                                 | -2.29 | 1.32e-06 | 2.57e-04 |
| Nipa1         | <i>Mus musculus</i> non imprinted in Prader-Willi/Angelman syndrome 1 homolog (human) (Nipa1), mRNA [NM_153578]                                                            | -1.76 | 1.31e-06 | 2.57e-04 |
| Cars          | <i>Mus musculus</i> cysteinyl-tRNA synthetase (Cars), mRNA [NM_013742]                                                                                                     | 1.43  | 1.35e-06 | 2.60e-04 |
| Daam1         | <i>Mus musculus</i> dishevelled associated activator of morphogenesis 1 (Daam1),transcript variant 1, mRNA [NM_026102]                                                     | -1.85 | 1.36e-06 | 2.60e-04 |
| 4930506C21Rik | <i>Mus musculus</i> adult male testis cDNA, RIKEN full-length enriched library, clone:4930506C21 product:unclassifiable, full insert sequence. [AK015714] clone:4930506C21 | -2.15 | 1.43e-06 | 2.72e-04 |
| Ctnna2        | <i>Mus musculus</i> catenin (cadherin associated protein), alpha 2 (Ctnna2),transcript variant 2, mRNA [NM_009819]                                                         | -1.29 | 1.46e-06 | 2.76e-04 |
| Cebpd         | <i>Mus musculus</i> CCAAT/enhancer bindingprotein (C/EBP), delta (Cebpd), mRNA [NM_007679]                                                                                 | 2.49  | 1.49e-06 | 2.77e-04 |
| Opalin        | <i>Mus musculus</i> oligodendrocytic myelin paranodal and inner loop protein (Opalin), mRNA [NM_153520]                                                                    | -1.99 | 1.50e-06 | 2.77e-04 |
| Ciapi1        | <i>Mus musculus</i> cytokine induced apoptosis inhibitor 1 (Ciapi1), mRNA [NM_134141]                                                                                      | 1.38  | 1.50e-06 | 2.77e-04 |
| Ptpro         | <i>Mus musculus</i> protein tyrosine phosphatase, receptor type, O (Ptpro),transcript variant 1, mRNA [NM_011216]                                                          | 1.77  | 1.52e-06 | 2.77e-04 |

|          |                                                                                                                                                                                           |       |          |          |
|----------|-------------------------------------------------------------------------------------------------------------------------------------------------------------------------------------------|-------|----------|----------|
| Trim59   | <i>Mus musculus</i> tripartite motif-containing 59 (Trim59), mRNA [NM_025863]                                                                                                             | -1.11 | 1.52e-06 | 2.77e-04 |
| Gadd45a  | <i>Mus musculus</i> growth arrest and DNA- damage-inducible 45 alpha (Gadd45a),mRNA [NM_007836]                                                                                           | 2.07  | 1.53e-06 | 2.77e-04 |
| Cdkn1c   | <i>Mus musculus</i> cyclin-dependent kinaseinhibitor 1C (P57) (Cdkn1c), transcript variant 2, mRNA [NM_009876]                                                                            | 1.62  | 1.58e-06 | 2.84e-04 |
| Rnf13    | <i>Mus musculus</i> ring finger protein 13 (Rnf13), transcript variant 1, mRNA[NM_001113413]                                                                                              | -1.09 | 1.62e-06 | 2.88e-04 |
| Trim2    | <i>Mus musculus</i> tripartite motif-containing 2 (Trim2), mRNA [NM_030706]                                                                                                               | -0.91 | 1.61e-06 | 2.88e-04 |
| Adams1   | <i>Mus musculus</i> a disintegrin-like and metallopeptidase (reprolysin type) withthrombospondin type 1 motif, 1 (Adams1), mRNA [NM_009621]                                               | 1.36  | 1.63e-06 | 2.88e-04 |
| Chmp7    | <i>Mus musculus</i> CHMP family, member 7 (Chmp7), mRNA [NM_134078]                                                                                                                       | -1.27 | 1.64e-06 | 2.89e-04 |
| Fa2h     | <i>Mus musculus</i> fatty acid 2-hydroxylase (Fa2h), mRNA [NM_178086]                                                                                                                     | -1.43 | 1.69e-06 | 2.96e-04 |
| Dos      | <i>Mus musculus</i> downstream of Stk11 (Dos), mRNA [NM_015761]                                                                                                                           | 1.52  | 1.80e-06 | 3.14e-04 |
| Vps37b   | <i>Mus musculus</i> vacuolar protein sorting 37B (yeast) (Vps37b), mRNA[NM_177876]                                                                                                        | 1.52  | 1.83e-06 | 3.17e-04 |
| Sema5a   | <i>Mus musculus</i> sema domain, seven thrombospondin repeats (type 1 and type 1-like), transmembrane domain (TM) andshort cytoplasmic domain, (semaphorin) 5A (Sema5a), mRNA [NM_009154] | 2.11  | 1.84e-06 | 3.17e-04 |
| Pmp22    | <i>Mus musculus</i> peripheral myelin protein 22 (Pmp22), mRNA [NM_008885]                                                                                                                | -1.34 | 1.87e-06 | 3.20e-04 |
| Rufy3    | <i>Mus musculus</i> RUN and FYVE domain containing 3 (Rufy3), mRNA[NM_027530]                                                                                                             | -1.05 | 1.88e-06 | 3.20e-04 |
| Ier5l    | <i>Mus musculus</i> immediate early response 5-like (Ier5l), mRNA [NM_030244]                                                                                                             | 2.96  | 1.89e-06 | 3.21e-04 |
| Slc25a13 | <i>Mus musculus</i> solute carrier family 25 (mitochondrial carrier, adenine nucleotidetranslocator), member 13 (Slc25a13), nuclear gene encoding mitochondrialprotein, mRNA [NM_015829]  | -1.83 | 1.93e-06 | 3.24e-04 |
| Ldlr     | <i>Mus musculus</i> low density lipoprotein receptor (Ldlr), mRNA [NM_010700]                                                                                                             | -1.61 | 2.00e-06 | 3.34e-04 |
| 6430527G | <i>Mus musculus</i> RIKEN cDNA                                                                                                                                                            | 1.53  | 2.08e-06 | 3.45e-04 |
| 18Rik    | 6430527G18 gene (6430527G18Rik), mRNA [NM_145836]                                                                                                                                         |       |          |          |
| Timp3    | <i>Mus musculus</i> tissue inhibitor of metalloproteinase 3 (Timp3), mRNA [NM_011595]                                                                                                     | 2.30  | 2.09e-06 | 3.45e-04 |
| Phyhd1   | <i>Mus musculus</i> phytanoyl-CoA dioxygenase domain containing 1 (Phyhd1), mRNA [NM_172267]                                                                                              | 2.29  | 2.11e-06 | 3.47e-04 |
| Il18     | <i>Mus musculus</i> interleukin 18 (Il18),mRNA [NM_008360]                                                                                                                                | -1.21 | 2.13e-06 | 3.48e-04 |
| Pcdhga9  | <i>Mus musculus</i> protocadherin gammasubfamily A, 9 (Pcdhga9), mRNA [NM_033592]                                                                                                         | 1.25  | 2.17e-06 | 3.53e-04 |
| Aldh3b1  | <i>Mus musculus</i> aldehyde dehydrogenase 3family, member B1 (Aldh3b1), mRNA [NM_026316]                                                                                                 | -1.37 | 2.20e-06 | 3.57e-04 |
| Shroom2  | <i>Mus musculus</i> shroom family member 2 (Shroom2), mRNA [NM_172441]                                                                                                                    | -1.24 | 2.24e-06 | 3.57e-04 |
| LOC68395 | PREDICTED: <i>Mus musculus</i> RIKENcDNA 0610037M15 gene, transcript variant 2 (0610037M15Rik), mRNA [XM_903697]                                                                          | 2.30  | 2.24e-06 | 3.57e-04 |
| Sesn2    | <i>Mus musculus</i> sestrin 2 (Sesn2), mRNA [NM_144907]                                                                                                                                   | 1.34  | 2.25e-06 | 3.57e-04 |
| Chac1    | <i>Mus musculus</i> ChaC, cation transport regulator-like 1 (E. coli) (Chac1), mRNA [NM_026929]                                                                                           | 3.98  | 2.23e-06 | 3.57e-04 |
| Fyn      | <i>Mus musculus</i> Fyn proto-oncogene (Fyn), transcript variant 1, mRNA[NM_001122893]                                                                                                    | 1.63  | 2.32e-06 | 3.65e-04 |
| Sertad1  | <i>Mus musculus</i> SERTA domaincontaining 1 (Sertad1), mRNA                                                                                                                              | 2.02  | 2.37e-06 | 3.69e-04 |

|          |                                                                                                                                                                                                |       |          |          |
|----------|------------------------------------------------------------------------------------------------------------------------------------------------------------------------------------------------|-------|----------|----------|
|          | [NM_018820]                                                                                                                                                                                    |       |          |          |
| Piga     | <i>Mus musculus</i> phosphatidylinositolglycan anchor biosynthesis, class A (Piga), mRNA [NM_011081]                                                                                           | -1.72 | 2.38e-06 | 3.69e-04 |
| Bcat1    | <i>Mus musculus</i> branched chain aminotransferase 1, cytosolic (Bcat1), transcript variant 2, mRNA [NM_007532]                                                                               | 1.47  | 2.40e-06 | 3.70e-04 |
| Erb2ip   | <i>Mus musculus</i> Erb2 interacting protein (Erb2ip), transcript variant 1, mRNA [NM_001005868]                                                                                               | -1.28 | 2.44e-06 | 3.72e-04 |
| Thyn1    | <i>Mus musculus</i> thymocyte nuclear protein 1 (Thyn1), mRNA [NM_144543]                                                                                                                      | 1.09  | 2.44e-06 | 3.72e-04 |
| Cntn1    | <i>Mus musculus</i> contactin 1 (Cntn1), transcript variant 1, mRNA [NM_001159647]                                                                                                             | 1.33  | 2.51e-06 | 3.80e-04 |
| Rcctb1   | <i>Mus musculus</i> regulator of chromosome condensation (RCC1) and BTB (POZ) domain containing protein 1 (Rcctb1), mRNA [NM_027764]                                                           | -1.34 | 2.52e-06 | 3.80e-04 |
| Arsg     | <i>Mus musculus</i> arylsulfatase G (Arsg), transcript variant 1, mRNA [NM_028710]                                                                                                             | -0.95 | 2.52e-06 | 3.80e-04 |
| Per1     | <i>Mus musculus</i> period homolog 1 (Drosophila) (Per1), transcript variant 1, mRNA [NM_011065]                                                                                               | 2.21  | 2.56e-06 | 3.84e-04 |
| Cdk5     | <i>Mus musculus</i> cyclin-dependent kinase 5 (Cdk5), mRNA [NM_007668]                                                                                                                         | -2.21 | 2.57e-06 | 3.84e-04 |
| Lap3     | <i>Mus musculus</i> leucine aminopeptidase 3 (Lap3), mRNA [NM_024434]                                                                                                                          | -1.06 | 2.60e-06 | 3.86e-04 |
| Odc1     | <i>Mus musculus</i> ornithine decarboxylase, structural 1 (Odc1), mRNA [NM_013614]                                                                                                             | 1.65  | 2.65e-06 | 3.91e-04 |
| Cdc42bpa | <i>Mus musculus</i> CDC42 binding protein kinase alpha (Cdc42bpa), mRNA [NM_001033285]                                                                                                         | -1.27 | 2.70e-06 | 3.98e-04 |
| Ninj2    | <i>Mus musculus</i> ninjurin 2 (Ninj2), mRNA [NM_016718]                                                                                                                                       | -2.65 | 2.73e-06 | 4.00e-04 |
| Cotl1    | <i>Mus musculus</i> coactosin-like 1 (Dictyostelium) (Cotl1), mRNA [NM_028071]                                                                                                                 | 2.14  | 2.75e-06 | 4.00e-04 |
| Atpgd1   | <i>Mus musculus</i> ATP-grasp domain containing 1 (Atpgd1), mRNA [NM_134148]                                                                                                                   | -3.23 | 2.80e-06 | 4.04e-04 |
| Dusp1    | <i>Mus musculus</i> dual specificity phosphatase 1 (Dusp1), mRNA [NM_013642]                                                                                                                   | 1.81  | 2.80e-06 | 4.04e-04 |
| Tuba1c   | <i>Mus musculus</i> tubulin, alpha 1C (Tuba1c), mRNA [NM_009448]                                                                                                                               | 2.25  | 2.85e-06 | 4.07e-04 |
| Hhip     | <i>Mus musculus</i> Hedgehog-interacting protein (Hhip), mRNA [NM_020259]                                                                                                                      | -1.39 | 2.84e-06 | 4.07e-04 |
| Cyfp2    | <i>Mus musculus</i> cytoplasmic FMR1 interacting protein 2 (Cyfp2), mRNA [NM_133769]                                                                                                           | 1.48  | 2.87e-06 | 4.08e-04 |
| Bmp4     | <i>Mus musculus</i> bone morphogenetic protein 4 (Bmp4), mRNA [NM_007554]                                                                                                                      | 2.32  | 2.88e-06 | 4.08e-04 |
| Hexim1   | <i>Mus musculus</i> hexamethylene bis- acetamide inducible 1 (Hexim1), mRNA [NM_138753]                                                                                                        | 1.55  | 2.94e-06 | 4.13e-04 |
| Rps2     | <i>Mus musculus</i> ribosomal protein S2 (Rps2), mRNA [NM_008503]                                                                                                                              | 0.96  | 3.02e-06 | 4.22e-04 |
| Plec1    | <i>Mus musculus</i> plectin 1 (Plec1), transcript variant 13, mRNA [NM_001163540]                                                                                                              | 2.19  | 3.09e-06 | 4.26e-04 |
| Mthfd2   | <i>Mus musculus</i> methylenetetrahydrofolate dehydrogenase (NAD+ dependent), methylenetetrahydrofolate cyclohydrolase (Mthfd2), nuclear gene encoding mitochondrial protein, mRNA [NM_008638] | 1.50  | 3.07e-06 | 4.26e-04 |
| Cnksr3   | <i>Mus musculus</i> Cnksr family member 3 (Cnksr3), mRNA [NM_172546]                                                                                                                           | 1.79  | 3.10e-06 | 4.26e-04 |
| Gale     | <i>Mus musculus</i> galactose-4-epimerase, UDP (Gale), mRNA [NM_178389]                                                                                                                        | 1.37  | 3.09e-06 | 4.26e-04 |
| Gm7159   | PREDICTED: <i>Mus musculus</i> predicted gene, EG635497 (EG635497), misc RNA [XR_002030]                                                                                                       | 1.19  | 3.13e-06 | 4.26e-04 |

|                |                                                                                                                                                                |       |          |          |
|----------------|----------------------------------------------------------------------------------------------------------------------------------------------------------------|-------|----------|----------|
| 5730469 M10Rik | <i>Mus musculus</i> RIKEN cDNA 5730469M10 gene (5730469M10Rik), mRNA [NM_027464]                                                                               | -1.59 | 3.13e-06 | 4.26e-04 |
| Nudt4          | <i>Mus musculus</i> nudix (nucleoside diphosphate linked moiety X)-type motif 4 (Nudt4), mRNA [NM_027722]                                                      | -1.40 | 3.14e-06 | 4.26e-04 |
| Dpysl4         | <i>Mus musculus</i> dihydropyrimidinase-like 4 (Dpysl4), mRNA [NM_011993]                                                                                      | 2.78  | 3.16e-06 | 4.28e-04 |
| Evl            | <i>Mus musculus</i> Ena-vasodilator stimulated phosphoprotein (Evl), transcript variant 1, mRNA [NM_001163394]                                                 | 1.41  | 3.29e-06 | 4.41e-04 |
| A230001 M10Rik | <i>Mus musculus</i> adult male hypothalamuscDNA, RIKEN full-length enriched library, clone:A230012K17 product:unclassifiable, full insert sequence. [AK038444] | -1.58 | 3.37e-06 | 4.49e-04 |
| Hopx           | <i>Mus musculus</i> HOP homeobox (Hopx), transcript variant 1, mRNA [NM_175606]                                                                                | -1.64 | 3.41e-06 | 4.51e-04 |
| Anxa2          | <i>Mus musculus</i> annexin A2 (Anxa2), mRNA [NM_007585]                                                                                                       | 2.48  | 3.40e-06 | 4.51e-04 |
| Rell1          | <i>Mus musculus</i> RELT-like 1 (Rell1), mRNA [NM_145923]                                                                                                      | 1.24  | 3.44e-06 | 4.53e-04 |
| Limch1         | <i>Mus musculus</i> LIM and calponin homology domains 1 (Limch1), mRNA [NM_001001980]                                                                          | -1.36 | 3.50e-06 | 4.55e-04 |
| Jam2           | <i>Mus musculus</i> junction adhesion molecule 2 (Jam2), mRNA [NM_023844]                                                                                      | 1.41  | 3.49e-06 | 4.55e-04 |
| Gm4892         | PREDICTED: <i>Mus musculus</i> similar toQM protein (LOC638133), mRNA [XM_914040]                                                                              | 0.78  | 3.54e-06 | 4.59e-04 |
| Zbtb7b         | <i>Mus musculus</i> zinc finger and BTB domain containing 7B (Zbtb7b), mRNA [NM_009565]                                                                        | 1.24  | 3.57e-06 | 4.61e-04 |
| Smtnl2         | <i>Mus musculus</i> smoothelin-like 2 (Smtnl2), mRNA [NM_177776]                                                                                               | -2.17 | 3.59e-06 | 4.61e-04 |
| Gm8432         | PREDICTED: <i>Mus musculus</i> predicted gene, EG667040 (EG667040), misc RNA [XR_001962]                                                                       | 1.62  | 3.65e-06 | 4.68e-04 |
| Cmtm3          | <i>Mus musculus</i> CKLF-like MARVELtransmembrane domain containing 3 (Cmtm3), mRNA [NM_024217]                                                                | 1.64  | 3.67e-06 | 4.68e-04 |
| Emp1           | <i>Mus musculus</i> epithelial membrane protein 1 (Emp1), mRNA [NM_010128]                                                                                     | 3.45  | 3.68e-06 | 4.68e-04 |
| LOC100047340   | PREDICTED: <i>Mus musculus</i> hypothetical protein LOC100047340(LOC100047340), mRNA [XM_001477942]                                                            | 1.77  | 3.74e-06 | 4.68e-04 |
| 9630013A20Rik  | <i>Mus musculus</i> RIKEN cDNA 9630013A20 gene (9630013A20Rik), non-coding RNA [NR_015539]                                                                     | 2.60  | 3.74e-06 | 4.68e-04 |
| Txnip          | <i>Mus musculus</i> thioredoxin interacting protein (Txnip), transcript variant 1, mRNA [NM_001009935]                                                         | 1.58  | 3.71e-06 | 4.68e-04 |
| Stk40          | <i>Mus musculus</i> serine/threonine kinase 40(Stk40), transcript variant 1, mRNA [NM_001145827]                                                               | 1.56  | 3.74e-06 | 4.68e-04 |
| Hspa9          | <i>Mus musculus</i> heat shock protein 9(Hspa9), nuclear gene encoding mitochondrial protein, mRNA [NM_010481]                                                 | 1.05  | 3.77e-06 | 4.70e-04 |
| Gprc5b         | <i>Mus musculus</i> G protein-coupled receptor, family C, group 5, member B (Gprc5b), mRNA [NM_022420]                                                         | -0.97 | 3.80e-06 | 4.72e-04 |
| Glod4          | <i>Mus musculus</i> glyoxalase domain containing 4 (Glod4), mRNA [NM_026029]                                                                                   | -1.23 | 3.83e-06 | 4.73e-04 |
| Nmral1         | <i>Mus musculus</i> NmrA-like family domaincontaining 1 (Nmral1), mRNA [NM_026393]                                                                             | -1.65 | 3.85e-06 | 4.73e-04 |
| Mrps18b        | <i>Mus musculus</i> mitochondrial ribosomal protein S18B (Mrps18b), nuclear gene encoding mitochondrial protein, mRNA [NM_025878]                              | 1.24  | 3.85e-06 | 4.73e-04 |
| Grm3           | <i>Mus musculus</i> glutamate receptor, metabotropic 3 (Grm3), mRNA [NM_181850]                                                                                | -1.79 | 3.87e-06 | 4.73e-04 |

|                |                                                                                                                                              |       |          |          |
|----------------|----------------------------------------------------------------------------------------------------------------------------------------------|-------|----------|----------|
| Serpina3n      | <i>Mus musculus</i> serine (or cysteine) peptidase inhibitor, clade A, member 3N (Serpina3n), mRNA [NM_009252]                               | 2.30  | 3.90e-06 | 4.74e-04 |
| Ppp1r14b       | <i>Mus musculus</i> protein phosphatase 1, regulatory (inhibitor) subunit 14B (Ppp1r14b), mRNA [NM_008889]                                   | 1.74  | 3.91e-06 | 4.74e-04 |
| Prr18          | <i>Mus musculus</i> proline rich region 18(Prr18), transcript variant 1, mRNA [NM_178774]                                                    | -1.02 | 3.95e-06 | 4.75e-04 |
| Irf1           | <i>Mus musculus</i> interferon regulatory factor 1 (Irf1), transcript variant 1, mRNA [NM_008390]                                            | 1.82  | 3.98e-06 | 4.77e-04 |
| Tle6           | <i>Mus musculus</i> transducin-like enhancer of split 6, homolog of <i>Drosophila</i> E(spl) (Tle6), mRNA [NM_053254]                        | 1.45  | 3.99e-06 | 4.77e-04 |
| Angptl6        | <i>Mus musculus</i> angiopoietin-like 6 (Angptl6), mRNA [NM_145154]                                                                          | 1.76  | 4.09e-06 | 4.86e-04 |
| S100a6         | <i>Mus musculus</i> S100 calcium binding protein A6 (calcyclin) (S100a6), mRNA [NM_011313]                                                   | 2.33  | 4.11e-06 | 4.87e-04 |
| Lgals3         | <i>Mus musculus</i> lectin, galactose binding, soluble 3 (Lgals3), transcript variant 1, mRNA [NM_001145953]                                 | 2.76  | 4.16e-06 | 4.90e-04 |
| B9d2           | <i>Mus musculus</i> B9 protein domain 2 (B9d2), mRNA [NM_172148]                                                                             | 1.27  | 4.24e-06 | 4.96e-04 |
| Dynll2         | <i>Mus musculus</i> dynein light chain LC8-type 2 (Dynll2), transcript variant 1, mRNA [NM_026556]                                           | 1.28  | 4.29e-06 | 4.98e-04 |
| Clmn           | <i>Mus musculus</i> calmin (Clmn), transcript variant 1, mRNA [NM_053155]                                                                    | -1.73 | 4.32e-06 | 4.99e-04 |
| Ppp1cc         | <i>Mus musculus</i> protein phosphatase 1, catalytic subunit, gamma isoform (Ppp1cc), mRNA [NM_013636]                                       | -3.30 | 4.33e-06 | 4.99e-04 |
| Rnf141         | RING finger protein 141 (Zinc finger protein 230) [Source:UniProtKB/Swiss-Prot;Acc:Q99MB7] [ENSMUST00000106682]                              | -1.11 | 4.49e-06 | 5.15e-04 |
| Pdlim1         | <i>Mus musculus</i> PDZ and LIM domain 1 (elfin) (Pdlim1), mRNA [NM_016861]                                                                  | -1.46 | 4.55e-06 | 5.20e-04 |
| Gm5100         | PREDICTED: <i>Mus musculus</i> predicted gene, EG329126 (EG329126), misc RNA [XR_001880]                                                     | 1.13  | 4.62e-06 | 5.27e-04 |
| Sv2a           | <i>Mus musculus</i> synaptic vesicle glycoprotein 2 a (Sv2a), mRNA [NM_022030]                                                               | -1.37 | 4.67e-06 | 5.29e-04 |
| Ermn           | <i>Mus musculus</i> ermin, ERM-like protein (Ermn), mRNA [NM_029972]                                                                         | -1.39 | 4.70e-06 | 5.29e-04 |
| LOC100047749   | PREDICTED: <i>Mus musculus</i> similar to cAMP-specific cyclic nucleotide phosphodiesterase PDE8; MMPDE8 (LOC100047749), mRNA [XM_001478817] | -1.25 | 4.70e-06 | 5.29e-04 |
| Cntf           | <i>Mus musculus</i> ciliary neurotrophic factor (Cntf), mRNA [NM_170786]                                                                     | 1.69  | 4.74e-06 | 5.29e-04 |
| Gm11230        | PREDICTED: <i>Mus musculus</i> similar to ribosomal protein (LOC100039979), mRNA [XM_001474183]                                              | 1.22  | 4.76e-06 | 5.29e-04 |
| Gjc2           | <i>Mus musculus</i> gap junction protein, gamma 2 (Gjc2), transcript variant 2, mRNA [NM_175452]                                             | -1.80 | 4.77e-06 | 5.29e-04 |
| Srcin1         | <i>Mus musculus</i> SRC kinase signaling inhibitor 1 (Srcin1), mRNA [NM_018873]                                                              | -1.69 | 4.99e-06 | 5.52e-04 |
| RP23-480B19.10 | PREDICTED: <i>Mus musculus</i> similar to histone 2a, transcript variant 2 (Rp23-480b19.10), mRNA [XM_978341]                                | 2.48  | 5.05e-06 | 5.56e-04 |
| Rasal1         | <i>Mus musculus</i> RAS protein activator like 1 (GAP1 like) (Rasal1), mRNA [NM_013832]                                                      | -2.13 | 5.37e-06 | 5.83e-04 |
| Gm4838         | PREDICTED: <i>Mus musculus</i> predicted gene, EG225416 (EG225416), mRNA [XM_140295]                                                         | 1.57  | 5.36e-06 | 5.83e-04 |
| Btg2           | <i>Mus musculus</i> B-cell translocation gene 2, anti-proliferative (Btg2), mRNA                                                             | 1.55  | 5.36e-06 | 5.83e-04 |

|         |                                                                                                                                                                                     |       |          |          |
|---------|-------------------------------------------------------------------------------------------------------------------------------------------------------------------------------------|-------|----------|----------|
|         | [NM_007570]                                                                                                                                                                         |       |          |          |
| Gm10653 | <i>Mus musculus</i> predicted gene 10653(Gm10653), non-coding RNA [NR_003965]                                                                                                       | 0.97  | 5.40e-06 | 5.83e-04 |
| Sepx1   | <i>Mus musculus</i> selenoprotein X 1 (Sepx1), mRNA [NM_013759]                                                                                                                     | -1.07 | 5.42e-06 | 5.83e-04 |
| Gm7204  | PREDICTED: <i>Mus musculus</i> predicted gene, EG637273, transcript variant 1 (EG637273), mRNA [XM_917437]                                                                          | -1.36 | 5.48e-06 | 5.86e-04 |
| Btg3    | <i>Mus musculus</i> B-cell translocation gene 3 (Btg3), mRNA [NM_009770]                                                                                                            | 1.46  | 5.49e-06 | 5.86e-04 |
| Odz4    | <i>Mus musculus</i> odd Oz/ten-m homolog 4 (Drosophila) (Odz4), mRNA [NM_011858]                                                                                                    | 1.68  | 5.60e-06 | 5.97e-04 |
| Hspb1   | <i>Mus musculus</i> heat shock protein 1 (Hspb1), mRNA [NM_013560]                                                                                                                  | 1.62  | 5.66e-06 | 5.99e-04 |
| Susd4   | <i>Mus musculus</i> sushi domain containing 4 (Susd4), mRNA [NM_144796]                                                                                                             | 1.92  | 5.67e-06 | 5.99e-04 |
| Sh3bp5l | <i>Mus musculus</i> SH3 binding domain protein 5 like (Sh3bp5l), transcript variant 1, mRNA [NM_001161338]                                                                          | -1.01 | 5.72e-06 | 6.03e-04 |
| Sc4mol  | <i>Mus musculus</i> sterol-C4-methyl oxidase-like (Sc4mol), mRNA [NM_025436]                                                                                                        | -1.43 | 5.78e-06 | 6.07e-04 |
| Rftn1   | <i>Mus musculus</i> raftlin lipid raft linker 1 (Rftn1), mRNA [NM_181397]                                                                                                           | -2.10 | 5.85e-06 | 6.12e-04 |
| Gm8420  | PREDICTED: <i>Mus musculus</i> similar toribosomal protein L15 (LOC667014), mRNA [XM_001473655]                                                                                     | 0.97  | 5.89e-06 | 6.15e-04 |
| Ifrd1   | <i>Mus musculus</i> interferon-related developmental regulator 1 (Ifrd1), mRNA [NM_013562]                                                                                          | 1.19  | 6.06e-06 | 6.29e-04 |
| Tmem98  | <i>Mus musculus</i> transmembrane protein 98 (Tmem98), mRNA [NM_029537]                                                                                                             | -1.44 | 6.07e-06 | 6.29e-04 |
| Rps19   | <i>Mus musculus</i> ribosomal protein S19 (Rps19), mRNA [NM_023133]                                                                                                                 | 1.62  | 6.12e-06 | 6.31e-04 |
| Igln5   | <i>Mus musculus</i> IgLON family member 5 (Igln5), mRNA [NM_001164518]                                                                                                              | 2.01  | 6.39e-06 | 6.53e-04 |
| Pla2g4a | <i>Mus musculus</i> phospholipase A2, group IVA (cytosolic, calcium-dependent) (Pla2g4a), mRNA [NM_008869]                                                                          | -1.28 | 6.40e-06 | 6.53e-04 |
| Mthfd1l | <i>Mus musculus</i> methylenetetrahydrofolate dehydrogenase (NADP+ dependent) 1-like (Mthfd1l), nuclear gene encoding mitochondrial protein, transcript variant 2, mRNA [NM_172308] | 1.39  | 6.43e-06 | 6.54e-04 |
| Sdpr    | <i>Mus musculus</i> serum deprivation response (Sdpr), mRNA [NM_138741]                                                                                                             | -1.31 | 6.45e-06 | 6.54e-04 |
| Scpep1  | <i>Mus musculus</i> serine carboxypeptidase 1 (Scpep1), mRNA [NM_029023]                                                                                                            | 1.41  | 6.53e-06 | 6.60e-04 |
| Kcna1   | <i>Mus musculus</i> potassium voltage-gated channel, shaker-related subfamily, member 1 (Kcna1), mRNA [NM_010595]                                                                   | -1.39 | 6.67e-06 | 6.72e-04 |
| Gm2590  | PREDICTED: <i>Mus musculus</i> hypothetical protein LOC100040086(LOC100040086), mRNA [XM_001474060]                                                                                 | -2.04 | 6.69e-06 | 6.72e-04 |
| Ctss    | <i>Mus musculus</i> cathepsin S (Ctss), mRNA [NM_021281]                                                                                                                            | 2.84  | 6.84e-06 | 6.85e-04 |
| Ppp2r2c | <i>Mus musculus</i> protein phosphatase 2 (formerly 2A), regulatory subunit B (PR52), gamma isoform (Ppp2r2c), mRNA [NM_172994]                                                     | -1.54 | 6.91e-06 | 6.90e-04 |
| Pcgf5   | <i>Mus musculus</i> polycomb group ring finger 5 (Pcgf5), mRNA [NM_029508]                                                                                                          | 1.47  | 6.96e-06 | 6.93e-04 |
| Tet1    | <i>Mus musculus</i> tet oncogene 1 (Tet1), mRNA [NM_027384]                                                                                                                         | -1.55 | 7.00e-06 | 6.95e-04 |
| Aif1l   | <i>Mus musculus</i> allograft inflammatory factor 1-like (Aif1l), mRNA [NM_145144]                                                                                                  | -1.42 | 7.03e-06 | 6.96e-04 |
| Aprt    | <i>Mus musculus</i> adenine phosphoribosyl transferase (Aprt), mRNA [NM_009698]                                                                                                     | 1.65  | 7.15e-06 | 7.05e-04 |
| Prom1   | <i>Mus musculus</i> prominin 1 (Prom1), transcript variant 2,                                                                                                                       | 2.02  | 7.21e-06 | 7.09e-04 |

|               |                                                                                                                                                       |       |          |          |
|---------------|-------------------------------------------------------------------------------------------------------------------------------------------------------|-------|----------|----------|
|               | mRNA<br>[NM_001163577]                                                                                                                                |       |          |          |
| 1190002H23Rik | <i>Mus musculus</i> RIKEN cDNA 1190002H23 gene (1190002H23Rik), mRNA [NM_025427]                                                                      | 1.99  | 7.28e-06 | 7.13e-04 |
| Hhatl         | <i>Mus musculus</i> hedgehog acyltransferase-like (Hhatl), transcript variant 1, mRNA [NM_029095]                                                     | -2.17 | 7.46e-06 | 7.29e-04 |
| Tsc22d3       | <i>Mus musculus</i> TSC22 domain family, member 3 (Tsc22d3), transcript variant 1, mRNA [NM_001077364]                                                | -1.56 | 7.73e-06 | 7.53e-04 |
| Rhoj          | <i>Mus musculus</i> ras homolog gene family, member J (Rhoj), mRNA [NM_023275]                                                                        | 1.39  | 7.77e-06 | 7.54e-04 |
| H2-Q6         | <i>Mus musculus</i> histocompatibility 2, Qregion locus 6 (H2-Q6), mRNA [NM_207648]                                                                   | 2.19  | 7.79e-06 | 7.54e-04 |
| Pacsin3       | <i>Mus musculus</i> protein kinase C and casein kinase substrate in neurons 3 (Pacsin3), mRNA [NM_028733]                                             | -1.67 | 7.91e-06 | 7.61e-04 |
| Ano4          | <i>Mus musculus</i> anoctamin 4 (Ano4), mRNA [NM_178773]                                                                                              | -1.34 | 7.93e-06 | 7.61e-04 |
| Ppp1r14a      | <i>Mus musculus</i> protein phosphatase 1, regulatory (inhibitor) subunit 14A (Ppp1r14a), mRNA [NM_026731]                                            | -1.34 | 8.14e-06 | 7.73e-04 |
| Rpl10a        | <i>Mus musculus</i> ribosomal protein L10A (Rpl10a), mRNA [NM_011287]                                                                                 | 0.94  | 8.16e-06 | 7.73e-04 |
| Cept1         | <i>Mus musculus</i> choline/ethanolaminephosphotransferase 1 (Cept1), mRNA [NM_133869]                                                                | -0.91 | 8.18e-06 | 7.73e-04 |
| Fam171a1      | <i>Mus musculus</i> family with sequence similarity 171, member A1 (Fam171a1), mRNA [NM_001081161]                                                    | -1.28 | 8.39e-06 | 7.87e-04 |
| Pcdh10        | <i>Mus musculus</i> protocadherin 10 (Pcdh10), transcript variant 2, mRNA [NM_001098172]                                                              | 1.31  | 8.40e-06 | 7.87e-04 |
| Sema4f        | <i>Mus musculus</i> sema domain, immunoglobulin domain (Ig), TM domain, and short cytoplasmic domain (Sema4f), transcript variant 1, mRNA [NM_011350] | 1.42  | 8.45e-06 | 7.90e-04 |
| Tnr           | <i>Mus musculus</i> tenascin R (Tnr), mRNA [NM_022312]                                                                                                | 1.96  | 8.59e-06 | 7.98e-04 |
| Il17rb        | <i>Mus musculus</i> interleukin 17 receptor B (Il17rb), mRNA [NM_019583]                                                                              | -1.48 | 8.67e-06 | 7.99e-04 |
| Expi          | <i>Mus musculus</i> extracellular proteinase inhibitor (Expi), mRNA [NM_007969]                                                                       | -2.55 | 8.63e-06 | 7.99e-04 |
| Psen2         | <i>Mus musculus</i> presenilin 2 (Psen2), transcript variant 2, mRNA [NM_001128605]                                                                   | -1.22 | 8.69e-06 | 7.99e-04 |
| Prdx1         | <i>Mus musculus</i> peroxiredoxin 1 (Prdx1), mRNA [NM_011034]                                                                                         | -1.41 | 8.72e-06 | 7.99e-04 |
| Epas1         | <i>Mus musculus</i> endothelial PAS domain protein 1 (Epas1), mRNA [NM_010137]                                                                        | -1.16 | 8.73e-06 | 7.99e-04 |
| Zfp622        | <i>Mus musculus</i> zinc finger protein 622 (Zfp622), mRNA [NM_144523]                                                                                | 0.99  | 8.81e-06 | 8.04e-04 |
| Rps18         | <i>Mus musculus</i> ribosomal protein S18 (Rps18), mRNA [NM_011296]                                                                                   | 1.22  | 8.91e-06 | 8.11e-04 |
| Abcb10        | <i>Mus musculus</i> ATP-binding cassette, sub-family B (MDR/TAP), member 10 (Abcb10), nuclear gene encoding mitochondrial protein, mRNA [NM_019552]   | -1.25 | 8.93e-06 | 8.11e-04 |
| Ecel1         | <i>Mus musculus</i> endothelin converting enzyme-like 1 (Ecel1), mRNA [NM_021306]                                                                     | 2.31  | 9.09e-06 | 8.15e-04 |
| Tubb2c        | <i>Mus musculus</i> tubulin, beta 2C (Tubb2c), mRNA [NM_146116]                                                                                       | 1.05  | 9.07e-06 | 8.15e-04 |
| Tubb5         | <i>Mus musculus</i> tubulin, beta 5 (Tubb5), mRNA [NM_011655]                                                                                         | 1.37  | 9.08e-06 | 8.15e-04 |
| Plcl1         | <i>Mus musculus</i> phospholipase C-like 1 (Plcl1), mRNA [NM_001114663]                                                                               | -1.26 | 9.13e-06 | 8.15e-04 |
| Myh14         | <i>Mus musculus</i> myosin, heavy polypeptide 14 (Myh14), mRNA [NM_028021]                                                                            | -1.41 | 9.14e-06 | 8.15e-04 |

|               |                                                                                                                                       |       |          |          |
|---------------|---------------------------------------------------------------------------------------------------------------------------------------|-------|----------|----------|
| Rassf2        | <i>Mus musculus</i> Ras association (RalGDS/AF-6) domain family member 2 (Rassf2), mRNA [NM_175445]                                   | -0.91 | 9.17e-06 | 8.16e-04 |
| Sc5d          | <i>Mus musculus</i> sterol-C5-desaturase (fungal ERG3, delta-5-desaturase) homolog ( <i>S. cerevisiae</i> ) (Sc5d), mRNA [NM_172769]  | -1.36 | 9.32e-06 | 8.27e-04 |
| Crlf3         | <i>Mus musculus</i> cytokine receptor-like factor 3 (Crlf3), mRNA [NM_018776]                                                         | -1.56 | 9.54e-06 | 8.44e-04 |
| Fam181b       | <i>Mus musculus</i> family with sequence similarity 181, member B (Fam181b), mRNA [NM_021427]                                         | 3.79  | 9.89e-06 | 8.70e-04 |
| Arhgef10l     | <i>Mus musculus</i> Rho guanine nucleotide exchange factor (GEF) 10-like (Arhgef10l), transcript variant 1, mRNA [NM_172415]          | 1.95  | 1.01e-05 | 8.82e-04 |
| Mtvr2         | <i>Mus musculus</i> mammary tumor virus receptor 2 (Mtvr2), transcript variant 1, mRNA [NM_181452]                                    | 1.23  | 1.01e-05 | 8.82e-04 |
| Tiparp        | <i>Mus musculus</i> TCDD-inducible poly(ADP-ribose) polymerase (Tiparp), mRNA [NM_178892]                                             | 1.21  | 1.02e-05 | 8.87e-04 |
| Dock5         | <i>Mus musculus</i> dedicator of cytokinesis 5 (Dock5), mRNA [NM_177780]                                                              | -1.89 | 1.04e-05 | 9.01e-04 |
| Pitpnm1       | <i>Mus musculus</i> phosphatidylinositol transfer protein, membrane-associated 1 (Pitpnm1), transcript variant 2, mRNA [NM_001136078] | 1.47  | 1.05e-05 | 9.07e-04 |
| Gm8225        | PREDICTED: <i>Mus musculus</i> predicted gene, EG666668 (EG666668), mRNA [XM_985281]                                                  | 1.05  | 1.05e-05 | 9.08e-04 |
| Gsto1         | <i>Mus musculus</i> glutathione S-transferase omega 1 (Gsto1), mRNA [NM_010362]                                                       | 2.08  | 1.06e-05 | 9.10e-04 |
| Gm8842        | PREDICTED: <i>Mus musculus</i> predicted gene, EG667847, transcript variant 2 (EG667847), mRNA [XM_001003664]                         | 0.75  | 1.06e-05 | 9.10e-04 |
| Dhrs3         | <i>Mus musculus</i> dehydrogenase/reductase (SDR family) member 3 (Dhrs3), mRNA [NM_011303]                                           | 1.41  | 1.06e-05 | 9.10e-04 |
| Lrrc1         | <i>Mus musculus</i> leucine rich repeat containing 1 (Lrrc1), transcript variant 2, mRNA [NM_172528]                                  | -1.05 | 1.06e-05 | 9.10e-04 |
| Degs1         | <i>Mus musculus</i> degenerative spermatocyte homolog 1 ( <i>Drosophila</i> ) (Degs1), mRNA [NM_007853]                               | -0.96 | 1.07e-05 | 9.10e-04 |
| 2810408A11Rik | <i>Mus musculus</i> RIKEN cDNA 2810408A11 gene (2810408A11Rik), mRNA [NM_027419]                                                      | 1.35  | 1.07e-05 | 9.10e-04 |
| Pdlim4        | <i>Mus musculus</i> PDZ and LIM domain 4 (Pdlim4), mRNA [NM_019417]                                                                   | 4.24  | 1.08e-05 | 9.12e-04 |
| Trio          | <i>Mus musculus</i> triple functional domain (PTPRF interacting) (Trio), mRNA [NM_001081302]                                          | 2.17  | 1.09e-05 | 9.21e-04 |
| Eif3c         | <i>Mus musculus</i> eukaryotic translation initiation factor 3, subunit C (Eif3c), mRNA [NM_146200]                                   | 1.05  | 1.11e-05 | 9.31e-04 |
| Lrp1          | <i>Mus musculus</i> low density lipoprotein receptor-related protein 1 (Lrp1), mRNA [NM_008512]                                       | 1.57  | 1.14e-05 | 9.35e-04 |
| LOC10039646   | PREDICTED: <i>Mus musculus</i> similar topolyprotein (LOC100039646), mRNA [XM_001472835]                                              | -1.89 | 1.12e-05 | 9.35e-04 |
| 1700047M11Rik | <i>Mus musculus</i> RIKEN cDNA 1700047M11 gene (1700047M11Rik), non-coding RNA [NR_015458]                                            | -1.36 | 1.12e-05 | 9.35e-04 |
| Nup62         | <i>Mus musculus</i> nucleoporin 62 (Nup62), mRNA [NM_053074]                                                                          | 1.35  | 1.12e-05 | 9.35e-04 |
| Ccdc86        | <i>Mus musculus</i> coiled-coil domain containing 86 (Ccdc86), mRNA [NM_023731]                                                       | 1.34  | 1.13e-05 | 9.35e-04 |
| Fbxo25        | <i>Mus musculus</i> F-box protein 25 (Fbxo25), mRNA [NM_025785]                                                                       | -1.13 | 1.13e-05 | 9.35e-04 |
| Idi1          | <i>Mus musculus</i> isopentenyl-diphosphate delta isomerase (Idi1), mRNA                                                              | -1.66 | 1.14e-05 | 9.35e-04 |

|         |                                                                                                                    |       |          |          |
|---------|--------------------------------------------------------------------------------------------------------------------|-------|----------|----------|
|         | [NM_145360]                                                                                                        |       |          |          |
| Herc4   | <i>Mus musculus</i> hect domain and RLD 4 (Herc4), mRNA [NM_026101]                                                | -1.45 | 1.14e-05 | 9.35e-04 |
| Sorl1   | <i>Mus musculus</i> sortilin-related receptor, LDLR class A repeats-containing (Sorl1), mRNA [NM_011436]           | -1.54 | 1.15e-05 | 9.35e-04 |
| Dtx4    | <i>Mus musculus</i> deltex 4 homolog (Drosophila) (Dtx4), mRNA [NM_172442]                                         | 1.16  | 1.15e-05 | 9.35e-04 |
| Prkcz   | <i>Mus musculus</i> protein kinase C, zeta (Prkcz), transcript variant 1, mRNA [NM_008860]                         | -1.26 | 1.15e-05 | 9.39e-04 |
| Bex2    | <i>Mus musculus</i> brain expressed X-linked 2 (Bex2), mRNA [NM_009749]                                            | 1.76  | 1.18e-05 | 9.56e-04 |
| Pdrg1   | <i>Mus musculus</i> p53 and DNA damage regulated 1 (Pdrg1), mRNA [NM_178939]                                       | 0.90  | 1.18e-05 | 9.56e-04 |
| Pex1    | <i>Mus musculus</i> peroxisomal biogenesis factor 1 (Pex1), mRNA [NM_027777]                                       | -1.24 | 1.19e-05 | 9.62e-04 |
| Elovl5  | <i>Mus musculus</i> ELOVL family member 5, elongation of long chain fatty acids (yeast) (Elovl5), mRNA [NM_134255] | -0.98 | 1.20e-05 | 9.69e-04 |
| Klf10   | <i>Mus musculus</i> Kruppel-like factor 10 (Klf10), mRNA [NM_013692]                                               | 1.57  | 1.23e-05 | 9.86e-04 |
| Sym     | <i>Mus musculus</i> synemin, intermediate filament protein (Sym), transcript variant 1, mRNA [NM_201639]           | -1.42 | 1.23e-05 | 9.86e-04 |
| Nod1    | <i>Mus musculus</i> nucleotide-binding oligomerization domain containing 1 (Nod1), mRNA [NM_172729]                | -1.35 | 1.23e-05 | 9.86e-04 |
| Tsc22d1 | <i>Mus musculus</i> TSC22 domain family, member 1 (Tsc22d1), transcript variant 2, mRNA [NM_009366]                | 1.51  | 1.26e-05 | 9.96e-04 |
| Rps15   | <i>Mus musculus</i> ribosomal protein S15 (Rps15), mRNA [NM_009091]                                                | 0.91  | 1.26e-05 | 9.96e-04 |
| Pcolce  | <i>Mus musculus</i> procollagen C-endopeptidase enhancer protein (Pcolce), mRNA [NM_008788]                        | 1.33  | 1.26e-05 | 9.96e-04 |
| Phlda1  | <i>Mus musculus</i> pleckstrin homology-like domain, family A, member 1 (Phlda1), mRNA [NM_009344]                 | 1.12  | 1.26e-05 | 9.96e-04 |

**Table S6.** Common differentially expressed genes identified in the 4-week demyelinated *corpus callosum* and in the oligodendrocyte progenitor cell analysis.

| Symbol   | Gene name                                                                                  |
|----------|--------------------------------------------------------------------------------------------|
| Gdf15    | growth differentiation factor 15                                                           |
| Pigz     | phosphatidylinositol glycan anchor biosynthesis, class Z                                   |
| Trib3    | tribbles pseudokinase 3                                                                    |
| Ninj2    | ninjurin 2                                                                                 |
| Ccng1    | cyclin G1                                                                                  |
| Slc34a3  | solute carrier family 34 (sodium phosphate), member 3                                      |
| Atf5     | activating transcription factor 5                                                          |
| Xrcc3    | X-ray repair complementing defective repair in Chinese hamster cells 3                     |
| Ddit3    | DNA-damage inducible transcript 3                                                          |
| Moxd1    | monooxygenase, DBH-like 1                                                                  |
| Smtnl2   | smoothenin-like 2                                                                          |
| Ppp1r14a | protein phosphatase 1, regulatory inhibitor subunit 14A                                    |
| Sesn2    | sestrin 2                                                                                  |
| Cdkn1a   | cyclin-dependent kinase inhibitor 1A (P21)                                                 |
| Tmem125  | transmembrane protein 125                                                                  |
| Tmprss5  | transmembrane protease, serine 5 (spinesin)                                                |
| Slc7a5   | solute carrier family 7 (cationic amino acid transporter, y+ system), member 5             |
| Klf4     | Kruppel-like factor 4 (gut)                                                                |
| Eif4ebp1 | eukaryotic translation initiation factor 4E binding protein 1                              |
| Slc3a2   | solute carrier family 3 (activators of dibasic and neutral amino acid transport), member 2 |
| Arap2    | ArfGAP with RhoGAP domain, ankyrin repeat and PH domain 2                                  |
| Gzmm     | granzyme M (lymphocyte met-ase 1)                                                          |
| Sgk2     | serum/glucocorticoid regulated kinase 2                                                    |

|               |                                                                                               |
|---------------|-----------------------------------------------------------------------------------------------|
| Bbc3          | BCL2 binding component 3                                                                      |
| Nes           | nestin                                                                                        |
| Gas5          | growth arrest specific 5                                                                      |
| Fdps          | farnesyl diphosphate synthetase                                                               |
| Prima1        | proline rich membrane anchor 1                                                                |
| Serpinb1a     | serine (or cysteine) peptidase inhibitor, clade B, member 1a                                  |
| Ldlr          | low density lipoprotein receptor                                                              |
| Gjc2          | gap junction protein, gamma 2                                                                 |
| Ephx1         | epoxide hydrolase 1, microsomal                                                               |
| Ephx1         | epoxide hydrolase 1, microsomal                                                               |
| B230206H07Rik | RIKEN cDNA B230206H07 gene                                                                    |
| Hmgcs1        | 3-hydroxy-3-methylglutaryl-Coenzyme A synthase 1                                              |
| Galnt6        | polypeptide N-acetylgalactosaminyltransferase 6                                               |
| Galnt6        | polypeptide N-acetylgalactosaminyltransferase 6                                               |
| Nupr1         | nuclear protein transcription regulator 1                                                     |
| Adamts1       | a disintegrin-like and metallopeptidase (reprolysin type) with thrombospondin type 1 motif, 1 |
| Pcyt2         | phosphate cytidylyltransferase 2, ethanolamine                                                |
| Gadd45b       | growth arrest and DNA-damage-inducible 45 beta                                                |
| Nacad         | NAC alpha domain containing                                                                   |
| Klk6          | kallikrein related-peptidase 6                                                                |
| Tmeff1        | transmembrane protein with EGF-like and two follistatin-like domains 1                        |
| Mog           | myelin oligodendrocyte glycoprotein                                                           |
| Aen           | apoptosis enhancing nuclease                                                                  |
| Nmr1          | NmrA-like family domain containing 1                                                          |
| Rftn1         | raftlin lipid raft linker 1                                                                   |
| Eprs          | glutamyl-prolyl-tRNA synthetase                                                               |
| Nkain1        | Na <sup>+</sup> /K <sup>+</sup> transporting ATPase interacting 1                             |
| Fzd1          | frizzled class receptor 1                                                                     |
| Rps27l        | ribosomal protein S27-like                                                                    |
| Rhog          | ras homolog family member G                                                                   |
| Arrdc4        | arrestin domain containing 4                                                                  |
| Opalin        | oligodendrocytic myelin paranodal and inner loop protein                                      |
| Anln          | anillin, actin binding protein                                                                |
| Syt12         | synaptotagmin-like 2                                                                          |
| Ccl2          | chemokine (C-C motif) ligand 2                                                                |
| Gadd45a       | growth arrest and DNA-damage-inducible 45 alpha                                               |
| Prr18         | proline rich 18                                                                               |
| Synj2         | synaptojanin 2                                                                                |
| Ifrd1         | interferon-related developmental regulator 1                                                  |
| Adss1         | adenylosuccinate synthetase like 1                                                            |
| Kctd15        | potassium channel tetramerisation domain containing 15                                        |
| Ppp1r15a      | protein phosphatase 1, regulatory subunit 15A                                                 |
| Gal3st1       | galactose-3-O-sulfotransferase 1                                                              |
| Maff          | v-maf musculoaponeurotic fibrosarcoma oncogene family, protein F (avian)                      |
| Cntn2         | contactin 2                                                                                   |
| Nipal4        | NIPA-like domain containing 4                                                                 |
| Cdk18         | cyclin-dependent kinase 18                                                                    |
| Mgp           | matrix Gla protein                                                                            |
| Ptprd         | protein tyrosine phosphatase, receptor type, D                                                |
| Lgi3          | leucine-rich repeat LGI family, member 3                                                      |
| Tor3a         | torsin family 3, member A                                                                     |
| Mcam          | melanoma cell adhesion molecule                                                               |
| Fah           | fumarylacetoacetate hydrolase                                                                 |
| Rgs3          | regulator of G-protein signaling 3                                                            |
| Nfil3         | nuclear factor, interleukin 3, regulated                                                      |
| Mbp           | myelin basic protein                                                                          |
| Dhcr7         | 7-dehydrocholesterol reductase                                                                |
| Ano4          | anoctamin 4                                                                                   |
| Cyb5r2        | cytochrome b5 reductase 2                                                                     |
| Plekhh1       | pleckstrin homology domain containing, family H (with MyTH4 domain) member 1                  |
| Till7         | tubulin tyrosine ligase-like family, member 7                                                 |
| Runx1         | runt related transcription factor 1                                                           |
| Odc1          | ornithine decarboxylase, structural 1                                                         |
| Adamts14      | ADAMTS-like 4                                                                                 |

|               |                                                                |
|---------------|----------------------------------------------------------------|
| Gamt          | guanidinoacetate methyltransferase                             |
| Rasgrp3       | RAS, guanyl releasing protein 3                                |
| Cebpg         | CCAAT/enhancer binding protein (C/EBP), gamma                  |
| 1110038B12Rik | RIKEN cDNA 1110038B12 gene                                     |
| Cebpb         | CCAAT/enhancer binding protein (C/EBP), beta                   |
| Abca2         | ATP-binding cassette, sub-family A (ABC1), member 2            |
| Omg           | oligodendrocyte myelin glycoprotein                            |
| Tppp          | tubulin polymerization promoting protein                       |
| Mast4         | microtubule associated serine/threonine kinase family member 4 |
| Rasl12        | RAS-like, family 12                                            |

**Table S7.** Differentially expressed genes in human samples from multiple sclerosis plaques compared to control white matter from brain and spinal cord.

| Symbol   | Gene name                                                               | Log2 fold change | p-value  | Adjusted p-value |
|----------|-------------------------------------------------------------------------|------------------|----------|------------------|
| SIRT2    | sirtuin 2                                                               | -1.02            | 3.04e-07 | 7.07e-03         |
| NLGN3    | neuroligin 3                                                            | -0.98            | 5.34e-07 | 7.07e-03         |
| LDB3     | LIM domain binding 3                                                    | -0.71            | 1.01e-06 | 7.07e-03         |
| HAPLN2   | hyaluronan and proteoglycan link protein 2                              | -1.43            | 1.02e-06 | 7.07e-03         |
| PACS2    | phosphofurin acidic cluster sorting protein 2                           | -1.23            | 1.11e-06 | 7.07e-03         |
| CDYL2    | chromodomain Y like 2                                                   | 1.45             | 1.68e-06 | 7.07e-03         |
| ARHGAP23 | Rho GTPase activating protein 23                                        | -1.08            | 2.41e-06 | 7.07e-03         |
| RAPGEF5  | Rap guanine nucleotide exchange factor 5                                | -1.13            | 2.60e-06 | 7.07e-03         |
| PPP3CA   | protein phosphatase 3 catalytic subunit alpha                           | 1.98             | 2.72e-06 | 7.07e-03         |
| RECQL    | RecQ like helicase                                                      | 0.97             | 2.84e-06 | 7.07e-03         |
| BACE1    | beta-secretase 1                                                        | -1.22            | 3.00e-06 | 7.07e-03         |
| TTYH2    | tweety family member 2                                                  | -1.09            | 3.50e-06 | 7.07e-03         |
| SHTN1    | shootin 1                                                               | -0.69            | 3.58e-06 | 7.07e-03         |
| HS2ST1   | heparan sulfate 2-O-sulfotransferase 1                                  | 1.77             | 3.59e-06 | 7.07e-03         |
| RFFL     | ring finger and FYVE like domain containing E3 ubiquitin protein ligase | -1.11            | 3.81e-06 | 7.07e-03         |
| PPP3CA   | protein phosphatase 3 catalytic subunit alpha                           | 2.70             | 3.86e-06 | 7.07e-03         |
| BACE1    | beta-secretase 1                                                        | -1.17            | 4.01e-06 | 7.07e-03         |
| LDLRAP1  | low density lipoprotein receptor adaptor protein 1                      | -1.43            | 4.08e-06 | 7.07e-03         |
| BVES     | blood vessel epicardial substance                                       | -1.19            | 4.20e-06 | 7.07e-03         |
| PAQR4    | progesterone and adipoQ receptor family member 4                        | -1.17            | 4.32e-06 | 7.07e-03         |
| WIPF1    | WAS/WASL interacting protein family member 1                            | -1.00            | 4.62e-06 | 7.19e-03         |
| MTSS1    | MTSS I-BAR domain containing 1                                          | -0.89            | 6.88e-06 | 1.02e-02         |
| SORT1    | sortilin 1                                                              | -0.62            | 7.95e-06 | 1.05e-02         |
| GJC2     | gap junction protein gamma 2                                            | -0.95            | 8.04e-06 | 1.05e-02         |
| PLOD3    | procollagen-lysine,2-oxoglutarate 5-dioxygenase 3                       | -1.01            | 1.08e-05 | 1.27e-02         |
| FA2H     | fatty acid 2-hydroxylase                                                | -1.69            | 1.08e-05 | 1.27e-02         |
| LHPP     | phospholysine                                                           | -1.34            | 1.08e-05 | 1.27e-02         |

|          |                                                          |       |          |          |
|----------|----------------------------------------------------------|-------|----------|----------|
|          | phosphohistidine inorganic pyrophosphate phosphatase     |       |          |          |
| PKP4     | plakophilin 4                                            | -0.99 | 1.33e-05 | 1.43e-02 |
| PRIMA1   | proline rich membrane anchor 1                           | -1.71 | 1.35e-05 | 1.43e-02 |
| ELAVL3   | ELAV like RNA binding protein 3                          | -1.10 | 1.36e-05 | 1.43e-02 |
| WBP4     | WW domain binding protein 4                              | 1.86  | 1.51e-05 | 1.47e-02 |
| BRCC3    | BRCA1/BRCA2-containing complex subunit 3                 | 1.19  | 1.53e-05 | 1.47e-02 |
| PNMA2    | PNMA family member 2                                     | 1.68  | 1.56e-05 | 1.47e-02 |
| AHNAK2   | AHNAK nucleoprotein 2                                    | 1.26  | 1.57e-05 | 1.47e-02 |
| SLC25A13 | solute carrier family 25 member 13                       | -1.42 | 1.87e-05 | 1.67e-02 |
| PLEKHB1  | pleckstrin homology domain containing B1                 | -0.78 | 1.91e-05 | 1.67e-02 |
| RILPL1   | Rab interacting lysosomal protein like 1                 | -0.84 | 1.94e-05 | 1.67e-02 |
| GLTP     | glycolipid transfer protein                              | -1.38 | 2.14e-05 | 1.79e-02 |
| TP53INP2 | tumor protein p53 inducible nuclear protein 2            | -1.30 | 2.31e-05 | 1.89e-02 |
| PPM1L    | protein phosphatase, Mg2+/Mn2+ dependent 1L              | 1.27  | 2.62e-05 | 2.07e-02 |
| MBP      | myelin basic protein                                     | -1.26 | 2.77e-05 | 2.07e-02 |
| ARHGEF3  | Rho guanine nucleotide exchange factor 3                 | 1.56  | 2.77e-05 | 2.07e-02 |
| CERS6    | ceramide synthase 6                                      | 1.27  | 2.79e-05 | 2.07e-02 |
| CANX     | calnexin                                                 | 1.45  | 2.92e-05 | 2.12e-02 |
| LIPE     | lipase E, hormone sensitive type                         | -1.13 | 3.00e-05 | 2.13e-02 |
| CDK18    | cyclin dependent kinase 18                               | -1.29 | 3.09e-05 | 2.15e-02 |
| DPYSL5   | dihydropyrimidinase like 5                               | -1.08 | 3.20e-05 | 2.18e-02 |
| BOK      | BCL2 family apoptosis regulator BOK                      | -1.49 | 3.29e-05 | 2.19e-02 |
| ATP6V1C1 | ATPase H+ transporting V1 subunit C1                     | 1.08  | 3.54e-05 | 2.29e-02 |
| UNC5C    | unc-5 netrin receptor C                                  | -1.24 | 3.71e-05 | 2.29e-02 |
| KIF1C    | kinesin family member 1C                                 | -0.91 | 3.71e-05 | 2.29e-02 |
| GNG7     | G protein subunit gamma 7                                | -0.96 | 3.74e-05 | 2.29e-02 |
| SNX22    | sorting nexin 22                                         | -0.95 | 3.83e-05 | 2.29e-02 |
| ARHGAP26 | Rho GTPase activating protein 26                         | 1.75  | 3.85e-05 | 2.29e-02 |
| AFMID    | arylformamidase                                          | -0.68 | 3.96e-05 | 2.31e-02 |
| FAM102A  | family with sequence similarity 102 member A             | -0.96 | 4.05e-05 | 2.31e-02 |
| PIP4K2A  | phosphatidylinositol-5-phosphate 4-kinase type 2 alpha   | -0.95 | 4.10e-05 | 2.31e-02 |
| S1PR5    | sphingosine-1-phosphate receptor 5                       | -1.78 | 4.27e-05 | 2.35e-02 |
| FRMD6    | FERM domain containing 6                                 | 1.65  | 4.35e-05 | 2.35e-02 |
| SOX10    | SRY-box transcription factor 10                          | -1.17 | 4.46e-05 | 2.35e-02 |
| ZNF770   | zinc finger protein 770                                  | 1.45  | 4.46e-05 | 2.35e-02 |
| FCSK     | fucose kinase                                            | -0.87 | 4.53e-05 | 2.35e-02 |
| UBIAD1   | UbiA prenyltransferase domain containing 1               | -0.58 | 4.74e-05 | 2.41e-02 |
| MAPK8IP1 | mitogen-activated protein kinase 8 interacting protein 1 | -1.27 | 4.92e-05 | 2.41e-02 |
| SSBP2    | single stranded DNA binding protein 2                    | 1.17  | 4.95e-05 | 2.41e-02 |
| LPAR1    | lysophosphatidic acid receptor 1                         | -1.40 | 5.16e-05 | 2.41e-02 |

|          |                                                          |       |          |          |
|----------|----------------------------------------------------------|-------|----------|----------|
| LCN2     | lipocalin 2                                              | -0.45 | 5.20e-05 | 2.41e-02 |
| JPT2     | Jupiter microtubule associated homolog 2                 | -1.30 | 5.24e-05 | 2.41e-02 |
| PHF20L1  | PHD finger protein 20 like 1                             | 2.10  | 5.28e-05 | 2.41e-02 |
| PLEKHH1  | pleckstrin homology, MyTH4 and FERM domain containing H1 | -1.61 | 5.52e-05 | 2.41e-02 |
| LMF1     | lipase maturation factor 1                               | -1.07 | 5.54e-05 | 2.41e-02 |
| DBNDD2   | dysbindin domain containing 2                            | -1.17 | 5.59e-05 | 2.41e-02 |
| TLE6     | TLE family member 6, subcortical maternal complex member | -0.37 | 5.64e-05 | 2.41e-02 |
| SH3PXD2A | SH3 and PX domains 2A                                    | -0.63 | 5.65e-05 | 2.41e-02 |
| MARCKSL1 | MARCKS like 1                                            | -0.90 | 5.74e-05 | 2.41e-02 |
| TMEM63A  | transmembrane protein 63A                                | -0.94 | 5.90e-05 | 2.44e-02 |
| EFHD1    | EF-hand domain family member D1                          | -0.95 | 6.01e-05 | 2.45e-02 |
| APC      | APC regulator of WNT signaling pathway                   | 1.61  | 6.22e-05 | 2.51e-02 |
| HAGLR    | HOXD antisense growth-associated long non-coding RNA     | -1.64 | 6.32e-05 | 2.52e-02 |
| FAM234A  | family with sequence similarity 234 member A             | -0.95 | 6.47e-05 | 2.52e-02 |
| SF3B1    | splicing factor 3b subunit 1                             | 1.20  | 6.47e-05 | 2.52e-02 |
| OLIG1    | oligodendrocyte transcription factor 1                   | -1.37 | 6.67e-05 | 2.54e-02 |
| XK       | X-linked Kx blood group                                  | 1.74  | 6.81e-05 | 2.54e-02 |
| ARHGEF37 | Rho guanine nucleotide exchange factor 37                | -1.28 | 6.86e-05 | 2.54e-02 |
| AIF1L    | allograft inflammatory factor 1 like                     | -1.45 | 6.89e-05 | 2.54e-02 |
| NACAD    | NAC alpha domain containing                              | -1.02 | 6.93e-05 | 2.54e-02 |
| PAIP2B   | poly(A) binding protein interacting protein 2B           | -1.49 | 7.15e-05 | 2.56e-02 |
| CD22     | CD22 molecule                                            | -0.91 | 7.19e-05 | 2.56e-02 |
| RASSF2   | Ras association domain family member 2                   | -1.47 | 7.58e-05 | 2.62e-02 |
| MAP4     | microtubule associated protein 4                         | -0.91 | 7.61e-05 | 2.62e-02 |
| TMEM150C | transmembrane protein 150C                               | 1.57  | 7.77e-05 | 2.65e-02 |
| VWA1     | von Willebrand factor A domain containing 1              | -0.79 | 7.88e-05 | 2.65e-02 |
| APLP1    | amyloid beta precursor like protein 1                    | -1.04 | 8.27e-05 | 2.70e-02 |
| PRKCSH   | protein kinase C substrate 80K-H                         | -0.98 | 8.35e-05 | 2.70e-02 |
| REEP3    | receptor accessory protein 3                             | -1.12 | 8.92e-05 | 2.83e-02 |
| MBNL2    | muscleblind like splicing regulator 2                    | -0.86 | 9.05e-05 | 2.85e-02 |
| CEP85    | centrosomal protein 85                                   | -0.55 | 9.29e-05 | 2.86e-02 |
| SLC6A19  | solute carrier family 6 member 19                        | -0.51 | 9.32e-05 | 2.86e-02 |
| CDKN1C   | cyclin dependent kinase inhibitor 1C                     | -1.16 | 9.37e-05 | 2.86e-02 |
| FCHO1    | FCH and mu domain containing endocytic adaptor 1         | -0.57 | 9.53e-05 | 2.87e-02 |
| SYNJ2    | synaptojanin 2                                           | -1.48 | 9.64e-05 | 2.87e-02 |

|         |                                                            |       |          |          |
|---------|------------------------------------------------------------|-------|----------|----------|
| SEPTIN6 | septin 6                                                   | 1.05  | 9.69e-05 | 2.87e-02 |
| LLGL1   | LLGL scribble cell polarity complex component 1            | -0.86 | 9.76e-05 | 2.87e-02 |
| LRRC8D  | leucine rich repeat containing 8 VRAC subunit D            | -1.14 | 9.91e-05 | 2.87e-02 |
| ATP11A  | ATPase phospholipid transporting 11A                       | -0.54 | 9.94e-05 | 2.87e-02 |
| CADPS2  | calcium dependent secretion activator 2                    | 1.85  | 1.05e-04 | 3.00e-02 |
| LZTS2   | leucine zipper tumor suppressor 2                          | -0.62 | 1.06e-04 | 3.00e-02 |
| CAPRIN2 | caprin family member 2                                     | 1.19  | 1.07e-04 | 3.01e-02 |
| MTPN    | myotrophin                                                 | 0.65  | 1.08e-04 | 3.01e-02 |
| TJAP1   | tight junction associated protein 1                        | -0.94 | 1.09e-04 | 3.01e-02 |
| ST3GAL4 | ST3 beta-galactoside alpha-2,3-sialyltransferase 4         | -0.53 | 1.14e-04 | 3.09e-02 |
| SPARCL1 | SPARC like 1                                               | 0.97  | 1.16e-04 | 3.09e-02 |
| TMEM125 | transmembrane protein 125                                  | -2.01 | 1.16e-04 | 3.09e-02 |
| PTPRH   | protein tyrosine phosphatase receptor type H               | -0.93 | 1.18e-04 | 3.09e-02 |
| KIF6    | kinesin family member 6                                    | -0.80 | 1.19e-04 | 3.09e-02 |
| GAB2    | GRB2 associated binding protein 2                          | -0.82 | 1.19e-04 | 3.09e-02 |
| SMAD5   | SMAD family member 5                                       | 1.84  | 1.20e-04 | 3.09e-02 |
| SEMA4D  | semaphorin 4D                                              | -1.56 | 1.20e-04 | 3.09e-02 |
| ZNF148  | zinc finger protein 148                                    | 1.35  | 1.22e-04 | 3.09e-02 |
| PIAS1   | protein inhibitor of activated STAT 1                      | 0.99  | 1.23e-04 | 3.09e-02 |
| SLC44A1 | solute carrier family 44 member 1                          | -0.89 | 1.30e-04 | 3.19e-02 |
| MYRF    | myelin regulatory factor                                   | -1.27 | 1.31e-04 | 3.19e-02 |
| SP3     | Sp3 transcription factor                                   | 1.75  | 1.32e-04 | 3.20e-02 |
| SEMA6A  | semaphorin 6A                                              | -0.81 | 1.36e-04 | 3.23e-02 |
| SLC48A1 | solute carrier family 48 member 1                          | -0.80 | 1.38e-04 | 3.23e-02 |
| TRIM62  | tripartite motif containing 62                             | -0.57 | 1.38e-04 | 3.23e-02 |
| PAQR6   | progesterin and adipoQ receptor family member 6            | -0.77 | 1.39e-04 | 3.23e-02 |
| GABRG1  | gamma-aminobutyric acid type A receptor subunit gamma1     | 1.91  | 1.39e-04 | 3.23e-02 |
| SEPTIN8 | septin 8                                                   | -1.23 | 1.42e-04 | 3.24e-02 |
| NBN     | nibrin                                                     | 1.09  | 1.43e-04 | 3.25e-02 |
| CPD     | carboxypeptidase D                                         | -1.11 | 1.45e-04 | 3.27e-02 |
| DHCR24  | 24-dehydrocholesterol reductase                            | -1.06 | 1.47e-04 | 3.28e-02 |
| PGPEP1  | pyroglutamyl-peptidase I                                   | -0.74 | 1.47e-04 | 3.28e-02 |
| AGBL5   | ATP/GTP binding protein like 5                             | 1.04  | 1.50e-04 | 3.31e-02 |
| RBBP9   | RB binding protein 9, serine hydrolase                     | -1.10 | 1.51e-04 | 3.31e-02 |
| NKAIN2  | sodium/potassium transporting ATPase interacting 2         | -1.18 | 1.52e-04 | 3.31e-02 |
| PLEKHA5 | pleckstrin homology domain containing A5                   | 1.95  | 1.53e-04 | 3.31e-02 |
| OBI1    | ORC ubiquitin ligase 1                                     | 1.17  | 1.54e-04 | 3.31e-02 |
| DNTTIP2 | deoxynucleotidyltransferase terminal interacting protein 2 | 1.11  | 1.55e-04 | 3.31e-02 |
| PLCL2   | phospholipase C like 2                                     | 1.67  | 1.58e-04 | 3.35e-02 |
| LRRC6   | leucine rich repeat containing 6                           | 1.10  | 1.61e-04 | 3.36e-02 |

|          |                                                                      |       |          |          |
|----------|----------------------------------------------------------------------|-------|----------|----------|
| PTPRO    | protein tyrosine phosphatase receptor type O                         | 1.38  | 1.62e-04 | 3.36e-02 |
| NCAM1    | neural cell adhesion molecule 1                                      | -1.33 | 1.62e-04 | 3.36e-02 |
| SLC5A11  | solute carrier family 5 member 11                                    | -1.58 | 1.64e-04 | 3.39e-02 |
| ZHX1     | zinc fingers and homeoboxes 1                                        | 1.10  | 1.65e-04 | 3.39e-02 |
| JAM3     | junctional adhesion molecule 3                                       | -0.76 | 1.67e-04 | 3.41e-02 |
| RBMS3    | RNA binding motif single stranded interacting protein 3              | 3.41  | 1.69e-04 | 3.43e-02 |
| SLC6A9   | solute carrier family 6 member 9                                     | -1.01 | 1.70e-04 | 3.44e-02 |
| ZNF488   | zinc finger protein 488                                              | -1.11 | 1.71e-04 | 3.44e-02 |
| NKX2-2   | NK2 homeobox 2                                                       | -1.79 | 1.73e-04 | 3.45e-02 |
| PXK      | PX domain containing serine/threonine kinase like                    | -1.07 | 1.75e-04 | 3.46e-02 |
| INTS6    | integrator complex subunit 6                                         | 1.22  | 1.76e-04 | 3.46e-02 |
| TMC6     | transmembrane channel like 6                                         | -1.23 | 1.79e-04 | 3.50e-02 |
| PBX1     | PBX homeobox 1                                                       | 1.07  | 1.83e-04 | 3.53e-02 |
| SEC23A   | Sec23 homolog A, COPII coat complex component                        | 1.29  | 1.84e-04 | 3.54e-02 |
| DAAM1    | dishevelled associated activator of morphogenesis 1                  | 2.16  | 1.86e-04 | 3.56e-02 |
| POLR2J4  | RNA polymerase II subunit J4, pseudogene                             | -0.91 | 1.88e-04 | 3.58e-02 |
| C10orf90 | chromosome 10 open reading frame 90                                  | -1.37 | 1.92e-04 | 3.62e-02 |
| GPR37    | G protein-coupled receptor 37                                        | -1.13 | 1.93e-04 | 3.62e-02 |
| RASAL1   | RAS protein activator like 1                                         | -0.32 | 1.97e-04 | 3.64e-02 |
| TRIM69   | tripartite motif containing 69                                       | 0.76  | 1.97e-04 | 3.64e-02 |
| PPM1A    | protein phosphatase, Mg <sup>2+</sup> /Mn <sup>2+</sup> dependent 1A | 1.31  | 1.97e-04 | 3.64e-02 |
| RCN1     | reticulocalbin 1                                                     | 1.15  | 1.99e-04 | 3.64e-02 |
| TBC1D24  | TBC1 domain family member 24                                         | 0.84  | 2.01e-04 | 3.64e-02 |
| GM2A     | GM2 ganglioside activator                                            | -0.92 | 2.01e-04 | 3.64e-02 |
| FGD6     | FYVE, RhoGEF and PH domain containing 6                              | 0.52  | 2.03e-04 | 3.64e-02 |
| CHMP3    | charged multivesicular body protein 3                                | 1.37  | 2.04e-04 | 3.64e-02 |
| SETDB2   | SET domain bifurcated histone lysine methyltransferase 2             | 0.80  | 2.08e-04 | 3.69e-02 |
| MOBP     | myelin associated oligodendrocyte basic protein                      | -1.43 | 2.10e-04 | 3.71e-02 |
| UGT8     | UDP glycosyltransferase 8                                            | -1.61 | 2.12e-04 | 3.72e-02 |
| PEX16    | peroxisomal biogenesis factor 16                                     | -0.61 | 2.13e-04 | 3.72e-02 |
| CNTN2    | contactin 2                                                          | -1.25 | 2.24e-04 | 3.90e-02 |
| NHS      | NHS actin remodeling regulator                                       | 1.62  | 2.27e-04 | 3.91e-02 |
| TRAK2    | trafficking kinesin protein 2                                        | -0.94 | 2.30e-04 | 3.91e-02 |
| FAM124A  | family with sequence similarity 124 member A                         | -1.02 | 2.30e-04 | 3.91e-02 |
| KANK1    | KN motif and ankyrin repeat domains 1                                | -0.57 | 2.32e-04 | 3.91e-02 |
| ATP2B1   | ATPase plasma membrane Ca <sup>2+</sup> transporting 1               | 1.68  | 2.33e-04 | 3.91e-02 |
| CDC42EP2 | CDC42 effector protein 2                                             | -0.75 | 2.35e-04 | 3.91e-02 |
| SKIL     | SKI like proto-oncogene                                              | 1.64  | 2.35e-04 | 3.91e-02 |
| PPIG     | peptidylprolyl isomerase G                                           | 1.50  | 2.40e-04 | 3.98e-02 |
| ABI2     | abl interactor 2                                                     | 0.97  | 2.45e-04 | 4.01e-02 |

|          |                                                                                  |       |          |          |
|----------|----------------------------------------------------------------------------------|-------|----------|----------|
| SCD      | stearoyl-CoA desaturase                                                          | -1.13 | 2.47e-04 | 4.01e-02 |
| GPATCH2  | G-patch domain containing 2                                                      | 1.42  | 2.48e-04 | 4.01e-02 |
| PPP2R5C  | protein phosphatase 2 regulatory subunit B'gamma                                 | 1.13  | 2.48e-04 | 4.01e-02 |
| SEMA4C   | semaphorin 4C                                                                    | -0.60 | 2.50e-04 | 4.02e-02 |
| PLPP2    | phospholipid phosphatase 2                                                       | -1.30 | 2.51e-04 | 4.02e-02 |
| FOXC2    | forkhead box C2                                                                  | -0.54 | 2.54e-04 | 4.03e-02 |
| TPRN     | taperin                                                                          | -0.78 | 2.55e-04 | 4.03e-02 |
| SHROOM3  | shroom family member 3                                                           | 0.83  | 2.57e-04 | 4.03e-02 |
| FGD5-AS1 | FGD5 antisense RNA 1                                                             | -0.49 | 2.59e-04 | 4.03e-02 |
| RPS6KA2  | ribosomal protein S6 kinase A2                                                   | -0.68 | 2.61e-04 | 4.03e-02 |
| ANKRD50  | ankyrin repeat domain 50                                                         | 1.53  | 2.61e-04 | 4.03e-02 |
| TMEM161A | transmembrane protein 161A                                                       | -0.62 | 2.64e-04 | 4.03e-02 |
| KAZN     | kazrin, periplakin interacting protein                                           | -0.59 | 2.64e-04 | 4.03e-02 |
| SLC7A2   | solute carrier family 7 member 2                                                 | 1.59  | 2.65e-04 | 4.03e-02 |
| TUBB4A   | tubulin beta 4A class IVa                                                        | -1.03 | 2.68e-04 | 4.04e-02 |
| MFHAS1   | malignant fibrous histiocytoma amplified sequence 1                              | 0.94  | 2.70e-04 | 4.04e-02 |
| CHADL    | chondroadherin like                                                              | -1.26 | 2.70e-04 | 4.04e-02 |
| CLMN     | calmin                                                                           | -0.79 | 2.72e-04 | 4.07e-02 |
| PCBP4    | poly(rC) binding protein 4                                                       | -0.90 | 2.74e-04 | 4.08e-02 |
| MAVS     | mitochondrial antiviral signaling protein                                        | -0.53 | 2.77e-04 | 4.09e-02 |
| PPP1CB   | protein phosphatase 1 catalytic subunit beta                                     | 0.90  | 2.78e-04 | 4.09e-02 |
| BCAS1    | brain enriched myelin associated protein 1                                       | -1.05 | 2.80e-04 | 4.10e-02 |
| GPIHBP1  | glycosylphosphatidylinositol anchored high density lipoprotein binding protein 1 | -1.79 | 2.83e-04 | 4.11e-02 |
| RAB3GAP1 | RAB3 GTPase activating protein catalytic subunit 1                               | 1.03  | 2.86e-04 | 4.11e-02 |
| SMAD1    | SMAD family member 1                                                             | 2.13  | 2.86e-04 | 4.11e-02 |
| FEZ1     | fasciculation and elongation protein zeta 1                                      | -0.84 | 2.87e-04 | 4.11e-02 |
| KITLG    | KIT ligand                                                                       | 2.01  | 2.94e-04 | 4.17e-02 |
| ASPA     | aspartoacylase                                                                   | -0.92 | 2.94e-04 | 4.17e-02 |
| TNS1     | tensin 1                                                                         | -0.98 | 2.97e-04 | 4.18e-02 |
| GUCY1B1  | guanylate cyclase 1 soluble subunit beta 1                                       | 0.90  | 3.04e-04 | 4.27e-02 |
| SDHAF1   | succinate dehydrogenase complex assembly factor 1                                | -0.79 | 3.09e-04 | 4.30e-02 |
| PIEZO2   | piezo type mechanosensitive ion channel component 2                              | -1.54 | 3.10e-04 | 4.30e-02 |
| NDUFS7   | NADH:ubiquinone oxidoreductase core subunit S7                                   | -0.82 | 3.10e-04 | 4.30e-02 |
| SEC63    | SEC63 homolog, protein translocation regulator                                   | 1.10  | 3.15e-04 | 4.34e-02 |
| DNAH17   | dynein axonemal heavy chain 17                                                   | -1.83 | 3.16e-04 | 4.34e-02 |
| SNTB2    | syntrophin beta 2                                                                | 1.51  | 3.28e-04 | 4.47e-02 |
| CBX5     | chromobox 5                                                                      | 0.94  | 3.30e-04 | 4.47e-02 |
| ANKLE2   | ankyrin repeat and LEM domain containing 2                                       | -0.79 | 3.31e-04 | 4.47e-02 |
| GJB1     | gap junction protein beta 1                                                      | -1.14 | 3.32e-04 | 4.47e-02 |
| JUP      | junction plakoglobin                                                             | -0.70 | 3.34e-04 | 4.47e-02 |
| SNX13    | sorting nexin 13                                                                 | 1.87  | 3.38e-04 | 4.50e-02 |

|           |                                                |       |          |          |
|-----------|------------------------------------------------|-------|----------|----------|
| NCEH1     | neutral cholesterol ester hydrolase 1          | 2.43  | 3.41e-04 | 4.53e-02 |
| NENF      | neudesin neurotrophic factor                   | -0.85 | 3.43e-04 | 4.54e-02 |
| CCDC14    | coiled-coil domain containing 14               | 1.53  | 3.46e-04 | 4.56e-02 |
| TTLL11    | tubulin tyrosine ligase like 11                | -0.92 | 3.48e-04 | 4.56e-02 |
| EPHA5     | EPH receptor A5                                | 1.61  | 3.49e-04 | 4.56e-02 |
| GNAL      | G protein subunit alpha L                      | 1.53  | 3.50e-04 | 4.56e-02 |
| BBS7      | Bardet-Biedl syndrome 7                        | 1.56  | 3.59e-04 | 4.64e-02 |
| H2AJ      | H2A.J histone                                  | -0.98 | 3.63e-04 | 4.67e-02 |
| ARHGEF2   | Rho/Rac guanine nucleotide exchange factor 2   | -0.89 | 3.64e-04 | 4.67e-02 |
| NDUFA4L2  | NDUFA4 mitochondrial complex associated like 2 | -0.62 | 3.67e-04 | 4.68e-02 |
| QKI       | QKI, KH domain containing RNA binding          | -1.65 | 3.71e-04 | 4.70e-02 |
| GTF2IRD2B | GTF2I repeat domain containing 2B              | -0.66 | 3.72e-04 | 4.70e-02 |
| AKAP8L    | A-kinase anchoring protein 8 like              | -0.36 | 3.75e-04 | 4.70e-02 |
| WNK1      | WNK lysine deficient protein kinase 1          | -0.75 | 3.75e-04 | 4.70e-02 |
| SSH3      | slingshot protein phosphatase 3                | -0.48 | 3.78e-04 | 4.70e-02 |
| FRY       | FRY microtubule binding protein                | 1.40  | 3.78e-04 | 4.70e-02 |
| GAL3ST1   | galactose-3-O-sulfotransferase 1               | -0.79 | 3.84e-04 | 4.75e-02 |
| LINC01315 | long intergenic non-protein coding RNA 1315    | -1.05 | 3.85e-04 | 4.75e-02 |
| EFR3A     | EFR3 homolog A                                 | 1.59  | 3.87e-04 | 4.75e-02 |
| NR2F1-AS1 | NR2F1 antisense RNA 1                          | 1.06  | 3.88e-04 | 4.75e-02 |
| RASGRP3   | RAS guanyl releasing protein 3                 | -1.52 | 3.95e-04 | 4.82e-02 |
| ZNF391    | zinc finger protein 391                        | 1.46  | 4.02e-04 | 4.88e-02 |
| CLDN11    | claudin 11                                     | -0.75 | 4.04e-04 | 4.88e-02 |
| ANXA11    | annexin A11                                    | 0.64  | 4.07e-04 | 4.88e-02 |
| PCGF5     | polycomb group ring finger 5                   | 1.91  | 4.08e-04 | 4.88e-02 |

|         |                                                                 |       |          |          |
|---------|-----------------------------------------------------------------|-------|----------|----------|
| YIF1B   | Yip1 interacting factor homolog B, membrane trafficking protein | -0.94 | 4.15e-04 | 4.95e-02 |
| MVB12B  | multivesicular body subunit 12B                                 | -0.94 | 4.17e-04 | 4.95e-02 |
| NR3C2   | nuclear receptor subfamily 3 group C member 2                   | 1.16  | 4.18e-04 | 4.95e-02 |
| TRIM41  | tripartite motif containing 41                                  | -0.81 | 4.24e-04 | 4.98e-02 |
| CERS2   | ceramide synthase 2                                             | -1.01 | 4.24e-04 | 4.98e-02 |
| BCL2L11 | BCL2 like 11                                                    | -0.48 | 4.26e-04 | 4.99e-02 |
| SNRPC   | small nuclear ribonucleoprotein polypeptide C                   | -0.73 | 4.28e-04 | 4.99e-02 |

**Table S8.** Common differentially expressed genes identified in the human multiple sclerosis and in the oligodendrocyte progenitor cell analyses.

| Symbol   | Gene name                                                                                                                                                                                  |
|----------|--------------------------------------------------------------------------------------------------------------------------------------------------------------------------------------------|
| S1pr5    | <i>Mus musculus</i> sphingosine-1-phosphate receptor 5 (S1pr5), mRNA [NM_053190]                                                                                                           |
| Efhd1    | <i>Mus musculus</i> EF hand domain containing 1 (Efhd1), mRNA [NM_028889]                                                                                                                  |
| Synj2    | <i>Mus musculus</i> synaptojanin 2 (Synj2), transcript variant 3, mRNA [NM_011523]                                                                                                         |
| Slc5a11  | <i>Mus musculus</i> solute carrier family 5 (sodium/glucose cotransporter), member 11 (Slc5a11), mRNA [NM_146198]                                                                          |
| Sort1    | <i>Mus musculus</i> sortilin 1 (Sort1), mRNA [NM_019972]                                                                                                                                   |
| Aspa     | <i>Mus musculus</i> aspartoacylase (Aspa), mRNA [NM_023113]                                                                                                                                |
| Jam3     | <i>Mus musculus</i> junction adhesion molecule 3 (Jam3), mRNA [NM_023277]                                                                                                                  |
| Daam1    | <i>Mus musculus</i> dishevelled associated activator of morphogenesis 1 (Daam1), transcript variant 1, mRNA [NM_026102]                                                                    |
| Ptpro    | <i>Mus musculus</i> protein tyrosine phosphatase, receptor type, O (Ptpro), transcript variant 1, mRNA [NM_011216]                                                                         |
| Cdkn1c   | <i>Mus musculus</i> cyclin-dependent kinase inhibitor 1C (P57) (Cdkn1c), transcript variant 2, mRNA [NM_009876]                                                                            |
| Fa2h     | <i>Mus musculus</i> fatty acid 2-hydroxylase (Fa2h), mRNA [NM_178086]                                                                                                                      |
| Slc25a13 | <i>Mus musculus</i> solute carrier family 25 (mitochondrial carrier, adenine nucleotide translocator), member 13 (Slc25a13), nuclear gene encoding mitochondrial protein, mRNA [NM_015829] |
| Tle6     | <i>Mus musculus</i> transducin-like enhancer of split 6, homolog of Drosophila E(spl) (Tle6), mRNA [NM_053254]                                                                             |
| Clmn     | <i>Mus musculus</i> calmin (Clmn), transcript variant 1, mRNA [NM_053155]                                                                                                                  |
| Gjc2     | <i>Mus musculus</i> gap junction protein, gamma 2 (Gjc2), transcript variant 2, mRNA [NM_175452]                                                                                           |
| Rasa1    | <i>Mus musculus</i> RAS protein activator like 1 (GAP1 like) (Rasa1), mRNA [NM_013832]                                                                                                     |
| Pcgf5    | <i>Mus musculus</i> polycomb group ring finger 5 (Pcgf5), mRNA [NM_029508]                                                                                                                 |
| Aif1l    | <i>Mus musculus</i> allograft inflammatory factor 1-like (Aif1l), mRNA [NM_145144]                                                                                                         |
| Rassf2   | <i>Mus musculus</i> Ras association (RalGDS/AF-6) domain family member 2 (Rassf2), mRNA [NM_175445]                                                                                        |
| Cdk18    | <i>Mus musculus</i> cyclin-dependent kinase 18 (Cdk18), mRNA [NM_008795]                                                                                                                   |
| Wnk1     | <i>Mus musculus</i> WNK lysine deficient protein kinase 1 (Wnk1), transcript variant 1, mRNA [NM_198703]                                                                                   |

|          |                                                                                                                                            |
|----------|--------------------------------------------------------------------------------------------------------------------------------------------|
| Kank1    | <i>Mus musculus</i> KN motif and ankyrin repeat domains 1 (Kank1), mRNA [NM_181404]                                                        |
| Elavl3   | <i>Mus musculus</i> ELAV (embryonic lethal, abnormal vision, <i>Drosophila</i> )-like 3 (Hu antigen C) (Elavl3), mRNA [NM_010487]          |
| Mobp     | <i>Mus musculus</i> myelin-associated oligodendrocytic basic protein (Mobp), transcript variant 3, mRNA [NM_001039365]                     |
| Fez1     | <i>Mus musculus</i> fasciculation and elongation protein zeta 1 (zygin I) (Fez1), mRNA [NM_183171]                                         |
| Kif6     | <i>Mus musculus</i> kinesin family member 6 (Kif6), mRNA [NM_177052]                                                                       |
| Prima1   | <i>Mus musculus</i> proline rich membrane anchor 1 (Prima1), mRNA [NM_133364]                                                              |
| Slc44a1  | <i>Mus musculus</i> solute carrier family 44, member 1 (Slc44a1), transcript variant 1, mRNA [NM_133891]                                   |
| Paqr4    | <i>Mus musculus</i> progesterin and adipoQ receptor family member IV (Paqr4), mRNA [NM_023824]                                             |
| Epha5    | <i>Mus musculus</i> Eph receptor A5 (Epha5), mRNA [NM_007937]                                                                              |
| Paqr6    | <i>Mus musculus</i> progesterin and adipoQ receptor family member VI (Paqr6), mRNA [NM_198410]                                             |
| Gal3st1  | <i>Mus musculus</i> galactose-3-O-sulfotransferase 1 (Gal3st1), mRNA [NM_016922]                                                           |
| Rapgef5  | <i>Mus musculus</i> Rap guanine nucleotide exchange factor (GEF) 5 (Rapgef5), mRNA [NM_175930]                                             |
| Cdc42ep2 | <i>Mus musculus</i> CDC42 effector protein (Rho GTPase binding) 2 (Cdc42ep2), mRNA [NM_026772]                                             |
| Fam102a  | <i>Mus musculus</i> family with sequence similarity 102, member A (Fam102a), mRNA [NM_153560]                                              |
| Reep3    | <i>Mus musculus</i> receptor accessory protein 3 (Reep3), mRNA [NM_178606]                                                                 |
| Cpd      | <i>Mus musculus</i> carboxypeptidase D (Cpd), mRNA [NM_007754]                                                                             |
| Rasgrp3  | <i>Mus musculus</i> RAS, guanyl releasing protein 3 (Rasgrp3), transcript variant 2, mRNA [NM_207246]                                      |
| Tmem125  | <i>Mus musculus</i> transmembrane protein 125 (Tmem125), mRNA [NM_172383]                                                                  |
| Tmem63a  | <i>Mus musculus</i> transmembrane protein 63a (Tmem63a), mRNA [NM_144794]                                                                  |
| Lpar1    | <i>Mus musculus</i> lysophosphatidic acid receptor 1 (Lpar1), transcript variant 2, mRNA [NM_172989]                                       |
| Plekhh1  | <i>Mus musculus</i> pleckstrin homology domain containing, family H (with MyTH4 domain) member 1 (Plekhh1), mRNA [NM_181073]               |
| Tmem161a | <i>Mus musculus</i> transmembrane protein 161A (Tmem161a), mRNA [NM_145597]                                                                |
| Atp11a   | <i>Mus musculus</i> ATPase, class VI, type 11A (Atp11a), mRNA [NM_015804]                                                                  |
| Cntn2    | <i>Mus musculus</i> contactin 2 (Cntn2), mRNA [NM_177129]                                                                                  |
| Jup      | <i>Mus musculus</i> junction plakoglobin (Jup), mRNA [NM_010593]                                                                           |
| Arhgef2  | <i>Mus musculus</i> rho/rac guanine nucleotide exchange factor (GEF) 2 (Arhgef2), mRNA [NM_008487]                                         |
| Tmc6     | <i>Mus musculus</i> transmembrane channel-like gene family 6 (Tmc6), transcript variant 2, mRNA [NM_181321]                                |
| Chadl    | <i>Mus musculus</i> chondroadherin-like (Chadl), mRNA [NM_001164320]                                                                       |
| Lzts2    | <i>Mus musculus</i> leucine zipper, putative tumor suppressor 2 (Lzts2), transcript variant 1, mRNA [NM_145503]                            |
| Cd22     | <i>Mus musculus</i> CD22 antigen (Cd22), transcript variant 1, mRNA [NM_001043317]                                                         |
| Plekhhb1 | <i>Mus musculus</i> pleckstrin homology domain containing, family B (evectins) member 1 (Plekhhb1), transcript variant 1, mRNA [NM_013746] |
| Slc6a9   | <i>Mus musculus</i> solute carrier family 6 (neurotransmitter transporter, glycine), member 9 (Slc6a9), mRNA [NM_008135]                   |
| Ttyh2    | <i>Mus musculus</i> tweety homolog 2 ( <i>Drosophila</i> ) (Ttyh2), mRNA [NM_053273]                                                       |
| Sdhaf1   | <i>Mus musculus</i> succinate dehydrogenase complex assembly factor 1 (Sdhaf1), mRNA [NM_001033140]                                        |
| Hapln2   | <i>Mus musculus</i> hyaluronan and proteoglycan link protein 2 (Hapln2), mRNA [NM_022031]                                                  |
| Pip4k2a  | <i>Mus musculus</i> phosphatidylinositol-5-phosphate 4-kinase, type II, alpha (Pip4k2a), mRNA [NM_008845]                                  |
| St3gal4  | <i>Mus musculus</i> ST3 beta-galactoside alpha-2,3-sialyltransferase 4 (St3gal4), mRNA [NM_009178]                                         |
| Cadps2   | <i>Mus musculus</i> Ca <sup>2+</sup> -dependent activator protein for secretion 2 (Cadps2), mRNA [NM_153163]                               |
| Ppp2r5c  | <i>Mus musculus</i> protein phosphatase 2, regulatory subunit B (B56), gamma isoform (Ppp2r5c), transcript variant 4, mRNA [NM_001135001]  |

|        |                                                                                                                                                                 |
|--------|-----------------------------------------------------------------------------------------------------------------------------------------------------------------|
| Lmf1   | <i>Mus musculus</i> lipase maturation factor 1 (Lmf1), mRNA [NM_029624]                                                                                         |
| Fgd6   | <i>Mus musculus</i> FYVE, RhoGEF and PH domain containing 6 (Fgd6), mRNA [NM_053072]                                                                            |
| Sirt2  | <i>Mus musculus</i> sirtuin 2 (silent mating type information regulation 2, homolog) 2 ( <i>S. cerevisiae</i> ) (Sirt2), transcript variant 1, mRNA [NM_022432] |
| Mbp    | <i>Mus musculus</i> myelin basic protein (Mbp), transcript variant 7, mRNA [NM_010777]                                                                          |
| Yif1b  | <i>Mus musculus</i> Yip1 interacting factor homolog B ( <i>S. cerevisiae</i> ) (Yif1b), transcript variant 1, mRNA [NM_029887]                                  |
| Nacad  | <i>Mus musculus</i> NAC alpha domain containing (Nacad), mRNA [NM_001081652]                                                                                    |
| Rbbp9  | <i>Mus musculus</i> retinoblastoma binding protein 9 (Rbbp9), mRNA [NM_015754]                                                                                  |
| Nkain2 | <i>Mus musculus</i> Na transporting ATPase interacting 2 (Nkain2), transcript variant 2, mRNA [NM_001025286]                                                    |
| Gltp   | <i>Mus musculus</i> glycolipid transfer protein (Gltp), mRNA [NM_019821]                                                                                        |
| Ldb3   | <i>Mus musculus</i> LIM domain binding 3 (Ldb3), transcript variant 1, mRNA [NM_011918]                                                                         |
| Rilpl1 | <i>Mus musculus</i> Rab interacting lysosomal protein-like 1 (Rilpl1), mRNA [NM_021430]                                                                         |
| Mbnl2  | <i>Mus musculus</i> muscleblind-like 2 (Mbnl2), transcript variant 1, mRNA [NM_175341]                                                                          |

**Table S9.** Common differentially expressed genes identified in the human multiple sclerosis and in the *corpus callosum* analyses.

| Symbol   | Gene name                                                                    |
|----------|------------------------------------------------------------------------------|
| Tmem125  | transmembrane protein 125                                                    |
| Prima1   | proline rich membrane anchor 1                                               |
| Gjc2     | gap junction protein, gamma 2                                                |
| Nacad    | NAC alpha domain containing                                                  |
| Mapk8ip1 | mitogen-activated protein kinase 8 interacting protein 1                     |
| Synj2    | synaptojanin 2                                                               |
| Gal3st1  | galactose-3-O-sulfotransferase 1                                             |
| Cntn2    | contactin 2                                                                  |
| Cdk18    | cyclin-dependent kinase 18                                                   |
| Mbp      | myelin basic protein                                                         |
| Plekhh1  | pleckstrin homology domain containing, family H (with MyTH4 domain) member 1 |
| Rasgrp3  | RAS, guanyl releasing protein 3                                              |
| Aplp1    | amyloid beta (A4) precursor-like protein 1                                   |

**Table S10.** Common differentially expressed genes identified in the human multiple sclerosis analysis, in the 4-week *corpus callosum* analysis and in the oligodendrocyte progenitor cells analysis.

| Symbol  | Description                                                                                           |
|---------|-------------------------------------------------------------------------------------------------------|
| Synj2   | <i>Mus musculus</i> synaptojanin 2 (Synj2), transcript variant 3, mRNA [NM_011523]                    |
| Gjc2    | <i>Mus musculus</i> gap junction protein, gamma 2 (Gjc2), transcript variant 2, mRNA [NM_175452]      |
| Cdk18   | <i>Mus musculus</i> cyclin-dependent kinase 18 (Cdk18), mRNA [NM_008795]                              |
| Prima1  | <i>Mus musculus</i> proline rich membrane anchor 1 (Prima1), mRNA [NM_133364]                         |
| Gal3st1 | <i>Mus musculus</i> galactose-3-O-sulfotransferase 1 (Gal3st1), mRNA [NM_016922]                      |
| Rasgrp3 | <i>Mus musculus</i> RAS, guanyl releasing protein 3 (Rasgrp3), transcript variant 2, mRNA [NM_207246] |

|         |                                                                                                                              |
|---------|------------------------------------------------------------------------------------------------------------------------------|
| Tmem125 | <i>Mus musculus</i> transmembrane protein 125 (Tmem125), mRNA [NM_172383]                                                    |
| Plekhh1 | <i>Mus musculus</i> pleckstrin homology domain containing, family H (with MyTH4 domain) member 1 (Plekhh1), mRNA [NM_181073] |
| Cntn2   | <i>Mus musculus</i> contactin 2 (Cntn2), mRNA [NM_177129]                                                                    |
| Mbp     | <i>Mus musculus</i> myelin basic protein (Mbp), transcript variant 7, mRNA [NM_010777]                                       |
| Nacad   | <i>Mus musculus</i> NAC alpha domain containing (Nacad), mRNA [NM_001081652]                                                 |

**Table S11.** Differentially expressed genes in *corpus callosum* from mice which underwent remyelination compared to mice treated with cuprizone for 2 weeks.

| Symbol     | Gene Name                                                                                                      | Log2 fold change | p-value  | Adjusted p-value |
|------------|----------------------------------------------------------------------------------------------------------------|------------------|----------|------------------|
| D16Ert472e | DNA segment, Chr 16, ERATODoi 472, expressed                                                                   | 1.97             | 4.11E-06 | 2.74E-02         |
| Aoc1       | amine oxidase, copper-containing 1                                                                             | 1.66             | 4.95E-06 | 2.74E-02         |
| Krt15      | keratin 15                                                                                                     | 1.76             | 6.14E-06 | 2.74E-02         |
| Serpinb1c  | serine (or cysteine) peptidase inhibitor, clade B, member 1c                                                   | 1.92             | 7.42E-06 | 2.74E-02         |
| Slain1     | SLAIN motif family, member 1                                                                                   | 2.02             | 1.05E-05 | 2.74E-02         |
| Cxcl10     | chemokine (C-X-C motif) ligand 10                                                                              | 1.3              | 1.35E-05 | 2.74E-02         |
| Sntn       | sentan, cilia apical structure protein                                                                         | 1.63             | 1.36E-05 | 2.74E-02         |
| Lrig3      | leucine-rich repeats and immunoglobulin-like domains 3                                                         | 1.56             | 1.39E-05 | 2.74E-02         |
| Ppfibp2    | PTPRF interacting protein, bindingprotein 2 (liprin beta 2)                                                    | 1.95             | 1.58E-05 | 2.74E-02         |
| Dusp15     | dual specificity phosphatase-like 15                                                                           | 1.29             | 1.65E-05 | 2.74E-02         |
| Gng11      | guanine nucleotide binding protein(G protein), gamma 11                                                        | 2.07             | 1.65E-05 | 2.74E-02         |
| Plp        | plasma membrane proteolipid                                                                                    | 1.34             | 1.71E-05 | 2.74E-02         |
| Wnt3       | wingless-type MMTV integrationsite family, member 3                                                            | 2.03             | 1.73E-05 | 2.74E-02         |
| Mcam       | melanoma cell adhesion molecule                                                                                | 1.47             | 1.74E-05 | 2.74E-02         |
| D16Ert472e | DNA segment, Chr 16, ERATO Doi 472, expressed                                                                  | 1.96             | 1.77E-05 | 2.74E-02         |
| Creb5      | cAMP responsive element binding protein 5                                                                      | 1.47             | 1.97E-05 | 2.74E-02         |
| Insc       | INSC spindle orientation adaptorprotein                                                                        | 2.11             | 2.33E-05 | 2.74E-02         |
| Bfsp2      | beaded filament structural protein 2, phakinin                                                                 | 2.08             | 2.43E-05 | 2.74E-02         |
| Pls1       | plastin 1 (I-isoform)                                                                                          | 2.26             | 2.74E-05 | 2.74E-02         |
| Otd7b      | OTU domain containing 7B                                                                                       | 1.56             | 2.93E-05 | 2.74E-02         |
| St6galnac3 | ST6 (alpha-N-acetyl-neuraminyl-2,3-beta-galactosyl-1,3)-N- acetylgalactosaminide alpha-2,6-sialyltransferase 3 | 1.74             | 3.07E-05 | 2.74E-02         |
| Plekbg3    | pleckstrin homology domain containing, family G (with RhoGef domain) member 3                                  | 2.64             | 3.90E-05 | 2.74E-02         |

|         |                                                                                 |       |          |          |
|---------|---------------------------------------------------------------------------------|-------|----------|----------|
| P3h4    | prolyl 3-hydroxylase family member 4 (non-enzymatic)                            | 1.95  | 4.06E-05 | 2.74E-02 |
| P3h4    | prolyl 3-hydroxylase family member 4 (non-enzymatic)                            | 1.61  | 4.07E-05 | 2.74E-02 |
| Slc4a2  | solute carrier family 4 (anion exchanger), member 2                             | 1.78  | 4.13E-05 | 2.74E-02 |
| Ifit3   | interferon-induced protein with tetratricopeptide repeats 3                     | 1.15  | 4.40E-05 | 2.74E-02 |
| Sox8    | SRY (sex determining region Y)-box 8                                            | 1.49  | 4.55E-05 | 2.74E-02 |
| Plaat3  | phospholipase A and acyltransferase 3                                           | 2.05  | 4.58E-05 | 2.74E-02 |
| Sox10   | SRY (sex determining region Y)-box 10                                           | 1.38  | 4.64E-05 | 2.74E-02 |
| Sox10   | SRY (sex determining region Y)-box 10                                           | 1.96  | 4.71E-05 | 2.74E-02 |
| Elovl7  | ELOVL family member 7, elongation of long chain fatty acids (yeast)             | 2.22  | 4.71E-05 | 2.74E-02 |
| Plekhh1 | pleckstrin homology domain containing, family H (with MyTH4 domain) member 1    | 1.63  | 4.81E-05 | 2.74E-02 |
| Lrrc74b | leucine rich repeat containing 74B                                              | 1.62  | 4.85E-05 | 2.74E-02 |
| Emilin3 | elastin microfibril interfacer 3                                                | 1.58  | 4.90E-05 | 2.74E-02 |
| Prkcq   | protein kinase C, theta                                                         | 1.7   | 5.07E-05 | 2.74E-02 |
| Tnfrsf6 | tumor necrosis factor alpha induced protein 6                                   | 2.38  | 5.08E-05 | 2.74E-02 |
| Gab1    | growth factor receptor bound protein 2-associated protein 1                     | 1.58  | 5.21E-05 | 2.74E-02 |
| Bfsp2   | beaded filament structural protein 2, phakinin                                  | 1.82  | 5.32E-05 | 2.74E-02 |
| Uox     | urate oxidase                                                                   | 1.53  | 5.34E-05 | 2.74E-02 |
| Il12rb1 | interleukin 12 receptor, beta 1                                                 | 2.51  | 5.37E-05 | 2.74E-02 |
| Gjb1    | gap junction protein, beta 1                                                    | 1.84  | 5.50E-05 | 2.74E-02 |
| Ppfbp2  | PTPRF interacting protein, binding protein 2 (liprin beta 2)                    | 1.85  | 5.69E-05 | 2.74E-02 |
| Elovl7  | ELOVL family member 7, elongation of long chain fatty acids (yeast)             | 2.35  | 6.07E-05 | 2.74E-02 |
| Dock5   | dedicator of cytokinesis 5                                                      | 2.27  | 6.21E-05 | 2.74E-02 |
| Tmem163 | transmembrane protein 163                                                       | 1.69  | 6.27E-05 | 2.74E-02 |
| Fkbp5   | FK506 binding protein 5                                                         | -1.76 | 6.39E-05 | 2.74E-02 |
| Gsn     | gelsolin                                                                        | 2.45  | 6.54E-05 | 2.74E-02 |
| Mrgprf  | MAS-related GPR, member F                                                       | 1.36  | 6.66E-05 | 2.74E-02 |
| Sema6a  | sema domain, transmembrane domain (TM), and cytoplasmic domain, (semaphorin) 6A | 1.9   | 6.77E-05 | 2.74E-02 |
| B3gnt9  | UDP-GlcNAc:betaGal beta-1,3-N-acetylglucosaminyltransferase 9                   | 2.35  | 6.83E-05 | 2.74E-02 |
| Emilin2 | elastin microfibril interfacer 2                                                | 1.34  | 6.83E-05 | 2.74E-02 |
| Prkcq   | protein kinase C, theta                                                         | 2.15  | 6.84E-05 | 2.74E-02 |
| Cnksr3  | Cnksr family member 3                                                           | 1.37  | 7.29E-05 | 2.74E-02 |

|               |                                                                                |      |          |          |
|---------------|--------------------------------------------------------------------------------|------|----------|----------|
| Cd8b1         | CD8 antigen, beta chain 1                                                      | 1.55 | 7.33E-05 | 2.74E-02 |
| Cd59a         | CD59a antigen                                                                  | 1.51 | 7.37E-05 | 2.74E-02 |
| Car2          | carbonic anhydrase 2                                                           | 2.57 | 7.44E-05 | 2.74E-02 |
| Iigp1         | interferon inducible GTPase 1                                                  | 1.21 | 7.50E-05 | 2.74E-02 |
| Rgs3          | regulator of G-protein signaling 3                                             | 1.67 | 7.56E-05 | 2.74E-02 |
| Serinc5       | serine incorporator 5                                                          | 1.57 | 7.80E-05 | 2.74E-02 |
| Rgs3          | regulator of G-protein signaling 3                                             | 1.14 | 7.89E-05 | 2.74E-02 |
| Rnf43         | ring finger protein 43                                                         | 1.62 | 8.05E-05 | 2.74E-02 |
| Enpp6         | ectonucleotide<br>pyrophosphatase/phosphodiesterase6                           | 1.67 | 8.07E-05 | 2.74E-02 |
| Kif13a        | kinesin family member 13A                                                      | 1.02 | 8.08E-05 | 2.74E-02 |
| D16Ert472e    | DNA segment, Chr 16, ERATO<br>Doi 472, expressed                               | 1.56 | 8.13E-05 | 2.74E-02 |
| Enpp3         | ectonucleotide<br>pyrophosphatase/phosphodiesterase3                           | 1.04 | 8.15E-05 | 2.74E-02 |
| Unc5b         | unc-5 netrin receptor B                                                        | 2.39 | 8.25E-05 | 2.74E-02 |
| Klhl4         | kelch-like 4                                                                   | 1.65 | 8.27E-05 | 2.74E-02 |
| Trim59        | tripartite motif-containing 59                                                 | 2.54 | 8.30E-05 | 2.74E-02 |
| Gpr37         | G protein-coupled receptor 37                                                  | 2.48 | 8.40E-05 | 2.74E-02 |
| Insc          | INSC spindle orientation adaptor<br>protein                                    | 2.39 | 8.40E-05 | 2.74E-02 |
| E330034G19Rik | RIKEN cDNA E330034G19 gene                                                     | 1.26 | 8.43E-05 | 2.74E-02 |
| Bche          | butyrylcholinesterase                                                          | 1.78 | 8.56E-05 | 2.74E-02 |
| Gramd3        | GRAM domain containing 3                                                       | 1.3  | 8.67E-05 | 2.74E-02 |
| Lpar1         | lysophosphatidic acid receptor 1                                               | 2.77 | 8.76E-05 | 2.74E-02 |
| 5031410I06Rik | RIKEN cDNA 5031410I06 gene                                                     | 1.27 | 9.25E-05 | 2.74E-02 |
| Pleckhh1      | pleckstrin homology domain<br>containing, family H (with MyTH4domain) member 1 | 2.56 | 9.36E-05 | 2.74E-02 |
| Fgfr2         | fibroblast growth factor receptor 2                                            | 1.37 | 9.34E-05 | 2.74E-02 |
| Rhobtb3       | Rho-related BTB domain<br>containing 3                                         | 1.44 | 9.44E-05 | 2.74E-02 |
| Nipal4        | NIPA-like domain containing 4                                                  | 2.22 | 9.46E-05 | 2.74E-02 |
| Chdh          | choline dehydrogenase                                                          | 1.45 | 9.47E-05 | 2.74E-02 |
| Gtsf11        | gametocyte specific factor 1-like                                              | 1.38 | 9.48E-05 | 2.74E-02 |
| Efhd1         | EF hand domain containing 1                                                    | 1.89 | 9.53E-05 | 2.74E-02 |
| Ado           | 2-aminoethanethiol (cysteamine)<br>dioxygenase                                 | 1.36 | 9.55E-05 | 2.74E-02 |
| Trp53bp2      | transformation related protein 53binding protein 2                             | 1.25 | 9.61E-05 | 2.74E-02 |
| Lgals2        | lectin, galactose-binding, soluble 2                                           | 1.3  | 9.63E-05 | 2.74E-02 |
| Aif1l         | allograft inflammatory factor 1-like                                           | 1.85 | 9.70E-05 | 2.74E-02 |
| Sspn          | sarcospan                                                                      | 1.55 | 9.77E-05 | 2.74E-02 |
| Tmem98        | transmembrane protein 98                                                       | 2.61 | 9.88E-05 | 2.74E-02 |
| E030046B03Rik | RIKEN cDNA E030046B03 gene                                                     | 1.2  | 1.00E-04 | 2.75E-02 |
| Cryab         | crystallin, alpha B                                                            | 2.2  | 1.04E-04 | 2.81E-02 |
| Arhgef10      | Rho guanine nucleotide exchange<br>factor (GEF) 10                             | 1.63 | 1.09E-04 | 2.81E-02 |

|               |                                                                                              |      |          |          |
|---------------|----------------------------------------------------------------------------------------------|------|----------|----------|
| Eml1          | echinoderm microtubule associated protein like 1                                             | 1.4  | 1.10E-04 | 2.81E-02 |
| Gjc3          | gap junction protein, gamma 3                                                                | 1.96 | 1.11E-04 | 2.81E-02 |
| Nkg7          | natural killer cell group 7 sequence                                                         | 1.22 | 1.14E-04 | 2.81E-02 |
| Btd           | biotinidase                                                                                  | 1.18 | 1.14E-04 | 2.81E-02 |
| Gprc5b        | G protein-coupled receptor, familyC, group 5, member B                                       | 1.54 | 1.14E-04 | 2.81E-02 |
| Arrdc3        | arrestin domain containing 3                                                                 | 1.49 | 1.17E-04 | 2.81E-02 |
| Tmcc3         | transmembrane and coiled coil domains 3                                                      | 1.76 | 1.18E-04 | 2.81E-02 |
| Enpp4         | ectonucleotide pyrophosphatase/phosphodiesterase 4                                           | 1.55 | 1.19E-04 | 2.81E-02 |
| Thbs4         | thrombospondin 4                                                                             | 1.56 | 1.20E-04 | 2.81E-02 |
| St18          | suppression of tumorigenicity 18                                                             | 1.58 | 1.20E-04 | 2.81E-02 |
| Plekhb1       | pleckstrin homology domain containing, family B (evectins)member 1                           | 2.38 | 1.24E-04 | 2.81E-02 |
| Adamts4       | a disintegrin-like and metallopeptidase (reprolysin type) with thrombospondin type 1 motif,4 | 2.2  | 1.24E-04 | 2.81E-02 |
| Fam183b       | family with sequence similarity 183, member B                                                | 1.72 | 1.25E-04 | 2.81E-02 |
| Cxcr6         | chemokine (C-X-C motif) receptor 6                                                           | 1.19 | 1.26E-04 | 2.81E-02 |
| Fa2h          | fatty acid 2-hydroxylase                                                                     | 3.35 | 1.28E-04 | 2.81E-02 |
| Ermp1         | endoplasmic reticulum metallopeptidase 1                                                     | 1.34 | 1.28E-04 | 2.81E-02 |
| Prrg1         | proline rich Gla (G- carboxyglutamic acid) 1                                                 | 2.07 | 1.30E-04 | 2.81E-02 |
| Sirt2         | sirtuin 2                                                                                    | 1.33 | 1.35E-04 | 2.84E-02 |
| Rftn2         | raftlin family member 2                                                                      | 1.16 | 1.36E-04 | 2.84E-02 |
| Phldb1        | pleckstrin homology like domain,family B, member 1                                           | 2.5  | 1.38E-04 | 2.85E-02 |
| Rnf122        | ring finger protein 122                                                                      | 1.77 | 1.41E-04 | 2.87E-02 |
| Ddc           | dopa decarboxylase                                                                           | 1.98 | 1.41E-04 | 2.87E-02 |
| Fnbp1         | formin binding protein 1                                                                     | 1.59 | 1.45E-04 | 2.88E-02 |
| Slc44a1       | solute carrier family 44, member 1                                                           | 2.5  | 1.49E-04 | 2.88E-02 |
| Tmbim1        | transmembrane BAX inhibitor motif containing 1                                               | 1.51 | 1.49E-04 | 2.88E-02 |
| I600029I14Rik | RIKEN cDNA 1600029I14 gene                                                                   | 2.31 | 1.52E-04 | 2.88E-02 |
| Crnde         | colorectal neoplasia differentiallyexpressed (non-protein coding)                            | 1.23 | 1.53E-04 | 2.88E-02 |
| Scd2          | stearoyl-Coenzyme A desaturase 2                                                             | 1.2  | 1.53E-04 | 2.88E-02 |
| Ugt8a         | UDP galactosyltransferase 8A                                                                 | 3.24 | 1.54E-04 | 2.88E-02 |
| Msx1          | msh homeobox 1                                                                               | 1.3  | 1.56E-04 | 2.88E-02 |
| Fbxo32        | F-box protein 32                                                                             | 1.47 | 1.56E-04 | 2.88E-02 |
| Tppp3         | tubulin polymerization-promotingprotein family member 3                                      | 2.41 | 1.57E-04 | 2.88E-02 |
| Lrrc1         | leucine rich repeat containing 1                                                             | 1.22 | 1.58E-04 | 2.88E-02 |
| Ephb1         | Eph receptor B1                                                                              | 1.15 | 1.58E-04 | 2.88E-02 |

|               |                                                               |      |          |          |
|---------------|---------------------------------------------------------------|------|----------|----------|
| Carhsp1       | calcium regulated heat stable protein 1                       | 1.92 | 1.59E-04 | 2.88E-02 |
| Tnni1         | troponin I, skeletal, slow 1                                  | 1.86 | 1.61E-04 | 2.88E-02 |
| Fah           | fumarylacetoacetate hydrolase                                 | 1.84 | 1.62E-04 | 2.88E-02 |
| Plpp2         | phospholipid phosphatase 2                                    | 1.19 | 1.70E-04 | 2.98E-02 |
| Sh3tc2        | SH3 domain and tetratricopeptiderepeats 2                     | 1.58 | 1.71E-04 | 2.98E-02 |
| Pde8a         | phosphodiesterase 8A                                          | 2.51 | 1.73E-04 | 2.98E-02 |
| Mkrn3         | makorin, ring finger protein, 3                               | 1.23 | 1.73E-04 | 2.98E-02 |
| Slc12a2       | solute carrier family 12, member 2                            | 1.76 | 1.75E-04 | 2.98E-02 |
| Oxsr1         | oxidative-stress responsive 1                                 | 1.24 | 1.76E-04 | 2.98E-02 |
| Dbn1d2        | dysbindin (dystrobrevin bindingprotein 1) domain containing 2 | 1.67 | 1.83E-04 | 2.98E-02 |
| Erich3        | glutamate rich 3                                              | 1.5  | 1.84E-04 | 2.98E-02 |
| Fam216b       | family with sequence similarity 216, member B                 | 1.76 | 1.84E-04 | 2.98E-02 |
| Olig1         | oligodendrocyte transcription factor 1                        | 1.86 | 1.84E-04 | 2.98E-02 |
| Tlcd3a        | TLC domain containing 3A                                      | 1.34 | 1.87E-04 | 2.98E-02 |
| Fbxo36        | F-box protein 36                                              | 1.57 | 1.87E-04 | 2.98E-02 |
| Fam166b       | family with sequence similarity 166, member B                 | 1.74 | 1.90E-04 | 2.98E-02 |
| Jam3          | junction adhesion molecule 3                                  | 1.68 | 1.90E-04 | 2.98E-02 |
| Myo1d         | myosin ID                                                     | 1.7  | 1.91E-04 | 2.98E-02 |
| Sox2ot        | SOX2 overlapping transcript (non-protein coding)              | 2.1  | 1.93E-04 | 2.98E-02 |
| Cmtm5         | CKLF-like MARVEL transmembrane domain containing5             | 1.99 | 1.93E-04 | 2.98E-02 |
| Ncam1         | neural cell adhesion molecule 1                               | 1.57 | 1.92E-04 | 2.98E-02 |
| Gal3st1       | galactose-3-O-sulfotransferase 1                              | 2.44 | 1.95E-04 | 2.99E-02 |
| Olf1341       | olfactory receptor 1341                                       | 3.32 | 1.96E-04 | 2.99E-02 |
| Trim13        | tripartite motif-containing 13                                | 1.62 | 2.01E-04 | 2.99E-02 |
| Efs           | embryonal Fyn-associated substrate                            | 1.12 | 2.01E-04 | 2.99E-02 |
| Serp1b1b      | serine (or cysteine) peptidase inhibitor, clade B, member 1b  | 2.13 | 2.01E-04 | 2.99E-02 |
| Il17rb        | interleukin 17 receptor B                                     | 1.86 | 2.01E-04 | 2.99E-02 |
| Fhdc1         | FH2 domain containing 1                                       | 1.18 | 2.03E-04 | 2.99E-02 |
| Arsg          | arylsulfatase G                                               | 2.34 | 2.06E-04 | 2.99E-02 |
| Vipr2         | vasoactive intestinal peptide receptor 2                      | 1.47 | 2.05E-04 | 2.99E-02 |
| A930003A15Rik | RIKEN cDNA A930003A15 gene                                    | 1.53 | 2.05E-04 | 2.99E-02 |
| Serp1d1       | serine (or cysteine) peptidaseinhibitor, clade D, member 1    | 2.69 | 2.18E-04 | 3.09E-02 |
| Tprn          | taperin                                                       | 2.07 | 2.17E-04 | 3.09E-02 |
| Tmem229a      | transmembrane protein 229A                                    | 1.29 | 2.17E-04 | 3.09E-02 |
| Kcnk13        | potassium channel, subfamily K, member 13                     | 1.52 | 2.21E-04 | 3.10E-02 |
| 1500015L24Rik | RIKEN cDNA 1500015L24 gene                                    | 1.45 | 2.22E-04 | 3.10E-02 |
| Mobp          | myelin-associated oligodendrocytic basic protein              | 3.39 | 2.26E-04 | 3.10E-02 |

|          |                                                                   |       |          |          |
|----------|-------------------------------------------------------------------|-------|----------|----------|
| Cd3d     | CD3 antigen, delta polypeptide                                    | 1.28  | 2.24E-04 | 3.10E-02 |
| Smim1    | small integral membrane protein 1                                 | 1.28  | 2.26E-04 | 3.10E-02 |
| Car14    | carbonic anhydrase 14                                             | 2.66  | 2.29E-04 | 3.12E-02 |
| Ccdc33   | coiled-coil domain containing 33                                  | 1.56  | 2.36E-04 | 3.15E-02 |
| Nkain1   | Na <sup>+</sup> /K <sup>+</sup> transporting ATPase interacting 1 | 1.29  | 2.37E-04 | 3.15E-02 |
| Rassf9   | Ras association (RalGDS/AF-6)domain family (N-terminal) member 9  | 1.32  | 2.38E-04 | 3.15E-02 |
| Hhip     | Hedgehog-interacting protein                                      | 1.23  | 2.38E-04 | 3.15E-02 |
| Apod     | apolipoprotein D                                                  | 2.21  | 2.40E-04 | 3.15E-02 |
| Hhatl    | hedgehog acyltransferase-like                                     | 1.6   | 2.39E-04 | 3.15E-02 |
| Gpr62    | G protein-coupled receptor 62                                     | 2.79  | 2.41E-04 | 3.15E-02 |
| Csrp1    | cysteine and glycine-rich protein 1                               | 2.08  | 2.46E-04 | 3.17E-02 |
| Tjp2     | tight junction protein 2                                          | 1.23  | 2.50E-04 | 3.17E-02 |
| Cnp      | 2',3'-cyclic nucleotide 3' phosphodiesterase                      | 2.97  | 2.54E-04 | 3.17E-02 |
| Olfml1   | olfactomedin-like 1                                               | 1.62  | 2.52E-04 | 3.17E-02 |
| Marchf8  | membrane associated ring-CH-type finger 8                         | 1.4   | 2.53E-04 | 3.17E-02 |
| Rffl     | ring finger and FYVE like domaincontaining protein                | 1.84  | 2.53E-04 | 3.17E-02 |
| Edil3    | EGF-like repeats and discoidin I-like domains 3                   | 1.35  | 2.58E-04 | 3.18E-02 |
| Gjc2     | gap junction protein, gamma 2                                     | 2.24  | 2.61E-04 | 3.18E-02 |
| Gss      | glutathione synthetase                                            | 1.31  | 2.61E-04 | 3.18E-02 |
| Tmem88b  | transmembrane protein 88B                                         | 3.02  | 2.63E-04 | 3.18E-02 |
| Dhx40    | DEAH (Asp-Glu-Ala-His) box polypeptide 40                         | 0.99  | 2.63E-04 | 3.18E-02 |
| Fndc11   | fibronectin type III domain containing 11                         | 1.41  | 2.63E-04 | 3.18E-02 |
| Tsnaxip1 | translin-associated factor X (Tsnax)interacting protein 1         | 0.94  | 2.66E-04 | 3.19E-02 |
| Cobl11   | Cobl-like 1                                                       | 1.27  | 2.67E-04 | 3.19E-02 |
| Nol3     | nucleolar protein 3 (apoptosis repressor with CARD domain)        | 1.16  | 2.69E-04 | 3.19E-02 |
| Psrc1    | proline/serine-rich coiled-coil 1                                 | -1.18 | 2.70E-04 | 3.19E-02 |
| Cavin3   | caveolae associated 3                                             | 1.02  | 2.72E-04 | 3.20E-02 |
| Cpox     | coproporphyrinogen oxidase                                        | 1.42  | 2.75E-04 | 3.22E-02 |
| Myb      | myeloblastosis oncogene                                           | 1.48  | 2.75E-04 | 3.22E-02 |
| Rnf7     | ring finger protein 7                                             | 1     | 2.77E-04 | 3.22E-02 |
| Usp18    | ubiquitin specific peptidase 18                                   | 1.5   | 2.79E-04 | 3.22E-02 |
| Ms4a4b   | membrane-spanning 4-domains,subfamily A, member 4B                | 1.46  | 2.85E-04 | 3.27E-02 |
| Itgb7    | integrin beta 7                                                   | 1     | 2.87E-04 | 3.28E-02 |
| Ddr1     | discoidin domain receptor family, member 1                        | 1.62  | 2.92E-04 | 3.29E-02 |
| Prima1   | proline rich membrane anchor 1                                    | 1.81  | 2.92E-04 | 3.29E-02 |
| Pcolce2  | procollagen C-endopeptidase enhancer 2                            | 1.52  | 2.96E-04 | 3.30E-02 |
| Plin5    | perilipin 5                                                       | 1.88  | 3.00E-04 | 3.30E-02 |

|         |                                                                  |       |          |          |
|---------|------------------------------------------------------------------|-------|----------|----------|
| Mfhas1  | malignant fibrous histiocytoma amplified sequence 1              | -0.79 | 3.00E-04 | 3.30E-02 |
| Apln    | apelin                                                           | 1.04  | 3.00E-04 | 3.30E-02 |
| Ak7     | adenylate kinase 7                                               | 1.4   | 3.06E-04 | 3.33E-02 |
| Mag     | myelin-associated glycoprotein                                   | 3.13  | 3.10E-04 | 3.33E-02 |
| Sgk2    | serum/glucocorticoid regulated kinase 2                          | 3.36  | 3.11E-04 | 3.33E-02 |
| Kank1   | KN motif and ankyrin repeat domains 1                            | 1.15  | 3.09E-04 | 3.33E-02 |
| Tspan15 | tetraspanin 15                                                   | 1.73  | 3.09E-04 | 3.33E-02 |
| Septin4 | septin 4                                                         | 2.34  | 3.16E-04 | 3.33E-02 |
| Snx33   | sorting nexin 33                                                 | 1.77  | 3.14E-04 | 3.33E-02 |
| Golga7  | golgi autoantigen, golgin subfamilya, 7                          | 1.29  | 3.20E-04 | 3.35E-02 |
| Ly6g6d  | lymphocyte antigen 6 complex, locus G6D                          | 1.51  | 3.22E-04 | 3.35E-02 |
| Slc20a2 | solute carrier family 20, member 2                               | 1.08  | 3.23E-04 | 3.35E-02 |
| Tcf7l2  | transcription factor 7 like 2, T cell specific, HMG box          | 1.1   | 3.24E-04 | 3.35E-02 |
| Abhd4   | abhydrolase domain containing 4                                  | 0.88  | 3.28E-04 | 3.38E-02 |
| Kat2b   | K(lysine) acetyltransferase 2B                                   | 0.98  | 3.34E-04 | 3.43E-02 |
| Qdpr    | quinoid dihydropteridine reductase                               | 2.48  | 3.38E-04 | 3.44E-02 |
| Fam83d  | family with sequence similarity 83, member D                     | 1.04  | 3.37E-04 | 3.44E-02 |
| Dnajb2  | DnaJ heat shock protein family (Hsp40) member B2                 | 1.7   | 3.41E-04 | 3.46E-02 |
| Sort1   | sortilin 1                                                       | 1.04  | 3.44E-04 | 3.46E-02 |
| Cilk1   | ciliogenesis associated kinase 1                                 | 1.37  | 3.47E-04 | 3.46E-02 |
| Trim36  | tripartite motif-containing 36                                   | 2     | 3.48E-04 | 3.46E-02 |
| Ctsk    | cathepsin K                                                      | 1.13  | 3.49E-04 | 3.47E-02 |
| Nkd1    | naked cuticle 1                                                  | 1.61  | 3.51E-04 | 3.47E-02 |
| Cep97   | centrosomal protein 97                                           | 1.35  | 3.58E-04 | 3.51E-02 |
| Sccpdh  | saccharopine dehydrogenase (putative)                            | 1.37  | 3.60E-04 | 3.51E-02 |
| Ppp1r32 | protein phosphatase 1, regulatory subunit 32                     | 1.71  | 3.62E-04 | 3.51E-02 |
| Syt9    | synaptotagmin IX                                                 | 1.18  | 3.67E-04 | 3.51E-02 |
| Fmn12   | formin-like 2                                                    | 0.82  | 3.68E-04 | 3.51E-02 |
| Lef1    | lymphoid enhancer binding factor 1                               | 1.05  | 3.70E-04 | 3.52E-02 |
| Tspan2  | tetraspanin 2                                                    | 2.94  | 3.72E-04 | 3.52E-02 |
| Gstm7   | glutathione S-transferase, mu 7                                  | 1.42  | 3.81E-04 | 3.59E-02 |
| En2     | engrailed 2                                                      | 1.13  | 3.82E-04 | 3.59E-02 |
| Spg20   | spastic paraplegia 20, spartin (Troyer syndrome) homolog (human) | 1.3   | 3.85E-04 | 3.60E-02 |
| Mboat1  | membrane bound O-acyltransferase domain containing 1             | 2.2   | 3.88E-04 | 3.61E-02 |
| Mtarc1  | mitochondrial amidoxime reducing component 1                     | 1.39  | 3.89E-04 | 3.61E-02 |

|           |                                                                                 |       |          |          |
|-----------|---------------------------------------------------------------------------------|-------|----------|----------|
| Cyp2j11   | cytochrome P450, family 2,subfamily j, polypeptide 11                           | 1.09  | 3.90E-04 | 3.61E-02 |
| S1pr5     | sphingosine-1-phosphate receptor 5                                              | 3.1   | 3.95E-04 | 3.61E-02 |
| Ptp4a1    | protein tyrosine phosphatase 4a1                                                | 0.81  | 3.94E-04 | 3.61E-02 |
| Acap1     | ArfGAP with coiled-coil, ankyrinrepeat and PH domains 1                         | 0.86  | 4.00E-04 | 3.61E-02 |
| Hs3st1    | heparan sulfate (glucosamine) 3-O-sulfotransferase 1                            | 1.38  | 4.01E-04 | 3.61E-02 |
| Ifit1     | interferon-induced protein withtetratricopeptide repeats 1                      | 1.06  | 4.01E-04 | 3.61E-02 |
| Bpgm      | 2,3-bisphosphoglycerate mutase                                                  | 1.36  | 4.01E-04 | 3.61E-02 |
| Padi2     | peptidyl arginine deiminase, type II                                            | 2.11  | 4.03E-04 | 3.62E-02 |
| Ptk2b     | PTK2 protein tyrosine kinase 2 beta                                             | -1.51 | 4.07E-04 | 3.63E-02 |
| Dusp26    | dual specificity phosphatase 26 (putative)                                      | 1.09  | 4.11E-04 | 3.66E-02 |
| Map4      | microtubule-associated protein 4                                                | 1.2   | 4.14E-04 | 3.67E-02 |
| Slitrk6   | SLIT and NTRK-like family, member 6                                             | 1.33  | 4.27E-04 | 3.72E-02 |
| Stxbp3    | syntaxin binding protein 3                                                      | 1.25  | 4.29E-04 | 3.72E-02 |
| Il1rap    | interleukin 1 receptor accessory protein                                        | 1.57  | 4.30E-04 | 3.72E-02 |
| Gm10791   | predicted gene 10791                                                            | 1.28  | 4.32E-04 | 3.72E-02 |
| Rgma      | repulsive guidance molecule family member A                                     | 0.85  | 4.43E-04 | 3.76E-02 |
| Spag17    | sperm associated antigen 17                                                     | 1.16  | 4.44E-04 | 3.76E-02 |
| Rab33b    | RAB33B, member RAS oncogene family                                              | 0.92  | 4.44E-04 | 3.76E-02 |
| Bicc1     | BicC family RNA binding protein 1                                               | 1.3   | 4.45E-04 | 3.76E-02 |
| Adi1      | acireductone dioxygenase 1                                                      | 1.14  | 4.46E-04 | 3.76E-02 |
| Myo6      | myosin VI                                                                       | 1     | 4.52E-04 | 3.77E-02 |
| Mia       | melanoma inhibitory activity                                                    | 1.97  | 4.56E-04 | 3.79E-02 |
| Lims2     | LIM and senescent cell antigen like domains 2                                   | 1.01  | 4.55E-04 | 3.79E-02 |
| Dnah11    | dynein, axonemal, heavy chain 11                                                | 1.37  | 4.62E-04 | 3.81E-02 |
| Serpinb1a | serine (or cysteine) peptidase inhibitor, clade B, member 1a                    | 3.08  | 4.72E-04 | 3.84E-02 |
| Cfap61    | cilia and flagella associated protein 61                                        | 1.21  | 4.70E-04 | 3.84E-02 |
| Frmd8     | FERM domain containing 8                                                        | 1.82  | 4.74E-04 | 3.84E-02 |
| Selenbp2  | selenium binding protein 2                                                      | 0.97  | 4.73E-04 | 3.84E-02 |
| Smad7     | SMAD family member 7                                                            | 1.2   | 4.74E-04 | 3.84E-02 |
| Lsm11     | U7 snRNP-specific Sm-like protein LSM11                                         | -0.91 | 4.76E-04 | 3.84E-02 |
| Tgtp1     | T cell specific GTPase 1                                                        | 1.47  | 4.78E-04 | 3.84E-02 |
| Clic4     | chloride intracellular channel 4 (mitochondrial)                                | 1.46  | 4.78E-04 | 3.84E-02 |
| Elf5      | E74-like factor 5                                                               | 1.26  | 4.81E-04 | 3.85E-02 |
| Ift43     | intraflagellar transport 43                                                     | 0.96  | 4.83E-04 | 3.85E-02 |
| Sema6d    | sema domain, transmembrane domain (TM), and cytoplasmic domain, (semaphorin) 6D | 1.17  | 4.85E-04 | 3.86E-02 |

|               |                                                                               |      |          |          |
|---------------|-------------------------------------------------------------------------------|------|----------|----------|
| Wscd1         | WSC domain containing 1                                                       | 1.1  | 4.91E-04 | 3.89E-02 |
| Fermt2        | fermitin family member 2                                                      | 0.92 | 4.99E-04 | 3.91E-02 |
| Kif1c         | kinesin family member 1C                                                      | 1.13 | 4.99E-04 | 3.91E-02 |
| Mbp           | myelin basic protein                                                          | 3.06 | 5.07E-04 | 3.92E-02 |
| Cdhr4         | cadherin-related family member 4                                              | 2.38 | 5.08E-04 | 3.92E-02 |
| Rdx           | radixin                                                                       | 1.44 | 5.04E-04 | 3.92E-02 |
| Plekhg1       | pleckstrin homology domain containing, family G (with RhoGef domain) member 1 | 1.83 | 5.05E-04 | 3.92E-02 |
| 5430414B12Rik | RIKEN cDNA 5430414B12 gene                                                    | 1.25 | 5.05E-04 | 3.92E-02 |
| Fam177a       | family with sequence similarity 177, member A                                 | 0.98 | 5.10E-04 | 3.92E-02 |
| Lzts2         | leucine zipper, putative tumor suppressor 2                                   | 1.23 | 5.14E-04 | 3.94E-02 |
| Enpp2         | ectonucleotide pyrophosphatase/phosphodiesterase2                             | 2.75 | 5.19E-04 | 3.96E-02 |
| Odf3b         | outer dense fiber of sperm tails 3B                                           | 1.79 | 5.28E-04 | 4.02E-02 |
| Acs11         | acyl-CoA synthetase long-chain family member 1                                | 1.12 | 5.33E-04 | 4.04E-02 |
| Nfe2l3        | nuclear factor, erythroid derived 2, like 3                                   | 1.85 | 5.37E-04 | 4.05E-02 |
| Tmem63a       | transmembrane protein 63a                                                     | 2.47 | 5.42E-04 | 4.05E-02 |
| Sec14l4       | SEC14-like lipid binding 4                                                    | 1.21 | 5.39E-04 | 4.05E-02 |
| Scd1          | stearoyl-Coenzyme A desaturase 1                                              | 1.77 | 5.42E-04 | 4.05E-02 |
| 2700046A07Rik | RIKEN cDNA 2700046A07 gene                                                    | 1.73 | 5.47E-04 | 4.06E-02 |
| Rhpn2         | rhophilin, Rho GTPase binding protein 2                                       | 1.35 | 5.48E-04 | 4.06E-02 |
| Cntn2         | contactin 2                                                                   | 2.06 | 5.57E-04 | 4.08E-02 |
| Pacs2         | phosphofurin acidic cluster sorting protein 2                                 | 1.88 | 5.63E-04 | 4.08E-02 |
| Anln          | anillin, actin binding protein                                                | 2.54 | 5.63E-04 | 4.08E-02 |
| Josd2         | Josephin domain containing 2                                                  | 1.5  | 5.62E-04 | 4.08E-02 |
| Cfap157       | cilia and flagella associated protein 157                                     | 1.31 | 5.63E-04 | 4.08E-02 |
| Nkx6-2        | NK6 homeobox 2                                                                | 2.92 | 5.69E-04 | 4.08E-02 |
| Mycbpap       | MYCBP associated protein                                                      | 1.48 | 5.67E-04 | 4.08E-02 |
| Gstt3         | glutathione S-transferase, theta 3                                            | 1.48 | 5.68E-04 | 4.08E-02 |
| Cdc42ep1      | CDC42 effector protein (Rho                                                   | 1.56 | 5.69E-04 | 4.08E-02 |

|               |                                                                              |       |          |          |
|---------------|------------------------------------------------------------------------------|-------|----------|----------|
|               | GTPase binding) 1                                                            |       |          |          |
| Tpm1          | tropomyosin 1, alpha                                                         | 0.99  | 5.71E-04 | 4.09E-02 |
| Camk4         | calcium/calmodulin-dependent protein kinase IV                               | -1.24 | 5.75E-04 | 4.10E-02 |
| Eci1          | enoyl-Coenzyme A delta isomerase 1                                           | 0.81  | 5.77E-04 | 4.11E-02 |
| Tmeff2        | transmembrane protein with EGF- like and two follistatin-like domains 2      | 1.49  | 5.80E-04 | 4.11E-02 |
| I190005I06Rik | RIKEN cDNA I190005I06 gene                                                   | 1.22  | 5.81E-04 | 4.11E-02 |
| Pde1c         | phosphodiesterase 1C                                                         | 0.85  | 5.84E-04 | 4.12E-02 |
| Misp3         | MISP family member 3                                                         | 1.88  | 5.86E-04 | 4.12E-02 |
| Galnt6        | polypeptide N-acetylgalactosaminyltransferase 6                              | 1.63  | 5.88E-04 | 4.12E-02 |
| Efna1         | ephrin A1                                                                    | 0.92  | 5.92E-04 | 4.14E-02 |
| Rdh5          | retinol dehydrogenase 5                                                      | 1.59  | 6.01E-04 | 4.19E-02 |
| Lss           | lanosterol synthase                                                          | 0.93  | 6.03E-04 | 4.19E-02 |
| Bcas1         | breast carcinoma amplified sequence 1                                        | 2.15  | 6.10E-04 | 4.20E-02 |
| Cdr2          | cerebellar degeneration-related 2                                            | 1.42  | 6.08E-04 | 4.20E-02 |
| Foxn3         | forkhead box N3                                                              | 1.38  | 6.09E-04 | 4.20E-02 |
| Shisa4        | shisa family member 4                                                        | 0.99  | 6.15E-04 | 4.22E-02 |
| Ywhaq         | tyrosine 3-monooxygenase/tryptophan 5- monooxygenase activation proteintheta | 0.89  | 6.22E-04 | 4.25E-02 |
| Larp6         | La ribonucleoprotein domain family, member 6                                 | 1.11  | 6.25E-04 | 4.25E-02 |
| I110017D15Rik | RIKEN cDNA I110017D15 gene                                                   | 1.5   | 6.25E-04 | 4.25E-02 |
| Ifit3b        | interferon-induced protein with tetratricopeptide repeats 3B                 | 1.07  | 6.30E-04 | 4.26E-02 |
| Ccdc13        | coiled-coil domain containing 13                                             | 1.66  | 6.31E-04 | 4.26E-02 |
| E130308A19Rik | RIKEN cDNA E130308A19 gene                                                   | 1.15  | 6.32E-04 | 4.26E-02 |
| Mob3b         | MOB kinase activator 3B                                                      | 1.48  | 6.37E-04 | 4.27E-02 |
| Chn2          | chimerin 2                                                                   | 1.24  | 6.37E-04 | 4.27E-02 |
| Cyp51         | cytochrome P450, family 51                                                   | 1.06  | 6.45E-04 | 4.32E-02 |
| I700094D03Rik | RIKEN cDNA I700094D03 gene                                                   | 1.09  | 6.50E-04 | 4.33E-02 |
| Nsdhl         | NAD(P) dependent steroid dehydrogenase-like                                  | 0.93  | 6.57E-04 | 4.33E-02 |
| Dusp16        | dual specificity phosphatase 16                                              | 1.09  | 6.60E-04 | 4.33E-02 |
| Pigz          | phosphatidylinositol glycan anchorbiosynthesis, class Z                      | 2.39  | 6.67E-04 | 4.33E-02 |
| Per2          | period circadian clock 2                                                     | -1.19 | 6.67E-04 | 4.33E-02 |
| Dnaaf1        | dynein, axonemal assembly factor 1                                           | 1.13  | 6.68E-04 | 4.33E-02 |
| Gbp2          | guanylate binding protein 2                                                  | 1.29  | 6.69E-04 | 4.33E-02 |
| Cd82          | CD82 antigen                                                                 | 2.41  | 6.74E-04 | 4.33E-02 |
| Tnfrsf13c     | tumor necrosis factor receptorsuperfamily, member 13c                        | 1.03  | 6.75E-04 | 4.33E-02 |
| Efcab14       | EF-hand calcium binding domain 14                                            | 1.16  | 6.75E-04 | 4.33E-02 |
| Lbr           | lamin B receptor                                                             | 0.87  | 6.76E-04 | 4.33E-02 |

|          |                                                                           |       |          |          |
|----------|---------------------------------------------------------------------------|-------|----------|----------|
| Slc5a11  | solute carrier family 5 (sodium/glucose cotransporter), member 11         | 2.03  | 6.80E-04 | 4.34E-02 |
| Wipi1    | WD repeat domain, phosphoinositide interacting 1                          | 1.19  | 6.82E-04 | 4.34E-02 |
| Cldn34c1 | claudin 34C1                                                              | 1.07  | 6.83E-04 | 4.34E-02 |
| Cyp2j13  | cytochrome P450, family 2,subfamily j, polypeptide 13                     | 0.97  | 6.84E-04 | 4.34E-02 |
| Nmral1   | NmrA-like family domain containing 1                                      | 1.98  | 6.88E-04 | 4.35E-02 |
| Tmem125  | transmembrane protein 125                                                 | 3.39  | 6.98E-04 | 4.35E-02 |
| Ninj2    | ninjurin 2                                                                | 2.21  | 7.02E-04 | 4.35E-02 |
| Gphn     | gephyrin                                                                  | 1.02  | 6.96E-04 | 4.35E-02 |
| Gatm     | glycine amidinotransferase (L-arginine:glycine amidinotransferase)        | 1.9   | 7.04E-04 | 4.35E-02 |
| Cpm      | carboxypeptidase M                                                        | 2.04  | 7.06E-04 | 4.35E-02 |
| Cers2    | ceramide synthase 2                                                       | 2.01  | 7.22E-04 | 4.40E-02 |
| Gbp8     | guanylate-binding protein 8                                               | 0.87  | 7.21E-04 | 4.40E-02 |
| Baiap2   | brain-specific angiogenesis inhibitor 1-associated protein 2              | -1.05 | 7.29E-04 | 4.43E-02 |
| Hepacam  | hepatocyte cell adhesion molecule                                         | 0.79  | 7.36E-04 | 4.43E-02 |
| Clcn5    | chloride channel, voltage-sensitive 5                                     | 0.93  | 7.36E-04 | 4.43E-02 |
| Cdh20    | cadherin 20                                                               | 1.12  | 7.37E-04 | 4.43E-02 |
| Aspa     | aspartoacylase                                                            | 3.21  | 7.40E-04 | 4.44E-02 |
| Gng8     | guanine nucleotide binding protein(G protein), gamma 8                    | 2.5   | 7.43E-04 | 4.44E-02 |
| Slc6a9   | solute carrier family 6 (neurotransmitter transporter, glycine), member 9 | 1.54  | 7.45E-04 | 4.44E-02 |
| Macrodl  | mono-ADP ribosylhydrolase 1                                               | 0.94  | 7.49E-04 | 4.45E-02 |
| Plp1     | proteolipid protein (myelin) 1                                            | 3.38  | 7.71E-04 | 4.50E-02 |
| Ernm     | ermin, ERM-like protein                                                   | 2.48  | 7.75E-04 | 4.50E-02 |
| Zfp474   | zinc finger protein 474                                                   | 1.63  | 7.69E-04 | 4.50E-02 |
| Usp54    | ubiquitin specific peptidase 54                                           | 1.08  | 7.69E-04 | 4.50E-02 |
| Fxyd1    | FXD domain-containing ion transport regulator 1                           | 1.42  | 7.74E-04 | 4.50E-02 |
| Fam161a  | family with sequence similarity 161, member A                             | 1.15  | 7.75E-04 | 4.50E-02 |
| Slc35a2  | solute carrier family 35 (UDP- galactose transporter), member A2          | 0.91  | 7.78E-04 | 4.51E-02 |
| Mog      | myelin oligodendrocyte glycoprotein                                       | 3.27  | 7.82E-04 | 4.52E-02 |
| Rras2    | related RAS viral (r-ras) oncogene 2                                      | 0.74  | 7.86E-04 | 4.54E-02 |
| Olig2    | oligodendrocyte transcription factor 2                                    | 1.45  | 7.93E-04 | 4.56E-02 |
| Prr18    | proline rich 18                                                           | 3.24  | 7.98E-04 | 4.56E-02 |
| Adamts1  | ADAMTS-like 1                                                             | 1.19  | 7.99E-04 | 4.56E-02 |
| Lrrn1    | leucine rich repeat protein 1, neuronal                                   | 1.43  | 8.00E-04 | 4.56E-02 |
| Clip1    | CAP-GLY domain containing                                                 | -0.84 | 8.01E-04 | 4.56E-02 |

|          |                                                                                                             |       |          |          |
|----------|-------------------------------------------------------------------------------------------------------------|-------|----------|----------|
|          | linker protein 1                                                                                            |       |          |          |
| Srd5a1   | steroid 5 alpha-reductase 1                                                                                 | 1.61  | 8.09E-04 | 4.57E-02 |
| Rsad2    | radical S-adenosyl methioninedomain<br>containing 2                                                         | 1.14  | 8.11E-04 | 4.57E-02 |
| Pard3    | par-3 family cell polarity regulator                                                                        | 1     | 8.11E-04 | 4.57E-02 |
| Gm16124  | predicted gene 16124                                                                                        | 0.82  | 8.18E-04 | 4.59E-02 |
| Cerox1   | cytoplasmic endogenous regulatorof oxidative<br>phosphorylation 1                                           | 1.05  | 8.20E-04 | 4.59E-02 |
| Ccdc146  | coiled-coil domain containing 146                                                                           | 1.1   | 8.21E-04 | 4.59E-02 |
| Mpz11    | myelin protein zero-like 1                                                                                  | 0.93  | 8.22E-04 | 4.59E-02 |
| Cyp39a1  | cytochrome P450, family 39,subfamily a,<br>polypeptide 1                                                    | 1.11  | 8.32E-04 | 4.63E-02 |
| Lhx1os   | LIM homeobox 1, opposite strand                                                                             | 1.46  | 8.34E-04 | 4.63E-02 |
| Rcbtb1   | regulator of chromosome condensation<br>(RCC1) and BTB<br>(POZ) domain containing protein 1                 | 1.38  | 8.35E-04 | 4.63E-02 |
| Fbxo7    | F-box protein 7                                                                                             | 1.16  | 8.38E-04 | 4.64E-02 |
| Efnb3    | ephrin B3                                                                                                   | 2.39  | 8.45E-04 | 4.66E-02 |
| Rgs16    | regulator of G-protein signaling 16                                                                         | 0.91  | 8.44E-04 | 4.66E-02 |
| Akap14   | A kinase (PRKA) anchor protein 14                                                                           | 1.39  | 8.50E-04 | 4.67E-02 |
| Ak3      | adenylate kinase 3                                                                                          | 0.73  | 8.54E-04 | 4.69E-02 |
| Add2     | adducin 2 (beta)                                                                                            | -0.91 | 8.69E-04 | 4.75E-02 |
| Litaf    | LPS-induced TN factor                                                                                       | 1.86  | 8.76E-04 | 4.76E-02 |
| H2-Aa    | histocompatibility 2, class II<br>antigen A, alpha                                                          | 1.22  | 8.76E-04 | 4.76E-02 |
| Spata24  | spermatogenesis associated 24                                                                               | 1.05  | 8.77E-04 | 4.76E-02 |
| BC034090 | cDNA sequence BC034090                                                                                      | 1.19  | 8.79E-04 | 4.76E-02 |
| Kazn     | kazrin, periplakin interacting<br>protein                                                                   | 1.24  | 8.85E-04 | 4.78E-02 |
| Fam107b  | family with sequence similarity<br>107, member B                                                            | 1.2   | 8.86E-04 | 4.78E-02 |
| Cd74     | CD74 antigen (invariant polypeptide of major<br>histocompatibility complex, class IIantigen-<br>associated) | 1.24  | 8.92E-04 | 4.78E-02 |
| Tmprss5  | transmembrane protease, serine 5<br>(spinesin)                                                              | 2.14  | 9.02E-04 | 4.80E-02 |
| Endod1   | endonuclease domain containing 1                                                                            | 1.07  | 8.97E-04 | 4.80E-02 |
| Mtmr10   | myotubularin related protein 10                                                                             | 1.03  | 9.02E-04 | 4.80E-02 |
| Piga     | phosphatidylinositol glycan anchorbiosynthesis,<br>class A                                                  | 1.52  | 9.03E-04 | 4.80E-02 |
| Lyst     | lysosomal trafficking regulator                                                                             | -0.88 | 9.14E-04 | 4.85E-02 |
| Lap3     | leucine aminopeptidase 3                                                                                    | 1.05  | 9.18E-04 | 4.85E-02 |
| Lrrfip1  | leucine rich repeat (in FLII)<br>interacting protein 1                                                      | -0.94 | 9.18E-04 | 4.85E-02 |
| Abhd5    | abhydrolase domain containing 5                                                                             | 0.86  | 9.21E-04 | 4.85E-02 |
| Rassf8   | Ras association (RalGDS/AF-6)domain family<br>(N-terminal) member 8                                         | 0.99  | 9.24E-04 | 4.86E-02 |
| Casq2    | calsequestrin 2                                                                                             | 0.9   | 9.28E-04 | 4.86E-02 |

|               |                                                                                               |       |          |          |
|---------------|-----------------------------------------------------------------------------------------------|-------|----------|----------|
| Ppp2r3a       | protein phosphatase 2, regulatory subunit B",<br>alpha                                        | 1.06  | 9.30E-04 | 4.86E-02 |
| 2010001K21Rik | RIKEN cDNA 2010001K21 gene                                                                    | 1.31  | 9.34E-04 | 4.86E-02 |
| Cfap70        | cilia and flagella associated protein<br>70                                                   | 1.26  | 9.35E-04 | 4.86E-02 |
| Traip         | TRAF-interacting protein                                                                      | -1.31 | 9.39E-04 | 4.86E-02 |
| Lrguk         | leucine-rich repeats and guanylatekinase domain<br>containing                                 | 0.92  | 9.40E-04 | 4.86E-02 |
| Sntb2         | syntrophin, basic 2                                                                           | -1.14 | 9.54E-04 | 4.92E-02 |
| Card19        | caspase recruitment domain family, member 19                                                  | 1.28  | 9.58E-04 | 4.92E-02 |
| Slc34a3       | solute carrier family 34 (sodium phosphate),<br>member 3                                      | 2.15  | 9.61E-04 | 4.93E-02 |
| Slc17a6       | solute carrier family 17 (sodium-dependent<br>inorganic phosphate<br>cotransporter), member 6 | 1.22  | 9.67E-04 | 4.93E-02 |
| Rarres2       | retinoic acid receptor responder (tazarotene<br>induced) 2                                    | 1.84  | 9.75E-04 | 4.93E-02 |
| Mal           | myelin and lymphocyte protein, T cell<br>differentiation protein                              | 3.67  | 9.75E-04 | 4.93E-02 |
| Tjp3          | tight junction protein 3                                                                      | 1.26  | 9.70E-04 | 4.93E-02 |
| Gkap1         | G kinase anchoring protein 1                                                                  | 0.83  | 9.76E-04 | 4.93E-02 |
| Pkp4          | plakophilin 4                                                                                 | 1.3   | 9.78E-04 | 4.93E-02 |
| Slit3         | slit guidance ligand 3                                                                        | -1.57 | 9.85E-04 | 4.96E-02 |
| St3gal4       | ST3 beta-galactoside alpha-2,3-<br>sialyltransferase 4                                        | 1     | 9.91E-04 | 4.97E-02 |

**Table S12.** Differentially expressed genes in *corpus callosum* from mice which underwent remyelination compared to mice treated with cuprizone for 4 weeks.

| Symbol        | Gene Name                                                                          | Log2<br>fold<br>change | p-value  | Adjusted<br>p-value |
|---------------|------------------------------------------------------------------------------------|------------------------|----------|---------------------|
| Ninj2         | ninjurin 2                                                                         | 1.86                   | 6.35E-07 | 4.60E-03            |
| Mog           | myelin oligodendrocyte<br>glycoprotein                                             | 3.13                   | 7.39E-07 | 4.60E-03            |
| Cyp3a13       | cytochrome P450, family<br>3, subfamily a, polypeptide<br>13                       | 1.34                   | 7.49E-07 | 4.60E-03            |
| Trib3         | tribbles pseudokinase 3                                                            | -3.16                  | 7.56E-07 | 4.60E-03            |
| Gm5067        | ribosome biogenesis regulatory<br>protein homolog                                  | 2.93                   | 1.52E-06 | 7.10E-03            |
| Sh3gl3        | SH3-domain GRB2-like 3                                                             | 1.87                   | 2.47E-06 | 7.10E-03            |
| Msmo1         | methylsterol monooxygenase 1                                                       | 1.47                   | 2.58E-06 | 7.10E-03            |
| E330037M01Rik | RIKEN cDNA E330037M01 gene                                                         | 3.05                   | 2.84E-06 | 7.10E-03            |
| Plekhh1       | pleckstrin homology domain<br>containing, family H (with<br>MyTH4 domain) member 1 | 2.28                   | 2.93E-06 | 7.10E-03            |
| Insig1        | insulin induced gene 1                                                             | 1.39                   | 3.13E-06 | 7.10E-03            |
| Col11a2       | collagen, type XI, alpha 2                                                         | 1.42                   | 3.21E-06 | 7.10E-03            |
| Ccp110        | centriolar coiled coil protein 110                                                 | 1.52                   | 3.73E-06 | 7.58E-03            |
| B230206H07Rik | RIKEN cDNA B230206H07 gene                                                         | 1.6                    | 4.85E-06 | 8.28E-03            |

|           |                                                                                       |       |          |          |
|-----------|---------------------------------------------------------------------------------------|-------|----------|----------|
| Speer4cos | spermatogenesis associated glutamate (E)-rich protein 4C, opposite strand transcript  | 2.03  | 5.67E-06 | 8.28E-03 |
| Nupr1     | nuclear protein transcription regulator 1                                             | -2.91 | 6.28E-06 | 8.28E-03 |
| Mal       | myelin and lymphocyte protein, Tcell differentiation protein                          | 3.82  | 7.10E-06 | 8.28E-03 |
| Sgk2      | serum/glucocorticoid regulated kinase 2                                               | 3.07  | 7.23E-06 | 8.28E-03 |
| Piga      | phosphatidylinositol glycan anchorbiosynthesis, class A                               | 1.48  | 7.31E-06 | 8.28E-03 |
| Fa2h      | fatty acid 2-hydroxylase                                                              | 3.3   | 7.94E-06 | 8.28E-03 |
| Zdhhc9    | zinc finger, DHHC domain containing 9                                                 | 1.35  | 8.24E-06 | 8.28E-03 |
| Ano4      | anoctamin 4                                                                           | 0.98  | 8.30E-06 | 8.28E-03 |
| Carns1    | carnosine synthase 1                                                                  | 1.42  | 8.46E-06 | 8.28E-03 |
| Anln      | anillin, actin binding protein                                                        | 2.54  | 8.58E-06 | 8.28E-03 |
| Plekhg3   | pleckstrin homology domain containing, family G (with RhoGef domain) member 3         | 2.37  | 8.70E-06 | 8.28E-03 |
| Nipal4    | NIPA-like domain containing 4                                                         | 0.74  | 9.31E-06 | 8.28E-03 |
| Serpind1  | serine (or cysteine) peptidaseinhibitor, clade D, member 1                            | 1.96  | 1.01E-05 | 8.28E-03 |
| Adamtsl4  | ADAMTS-like 4                                                                         | 1.08  | 1.02E-05 | 8.28E-03 |
| Jam3      | junction adhesion molecule 3                                                          | 1.48  | 1.05E-05 | 8.28E-03 |
| Elov11    | elongation of very long chain fatty acids (FEN1/Elo2, SUR4/Elo3, yeast)-like 1        | 1.4   | 1.10E-05 | 8.28E-03 |
| Sspo      | SCO-spondin                                                                           | 1.25  | 1.13E-05 | 8.28E-03 |
| Slc6a9    | solute carrier family 6 (neurotransmitter transporter, glycine), member 9             | 1.53  | 1.13E-05 | 8.28E-03 |
| Plekhg3   | pleckstrin homology domain containing, family G (with RhoGef domain) member 3         | 1.71  | 1.24E-05 | 8.28E-03 |
| Tex52     | testis expressed 52                                                                   | 1.16  | 1.26E-05 | 8.28E-03 |
| Phldb1    | pleckstrin homology like domain, family B, member 1                                   | 2.37  | 1.27E-05 | 8.28E-03 |
| Cpox      | coproporphyrinogen oxidase                                                            | 1.31  | 1.32E-05 | 8.28E-03 |
| Eif4ebp1  | eukaryotic translation initiationfactor 4E binding protein 1                          | -1.67 | 1.33E-05 | 8.28E-03 |
| Septin4   | septin 4                                                                              | 2.41  | 1.41E-05 | 8.48E-03 |
| Ptprd     | protein tyrosine phosphatase, receptor type, D                                        | 1.37  | 1.44E-05 | 8.48E-03 |
| Dock5     | dedicator of cytokinesis 5                                                            | 1.99  | 1.46E-05 | 8.48E-03 |
| Aspa      | aspartoacylase                                                                        | 2.28  | 1.54E-05 | 8.70E-03 |
| ErbB3     | erb-b2 receptor tyrosine kinase 3                                                     | 0.89  | 1.66E-05 | 8.76E-03 |
| Aatk      | apoptosis-associated tyrosine kinase                                                  | 1.34  | 1.74E-05 | 9.01E-03 |
| Gstp1     | glutathione S-transferase, pi 1                                                       | 0.98  | 1.92E-05 | 9.32E-03 |
| Sox8      | SRY (sex determining region Y)-box 8                                                  | 1.54  | 1.94E-05 | 9.32E-03 |
| Rffl      | ring finger and FYVE like domaincontaining protein                                    | 1.32  | 1.95E-05 | 9.32E-03 |
| Map7      | microtubule-associated protein 7                                                      | 1.39  | 2.06E-05 | 9.58E-03 |
| Plxnb3    | plexin B3                                                                             | 2.4   | 2.09E-05 | 9.58E-03 |
| Rcbtb1    | regulator of chromosome condensation (RCC1) and BTB (POZ) domain containing protein 1 | 1.46  | 2.26E-05 | 1.02E-02 |
| Plaat3    | phospholipase A and acyltransferase 3                                                 | 2.17  | 2.37E-05 | 1.05E-02 |
| Trp53inp2 | transformation related protein 53inducible nuclear protein 2                          | 1.19  | 2.40E-05 | 1.05E-02 |
| Il17rb    | interleukin 17 receptor B                                                             | 1.25  | 2.49E-05 | 1.05E-02 |
| Figf      | fidgetin                                                                              | 1.42  | 2.49E-05 | 1.05E-02 |
| Opalin    | oligodendrocytic myelin paranodaland inner loop protein                               | 1.3   | 2.58E-05 | 1.06E-02 |
| Josd2     | Josephin domain containing 2                                                          | 1.3   | 2.61E-05 | 1.06E-02 |
| Ugt8a     | UDP galactosyltransferase 8A                                                          | 2.79  | 2.85E-05 | 1.14E-02 |
| Pacs2     | phosphofurin acidic cluster sorting protein 2                                         | 1.93  | 2.98E-05 | 1.17E-02 |

|               |                                                                                               |       |          |          |
|---------------|-----------------------------------------------------------------------------------------------|-------|----------|----------|
| Adamts4       | a disintegrin-like and metallopeptidase (reprolysin type) with thrombospondin type 1 motif,4  | 1.81  | 3.20E-05 | 1.24E-02 |
| A730008I21Rik | RIKEN cDNA A730008I21 gene                                                                    | 0.83  | 3.30E-05 | 1.25E-02 |
| Slc34a3       | solute carrier family 34 (sodium phosphate), member 3                                         | 1.6   | 3.47E-05 | 1.28E-02 |
| Tprn          | taperin                                                                                       | 1.9   | 3.68E-05 | 1.32E-02 |
| Atf5          | activating transcription factor 5                                                             | -2.34 | 3.88E-05 | 1.37E-02 |
| Car14         | carbonic anhydrase 14                                                                         | 2.1   | 4.13E-05 | 1.43E-02 |
| Cntn2         | contactin 2                                                                                   | 1.82  | 4.17E-05 | 1.43E-02 |
| Tmeff2        | transmembrane protein with EGF-like and two follistatin-like domains 2                        | 1.26  | 4.23E-05 | 1.43E-02 |
| Galnt6        | polypeptide N-acetylgalactosaminyltransferase 6                                               | 1.2   | 4.53E-05 | 1.50E-02 |
| Enpp4         | ectonucleotide pyrophosphatase/phosphodiesterase4                                             | 1.33  | 4.75E-05 | 1.50E-02 |
| Desi1         | desumoylating isopeptidase 1                                                                  | 1.5   | 4.82E-05 | 1.50E-02 |
| Slc5a11       | solute carrier family 5 (sodium/glucose cotransporter), member 11                             | 1.54  | 4.87E-05 | 1.50E-02 |
| Rasl12        | RAS-like, family 12                                                                           | 0.95  | 5.04E-05 | 1.50E-02 |
| Enpp6         | ectonucleotide pyrophosphatase/phosphodiesterase6                                             | 1.13  | 5.06E-05 | 1.50E-02 |
| Speer4b       | spermatogenesis associated glutamate (E)-rich protein 4B                                      | 0.7   | 5.11E-05 | 1.50E-02 |
| Gnb4          | guanine nucleotide binding protein(G protein), beta 4                                         | 0.81  | 5.12E-05 | 1.50E-02 |
| Cacna2d4      | calcium channel, voltage- dependent, alpha 2/delta subunit 4                                  | 1.75  | 5.16E-05 | 1.50E-02 |
| Smad7         | SMAD family member 7                                                                          | 1.32  | 5.24E-05 | 1.50E-02 |
| Cers2         | ceramide synthase 2                                                                           | 2     | 5.25E-05 | 1.50E-02 |
| Cpm           | carboxypeptidase M                                                                            | 1.94  | 5.25E-05 | 1.50E-02 |
| Sox10         | SR Y (sex determining region Y)-box 10                                                        | 1.6   | 5.40E-05 | 1.50E-02 |
| Dync1li2      | dynein, cytoplasmic 1 light intermediate chain 2                                              | 0.84  | 5.44E-05 | 1.50E-02 |
| Dnajb2        | DnaJ heat shock protein family (Hsp40) member B2                                              | 1.5   | 5.58E-05 | 1.51E-02 |
| Foxn3         | forkhead box N3                                                                               | 1.31  | 5.60E-05 | 1.51E-02 |
| Fnbp1         | formin binding protein 1                                                                      | 1.33  | 5.64E-05 | 1.51E-02 |
| Trpv3         | transient receptor potential cation channel, subfamily V, member 3                            | 0.68  | 5.77E-05 | 1.51E-02 |
| Il12rb1       | interleukin 12 receptor, beta 1                                                               | 1.92  | 5.81E-05 | 1.51E-02 |
| Srd5a1        | steroid 5 alpha-reductase 1                                                                   | 1.5   | 5.95E-05 | 1.51E-02 |
| Ldlr          | low density lipoprotein receptor                                                              | 1.77  | 5.95E-05 | 1.51E-02 |
| Elovl7        | ELOVL family member 7, elongation of long chain fatty acids (yeast)                           | 1.94  | 5.96E-05 | 1.51E-02 |
| Mboat1        | membrane bound O-acyltransferase domain containing 1                                          | 2.1   | 6.29E-05 | 1.55E-02 |
| Rnf13         | ring finger protein 13                                                                        | 0.9   | 6.43E-05 | 1.56E-02 |
| Rftn1         | raftlin lipid raft linker 1                                                                   | 1.42  | 6.57E-05 | 1.56E-02 |
| Pde4b         | phosphodiesterase 4B, cAMP specific                                                           | 1.48  | 6.62E-05 | 1.56E-02 |
| Otd7b         | OTU domain containing 7B                                                                      | 1.43  | 6.63E-05 | 1.56E-02 |
| Agpat4        | 1-acylglycerol-3-phosphate O-acyltransferase 4 (lysophosphatidic acid acyltransferase, delta) | 1.08  | 6.73E-05 | 1.56E-02 |
| Fndc11        | fibronectin type III domain containing 11                                                     | 1.27  | 6.80E-05 | 1.56E-02 |
| Frmd8         | FERM domain containing 8                                                                      | 1.74  | 6.80E-05 | 1.56E-02 |
| Kndc1         | kinase non-catalytic C-lobe domain (KIND) containing 1                                        | 1.45  | 7.19E-05 | 1.62E-02 |
| Gm4221        | predicted gene 4221                                                                           | 0.94  | 7.20E-05 | 1.62E-02 |
| Micall1       | microtubule associated monooxygenase,                                                         | 2.08  | 7.25E-05 | 1.62E-02 |

|                |                                                                       |       |          |          |
|----------------|-----------------------------------------------------------------------|-------|----------|----------|
|                | calponin and LIM domain containing -like 1                            |       |          |          |
| Cdc42ep2       | CDC42 effector protein (Rho GTPase binding) 2                         | 1.88  | 7.42E-05 | 1.64E-02 |
| Mobp           | myelin-associated oligodendrocytic basic protein                      | 3.24  | 7.66E-05 | 1.65E-02 |
| Mcarn          | melanoma cell adhesion molecule                                       | 0.75  | 7.85E-05 | 1.65E-02 |
| Nsdhl          | NAD(P) dependent steroid dehydrogenase-like                           | 1.16  | 7.92E-05 | 1.65E-02 |
| Mobp           | myelin-associated oligodendrocytic basic protein                      | 3.7   | 7.95E-05 | 1.65E-02 |
| Dhcr7          | 7-dehydrocholesterol reductase                                        | 1.1   | 8.02E-05 | 1.65E-02 |
| 5031439G07Rik  | RIKEN cDNA 5031439G07 gene                                            | 1.45  | 8.03E-05 | 1.65E-02 |
| Edil3          | EGF-like repeats and discoidin I-like domains 3                       | 0.81  | 8.05E-05 | 1.65E-02 |
| Mcarn          | melanoma cell adhesion molecule                                       | 2.17  | 8.15E-05 | 1.65E-02 |
| Ralgds         | ral guanine nucleotide dissociation stimulator                        | 1.04  | 8.31E-05 | 1.65E-02 |
| Daam1          | dishevelled associated activator of morphogenesis 1                   | 1     | 8.31E-05 | 1.65E-02 |
| Rhog           | ras homolog family member G                                           | 1.69  | 8.40E-05 | 1.65E-02 |
| Nfasc          | neurofascin                                                           | 1.35  | 8.42E-05 | 1.65E-02 |
| Tjp2           | tight junction protein 2                                              | 1.11  | 8.50E-05 | 1.65E-02 |
| Hapln2         | hyaluronan and proteoglycan link protein 2                            | 2.3   | 8.52E-05 | 1.65E-02 |
| Lpar1          | lysophosphatidic acid receptor 1                                      | 2.44  | 8.68E-05 | 1.65E-02 |
| Nat8           | N-acetyltransferase 8 (GCN5-related)                                  | -0.92 | 8.74E-05 | 1.65E-02 |
| D16Erd472e     | DNA segment, Chr 16, ERATO Doi 472, expressed                         | 1.73  | 8.90E-05 | 1.65E-02 |
| Tmprss5        | transmembrane protease, serine 5 (spinesin)                           | 1.66  | 8.91E-05 | 1.65E-02 |
| Zfp536         | zinc finger protein 536                                               | 1.54  | 9.02E-05 | 1.65E-02 |
| Pde1c          | phosphodiesterase 1C                                                  | 0.72  | 9.06E-05 | 1.65E-02 |
| Usp54          | ubiquitin specific peptidase 54                                       | 1.55  | 9.07E-05 | 1.65E-02 |
| Tlcd3a         | TLC domain containing 3A                                              | 0.9   | 9.10E-05 | 1.65E-02 |
| Myo1d          | myosin ID                                                             | 1.16  | 9.11E-05 | 1.65E-02 |
| Gipr           | gastric inhibitory polypeptide receptor                               | 0.85  | 9.22E-05 | 1.65E-02 |
| Nod1           | nucleotide-binding oligomerization domain containing 1                | 1.3   | 9.33E-05 | 1.65E-02 |
| Speer8-ps1     | spermatogenesis associated glutamate (E)-rich protein 8, pseudogene 1 | 0.79  | 9.38E-05 | 1.65E-02 |
| Nkain2         | Na <sup>+</sup> /K <sup>+</sup> transporting ATPase interacting 2     | 0.88  | 9.42E-05 | 1.65E-02 |
| Pcyt2          | phosphate cytidylyltransferase 2, ethanolamine                        | 0.98  | 9.49E-05 | 1.65E-02 |
| Arhgef10       | Rho guanine nucleotide exchange factor (GEF) 10                       | 1.37  | 9.55E-05 | 1.65E-02 |
| Padi2          | peptidyl arginine deiminase, type II                                  | 2.03  | 9.66E-05 | 1.66E-02 |
| Bin1           | bridging integrator 1                                                 | 0.84  | 1.01E-04 | 1.69E-02 |
| Secisbp2l      | SECIS binding protein 2-like                                          | 0.98  | 1.01E-04 | 1.69E-02 |
| Pls1           | plastin 1 (I-isoform)                                                 | 2.03  | 1.02E-04 | 1.69E-02 |
| Tafa1          | TAF <sub>A</sub> chemokine like family member 1                       | -0.99 | 1.04E-04 | 1.71E-02 |
| Tspan2         | tetraspanin 2                                                         | 2.8   | 1.05E-04 | 1.71E-02 |
| Nipa1          | non imprinted in Prader-Willi/Angelman syndrome 1 homolog (human)     | 1.04  | 1.06E-04 | 1.71E-02 |
| A1300008O04Rik | RIKEN cDNA A1300008O04 gene                                           | 1.83  | 1.07E-04 | 1.71E-02 |
| Fasn           | fatty acid synthase                                                   | 0.66  | 1.08E-04 | 1.71E-02 |
| ErbB1          | ErbB2 interacting protein                                             | 1.49  | 1.11E-04 | 1.74E-02 |
| Stard9         | START domain containing 9                                             | 0.75  | 1.11E-04 | 1.74E-02 |
| Dusp26         | dual specificity phosphatase 26 (putative)                            | 0.93  | 1.11E-04 | 1.74E-02 |
| NmrA1          | NmrA-like family domain                                               | 2.08  | 1.15E-04 | 1.78E-02 |

|               |                                                               |      |          |          |
|---------------|---------------------------------------------------------------|------|----------|----------|
|               | containing 1                                                  |      |          |          |
| Cmtm5         | CKLF-like MARVEL transmembrane domain containing5             | 1.83 | 1.19E-04 | 1.82E-02 |
| Lctl          | lactase-like                                                  | 0.73 | 1.20E-04 | 1.83E-02 |
| Nxph4         | neurexophilin 4                                               | 0.97 | 1.23E-04 | 1.87E-02 |
| Pde8a         | phosphodiesterase 8A                                          | 1.89 | 1.26E-04 | 1.88E-02 |
| Ppfibp2       | PTPRF interacting protein, bindingprotein 2 (liprin beta 2)   | 1.55 | 1.26E-04 | 1.88E-02 |
| Cyp51         | cytochrome P450, family 51                                    | 1.02 | 1.29E-04 | 1.90E-02 |
| Cdk18         | cyclin-dependent kinase 18                                    | 1.33 | 1.30E-04 | 1.90E-02 |
| Adssl1        | adenylosuccinate synthetase like 1                            | 1.45 | 1.35E-04 | 1.92E-02 |
| Prr5l         | proline rich 5 like                                           | 2.59 | 1.36E-04 | 1.92E-02 |
| Gm9895        | predicted gene 9895                                           | 2.05 | 1.36E-04 | 1.92E-02 |
| 4930506C21Rik | RIKEN cDNA 4930506C21 gene                                    | 0.91 | 1.38E-04 | 1.92E-02 |
| Arhgap23      | Rho GTPase activating protein 23                              | 1.53 | 1.38E-04 | 1.92E-02 |
| Pkp4          | plakophilin 4                                                 | 1.29 | 1.38E-04 | 1.92E-02 |
| Marchf8       | membrane associated ring-CH-type finger 8                     | 1.21 | 1.39E-04 | 1.92E-02 |
| Hmgcs1        | 3-hydroxy-3-methylglutaryl-Coenzyme A synthase 1              | 1.19 | 1.39E-04 | 1.92E-02 |
| Sc5d          | sterol-C5-desaturase                                          | 0.77 | 1.40E-04 | 1.92E-02 |
| Emilin2       | elastin microfibril interfacer 2                              | 1.61 | 1.41E-04 | 1.92E-02 |
| Sqle          | squalene epoxidase                                            | 1.07 | 1.43E-04 | 1.95E-02 |
| Rtkn          | rhoteikin                                                     | 1    | 1.45E-04 | 1.97E-02 |
| Cercam        | cerebral endothelial cell adhesion molecule                   | 0.66 | 1.49E-04 | 1.99E-02 |
| Itgb4         | integrin beta 4                                               | 2.84 | 1.50E-04 | 1.99E-02 |
| Gab1          | growth factor receptor boundprotein 2-associated protein 1    | 1.12 | 1.51E-04 | 1.99E-02 |
| Wnt3          | wingless-type MMTV integrationsite family, member 3           | 1.79 | 1.54E-04 | 2.00E-02 |
| Abca2         | ATP-binding cassette, sub-familyA (ABC1), member 2            | 1.67 | 1.57E-04 | 2.03E-02 |
| Rap1a         | RAS-related protein 1a                                        | 1.01 | 1.62E-04 | 2.08E-02 |
| Chst3         | carbohydrate sulfotransferase 3                               | 1.29 | 1.64E-04 | 2.09E-02 |
| Fgfr2         | fibroblast growth factor receptor 2                           | 1.38 | 1.67E-04 | 2.12E-02 |
| Srpk3         | serine/arginine-rich protein specific kinase 3                | 1.89 | 1.71E-04 | 2.14E-02 |
| 4930402H24Rik | RIKEN cDNA 4930402H24 gene                                    | 0.92 | 1.72E-04 | 2.14E-02 |
| Tppp          | tubulin polymerization promoting protein                      | 0.77 | 1.74E-04 | 2.14E-02 |
| Rasgrp3       | RAS, guanyl releasing protein 3                               | 1.14 | 1.74E-04 | 2.14E-02 |
| Dbnnd2        | dysbindin (dystrobrevin bindingprotein 1) domain containing 2 | 1.5  | 1.75E-04 | 2.14E-02 |
| Taldo1        | transaldolase 1                                               | 0.99 | 1.75E-04 | 2.14E-02 |
| Dixdc1        | DIX domain containing 1                                       | 1.15 | 1.76E-04 | 2.14E-02 |
| Kazn          | kazrin, periplakin interacting protein                        | 1.09 | 1.79E-04 | 2.16E-02 |
| Epn2          | epsin 2                                                       | 0.71 | 1.80E-04 | 2.16E-02 |

|               |                                                                                              |       |          |          |
|---------------|----------------------------------------------------------------------------------------------|-------|----------|----------|
| Spink8        | serine peptidase inhibitor, Kazal type 8                                                     | -1.9  | 1.80E-04 | 2.16E-02 |
| Chac1         | ChaC, cation transport regulator 1                                                           | -1.43 | 1.81E-04 | 2.16E-02 |
| Cldn11        | claudin 11                                                                                   | 2.89  | 1.82E-04 | 2.16E-02 |
| Scd2          | stearoyl-Coenzyme A desaturase 2                                                             | 1.12  | 1.84E-04 | 2.17E-02 |
| Fhdc1         | FH2 domain containing 1                                                                      | 1.15  | 1.86E-04 | 2.19E-02 |
| Slc26a11      | solute carrier family 26, member 11                                                          | 1.03  | 1.87E-04 | 2.19E-02 |
| Sort1         | sortilin 1                                                                                   | 1.04  | 1.90E-04 | 2.20E-02 |
| Bace1         | beta-site APP cleaving enzyme 1                                                              | 0.75  | 1.91E-04 | 2.20E-02 |
| Tmem189       | transmembrane protein 189                                                                    | 0.91  | 1.91E-04 | 2.20E-02 |
| Slc7a5        | solute carrier family 7 (cationic amino acid transporter, y+ system), member 5               | -1.31 | 1.92E-04 | 2.20E-02 |
| Ramp2         | receptor (calcitonin) activity modifying protein 2                                           | -0.72 | 1.94E-04 | 2.22E-02 |
| Car2          | carbonic anhydrase 2                                                                         | 2.1   | 1.99E-04 | 2.27E-02 |
| Ypel2         | yippee like 2                                                                                | 0.8   | 2.02E-04 | 2.29E-02 |
| Atp1b3        | ATPase, Na+/K+ transporting, beta 3 polypeptide                                              | 0.88  | 2.05E-04 | 2.31E-02 |
| Gkap1         | G kinase anchoring protein 1                                                                 | 0.84  | 2.07E-04 | 2.31E-02 |
| 2810410L24Rik | RIKEN cDNA 2810410L24 gene                                                                   | 0.69  | 2.08E-04 | 2.31E-02 |
| Tmem63a       | transmembrane protein 63a                                                                    | 2.45  | 2.08E-04 | 2.31E-02 |
| Litaf         | LPS-induced TN factor                                                                        | 1.74  | 2.16E-04 | 2.39E-02 |
| Rhou          | ras homolog family member U                                                                  | 1.39  | 2.16E-04 | 2.39E-02 |
| Gdf15         | growth differentiation factor 15                                                             | -2.19 | 2.22E-04 | 2.43E-02 |
| Plp1          | proteolipid protein (myelin) 1                                                               | 3.36  | 2.24E-04 | 2.43E-02 |
| Rhobtb3       | Rho-related BTB domain containing 3                                                          | 1     | 2.26E-04 | 2.44E-02 |
| Rtkn2         | rhotekin 2                                                                                   | 1.6   | 2.28E-04 | 2.45E-02 |
| Cdc37l1       | cell division cycle 37-like 1                                                                | 1.25  | 2.31E-04 | 2.47E-02 |
| Gpr62         | G protein-coupled receptor 62                                                                | 2.49  | 2.32E-04 | 2.47E-02 |
| Adamts2       | a disintegrin-like and metallopeptidase (reprolysin type) with thrombospondin type 1 motif,2 | 0.89  | 2.39E-04 | 2.53E-02 |
| Dhcr24        | 24-dehydrocholesterol reductase                                                              | 1.14  | 2.48E-04 | 2.60E-02 |
| Gss           | glutathione synthetase                                                                       | 1.11  | 2.50E-04 | 2.61E-02 |
| S1pr5         | sphingosine-1-phosphate receptor 5                                                           | 2.68  | 2.51E-04 | 2.61E-02 |
| Shtn1         | shootin 1                                                                                    | 1.65  | 2.56E-04 | 2.65E-02 |
| Fam83d        | family with sequence similarity 83, member D                                                 | 0.81  | 2.58E-04 | 2.67E-02 |
| Wrap53        | WD repeat containing, antisense to Trp53                                                     | 0.76  | 2.69E-04 | 2.77E-02 |
| Sptbn1        | spectrin beta, non-erythrocytic 1                                                            | 1.56  | 2.75E-04 | 2.79E-02 |
| Pigz          | phosphatidylinositol glycan anchor biosynthesis, class Z                                     | 2.25  | 2.76E-04 | 2.79E-02 |
| Lss           | lanosterol synthase                                                                          | 0.82  | 2.78E-04 | 2.79E-02 |
| Wipi1         | WD repeat domain, phosphoinositide interacting 1                                             | 1.03  | 2.79E-04 | 2.79E-02 |

|               |                                                                                                             |       |          |          |
|---------------|-------------------------------------------------------------------------------------------------------------|-------|----------|----------|
| Xrcc3         | X-ray repair complementing defective repair in Chinese hamster cells 3                                      | 1.67  | 2.80E-04 | 2.79E-02 |
| Jakmip3       | janus kinase and microtubule interacting protein 3                                                          | 0.95  | 2.84E-04 | 2.80E-02 |
| Limch1        | LIM and calponin homology domains 1                                                                         | 0.79  | 2.85E-04 | 2.80E-02 |
| Olig1         | oligodendrocyte transcription factor 1                                                                      | 1.69  | 2.85E-04 | 2.80E-02 |
| Speer4a       | spermatogenesis associated glutamate (E)-rich protein 4A                                                    | 0.56  | 2.87E-04 | 2.80E-02 |
| Gpt           | glutamic pyruvic transaminase, soluble                                                                      | 1.14  | 2.89E-04 | 2.80E-02 |
| Chd7          | chromodomain helicase DNA binding protein 7                                                                 | 1.07  | 2.89E-04 | 2.80E-02 |
| 5033421B08Rik | RIKEN cDNA 5033421B08 gene                                                                                  | 0.62  | 2.92E-04 | 2.80E-02 |
| Mbnl2         | muscleblind like splicing factor 2                                                                          | 0.97  | 2.92E-04 | 2.80E-02 |
| Gm35438       | predicted gene, 35438                                                                                       | 0.66  | 2.92E-04 | 2.80E-02 |
| Ptpfrf        | protein tyrosine phosphatase, receptor type, F                                                              | 1.03  | 2.96E-04 | 2.80E-02 |
| Mxd4          | Max dimerization protein 4                                                                                  | 1.29  | 2.99E-04 | 2.80E-02 |
| Stxbp3        | syntaxin binding protein 3                                                                                  | 1.33  | 2.99E-04 | 2.80E-02 |
| Hhip          | Hedgehog-interacting protein                                                                                | 1.37  | 2.99E-04 | 2.80E-02 |
| Hipk2         | homeodomain interacting protein kinase 2                                                                    | 0.91  | 3.01E-04 | 2.80E-02 |
| Creb5         | cAMP responsive element bindingprotein 5                                                                    | 1.34  | 3.02E-04 | 2.80E-02 |
| Kcnj16        | potassium inwardly-rectifying channel, subfamily J, member 16                                               | -0.84 | 3.06E-04 | 2.82E-02 |
| St6galnac3    | ST6 (alpha-N-acetyl-neuraminy-2,3-beta-galactosyl-1,3)-N-acetylglactosaminide alpha-2,6-sialyltransferase 3 | 1.01  | 3.08E-04 | 2.83E-02 |
| Gamt          | guanidinoacetate methyltransferase                                                                          | 2.17  | 3.11E-04 | 2.84E-02 |
| Cilk1         | ciliogenesis associated kinase 1                                                                            | 0.94  | 3.16E-04 | 2.87E-02 |
| Cilk1         | ciliogenesis associated kinase 1                                                                            | 1.31  | 3.18E-04 | 2.87E-02 |
| 2700046A07Rik | RIKEN cDNA 2700046A07 gene                                                                                  | 1.49  | 3.21E-04 | 2.87E-02 |
| Plekhh1       | pleckstrin homology domain containing, family B (evectins) member 1                                         | 2.27  | 3.22E-04 | 2.87E-02 |
| Lrig3         | leucine-rich repeats and immunoglobulin-like domains 3                                                      | 1.36  | 3.26E-04 | 2.88E-02 |
| Tmeff1        | transmembrane protein with EGF-like and two follistatin-like domains 1                                      | 1.07  | 3.26E-04 | 2.88E-02 |
| Ttyh2         | tweety family member 2                                                                                      | 1.54  | 3.27E-04 | 2.88E-02 |
| Abhd17b       | abhydrolase domain containing 17B                                                                           | 0.89  | 3.28E-04 | 2.88E-02 |
| Tesk2         | testis-specific kinase 2                                                                                    | 0.95  | 3.29E-04 | 2.88E-02 |
| Paqr5         | progesterone and adiponectin receptor family member V                                                       | -0.75 | 3.30E-04 | 2.88E-02 |
| Ddc           | dopa decarboxylase                                                                                          | 1.5   | 3.31E-04 | 2.88E-02 |
| Chn2          | chimerin 2                                                                                                  | 1.19  | 3.38E-04 | 2.92E-02 |

|          |                                                                          |       |          |          |
|----------|--------------------------------------------------------------------------|-------|----------|----------|
| Uqcrc    | ubiquinol-cytochrome c reductase, complex III subunit VII                | -0.55 | 3.43E-04 | 2.95E-02 |
| Mindy1   | MINDY lysine 48 deubiquitinase 1                                         | 0.9   | 3.44E-04 | 2.95E-02 |
| Depdc1b  | DEP domain containing 1B                                                 | 1.3   | 3.47E-04 | 2.97E-02 |
| Larp6    | La ribonucleoprotein domain family, member 6                             | 0.84  | 3.51E-04 | 2.98E-02 |
| Wnk1     | WNK lysine deficient protein kinase 1                                    | 1.04  | 3.59E-04 | 3.03E-02 |
| Wfdc18   | WAP four-disulfide core domain 18                                        | 1.47  | 3.69E-04 | 3.09E-02 |
| Atp8a1   | ATPase, aminophospholipid transporter (APLT), class I, type 8A, member 1 | 0.66  | 3.70E-04 | 3.09E-02 |
| Smtnl2   | smoothenin-like 2                                                        | 1.2   | 3.73E-04 | 3.11E-02 |
| Cth      | cystathionase (cystathionine gamma-lyase)                                | -0.79 | 3.82E-04 | 3.15E-02 |
| Hsf5     | heat shock transcription factor family member 5                          | 0.65  | 3.82E-04 | 3.15E-02 |
| Slc44a1  | solute carrier family 44, member 1                                       | 2.2   | 3.83E-04 | 3.15E-02 |
| Sez6l2   | seizure related 6 homolog like 2                                         | 0.97  | 3.85E-04 | 3.15E-02 |
| Ccdc13   | coiled-coil domain containing 13                                         | 1.37  | 3.87E-04 | 3.16E-02 |
| Ccnj1    | cyclin J-like                                                            | 1.1   | 3.91E-04 | 3.17E-02 |
| Eda2r    | ectodysplasin A2 receptor                                                | -0.51 | 3.91E-04 | 3.17E-02 |
| Rnf43    | ring finger protein 43                                                   | 1.11  | 3.94E-04 | 3.18E-02 |
| Klk6     | kallikrein related-peptidase 6                                           | 2.25  | 4.02E-04 | 3.19E-02 |
| Fdps     | farnesyl diphosphate synthetase                                          | 1.07  | 4.02E-04 | 3.19E-02 |
| Prima1   | proline rich membrane anchor 1                                           | 1.21  | 4.03E-04 | 3.19E-02 |
| Efcab14  | EF-hand calcium binding domain 14                                        | 0.89  | 4.03E-04 | 3.19E-02 |
| Mbp      | myelin basic protein                                                     | 3     | 4.08E-04 | 3.22E-02 |
| Mvd      | mevalonate (diphospho) decarboxylase                                     | 1.05  | 4.09E-04 | 3.22E-02 |
| Fdft1    | farnesyl diphosphate farnesyl transferase 1                              | 0.86  | 4.15E-04 | 3.26E-02 |
| Kif13a   | kinesin family member 13A                                                | 1.19  | 4.21E-04 | 3.30E-02 |
| Prrgl    | proline rich Gla (G-carboxyglutamic acid) 1                              | 1.66  | 4.23E-04 | 3.30E-02 |
| Sccpdh   | saccharopine dehydrogenase (putative)                                    | 1.11  | 4.27E-04 | 3.32E-02 |
| Arrdc3   | arrestin domain containing 3                                             | 1.38  | 4.29E-04 | 3.32E-02 |
| Emilin3  | elastin microfibril interfacer 3                                         | 1.05  | 4.30E-04 | 3.32E-02 |
| Shisa4   | shisa family member 4                                                    | 0.89  | 4.35E-04 | 3.33E-02 |
| Sesn2    | sestrin 2                                                                | -1.49 | 4.37E-04 | 3.33E-02 |
| Arhgef28 | Rho guanine nucleotide exchange factor (GEF) 28                          | 0.94  | 4.45E-04 | 3.36E-02 |
| Plcl1    | phospholipase C-like 1                                                   | 1.05  | 4.45E-04 | 3.36E-02 |
| Slain1   | SLAIN motif family, member 1                                             | 1.47  | 4.48E-04 | 3.36E-02 |
| Tmcc3    | transmembrane and coiled coil domains 3                                  | 1.58  | 4.60E-04 | 3.41E-02 |
| Rnf7     | ring finger protein 7                                                    | 0.85  | 4.60E-04 | 3.41E-02 |
| Septin9  | septin 9                                                                 | -0.78 | 4.61E-04 | 3.41E-02 |
| Sirt2    | sirtuin 2                                                                | 1.32  | 4.66E-04 | 3.41E-02 |
| Syt11    | synaptotagmin XI                                                         | 0.6   | 4.66E-04 | 3.41E-02 |

|               |                                                                 |       |          |          |
|---------------|-----------------------------------------------------------------|-------|----------|----------|
| Pip5k1b       | phosphatidylinositol-4-phosphate5-kinase, type 1 beta           | -0.86 | 4.70E-04 | 3.41E-02 |
| Scd1          | stearoyl-Coenzyme A desaturase 1                                | 1.43  | 4.74E-04 | 3.43E-02 |
| Ptpdc1        | protein tyrosine phosphatasedomain containing 1                 | 0.94  | 4.79E-04 | 3.45E-02 |
| Hsd17b7       | hydroxysteroid (17-beta) dehydrogenase 7                        | 0.7   | 4.84E-04 | 3.47E-02 |
| Cryab         | crystallin, alpha B                                             | 1.85  | 4.88E-04 | 3.47E-02 |
| Ankrd13a      | ankyrin repeat domain 13a                                       | 0.94  | 4.88E-04 | 3.47E-02 |
| Aplp1         | amyloid beta (A4) precursor-like protein 1                      | 0.95  | 4.89E-04 | 3.47E-02 |
| Fbln5         | fibulin 5                                                       | -0.96 | 4.92E-04 | 3.48E-02 |
| Zdhhc20       | zinc finger, DHHC domain containing 20                          | 0.84  | 5.00E-04 | 3.51E-02 |
| Fkbp5         | FK506 binding protein 5                                         | -0.69 | 5.02E-04 | 3.51E-02 |
| Nectin4       | nectin cell adhesion molecule 4                                 | 1.37  | 5.12E-04 | 3.56E-02 |
| Golga7        | golgi autoantigen, golgin subfamily a, 7                        | 1.19  | 5.16E-04 | 3.58E-02 |
| Lgi3          | leucine-rich repeat LGI family, member 3                        | 1.66  | 5.19E-04 | 3.59E-02 |
| Adamts1       | ADAMTS-like 1                                                   | 0.5   | 5.38E-04 | 3.70E-02 |
| 1500015L24Rik | RIKEN cDNA 1500015L24 gene                                      | 1.02  | 5.39E-04 | 3.70E-02 |
| Ldlrad4       | low density lipoprotein receptorclass A domain containing 4     | 0.77  | 5.50E-04 | 3.76E-02 |
| Rab33a        | RAB33A, member RAS oncogene family                              | 0.74  | 5.55E-04 | 3.79E-02 |
| Emb           | embigin                                                         | -0.79 | 5.62E-04 | 3.83E-02 |
| Tmem88b       | transmembrane protein 88B                                       | 2.4   | 5.67E-04 | 3.84E-02 |
| D630028G08Rik | RIKEN cDNA D630028G08 gene                                      | 0.6   | 5.68E-04 | 3.84E-02 |
| Vmp1          | vacuole membrane protein 1                                      | 1.92  | 5.89E-04 | 3.97E-02 |
| Slc22a23      | solute carrier family 22, member 23                             | 0.61  | 5.97E-04 | 4.01E-02 |
| Efhd1         | EF hand domain containing 1                                     | 2.15  | 6.01E-04 | 4.03E-02 |
| Apbb2         | amyloid beta (A4) precursor protein-binding, family B, member 2 | 0.56  | 6.05E-04 | 4.05E-02 |
| Cep97         | centrosomal protein 97                                          | 0.92  | 6.07E-04 | 4.05E-02 |
| Il33          | interleukin 33                                                  | 2.42  | 6.14E-04 | 4.07E-02 |
| Qdpr          | quinoid dihydropteridine reductase                              | 2.45  | 6.20E-04 | 4.10E-02 |
| Fam222a       | family with sequence similarity 222, member A                   | 1.56  | 6.27E-04 | 4.14E-02 |
| Tppp3         | tubulin polymerization-promotingprotein family member 3         | 2.06  | 6.34E-04 | 4.16E-02 |
| Gjc2          | gap junction protein, gamma 2                                   | 1.34  | 6.38E-04 | 4.17E-02 |
| Ermp1         | endoplasmic reticulum metalloproteinase 1                       | 1.09  | 6.39E-04 | 4.17E-02 |
| Snx15         | sorting nexin 15                                                | 0.79  | 6.48E-04 | 4.20E-02 |
| Prr18         | proline rich 18                                                 | 3.17  | 6.48E-04 | 4.20E-02 |
| Usp30         | ubiquitin specific peptidase 30                                 | 0.81  | 6.53E-04 | 4.22E-02 |
| Sik1          | salt inducible kinase 1                                         | 0.82  | 6.56E-04 | 4.23E-02 |
| Plk3          | polo like kinase 3                                              | 0.84  | 6.58E-04 | 4.23E-02 |

|               |                                                                   |       |          |          |
|---------------|-------------------------------------------------------------------|-------|----------|----------|
| Cyth1         | cytohesin 1                                                       | 0.89  | 6.60E-04 | 4.23E-02 |
| Tmem163       | transmembrane protein 163                                         | 1.26  | 6.69E-04 | 4.25E-02 |
| Serpinb1c     | serine (or cysteine) peptidase inhibitor, clade B, member 1c      | 1     | 6.74E-04 | 4.25E-02 |
| Pkp2          | plakophilin 2                                                     | -1.26 | 6.76E-04 | 4.25E-02 |
| Ipo13         | importin 13                                                       | 0.64  | 6.76E-04 | 4.25E-02 |
| Tnfaip6       | tumor necrosis factor alpha induced protein 6                     | 1.87  | 6.78E-04 | 4.25E-02 |
| Nkain1        | Na <sup>+</sup> /K <sup>+</sup> transporting ATPase interacting 1 | 1.78  | 6.79E-04 | 4.25E-02 |
| Prkcq         | protein kinase C, theta                                           | 1.66  | 6.80E-04 | 4.25E-02 |
| Carhsp1       | calcium regulated heat stable protein 1                           | 1.78  | 6.88E-04 | 4.28E-02 |
| Sstr3         | somatostatin receptor 3                                           | 0.54  | 6.89E-04 | 4.28E-02 |
| Nfe2l3        | nuclear factor, erythroid derived 2, like 3                       | 1.03  | 6.91E-04 | 4.28E-02 |
| 5031410I06Rik | RIKEN cDNA 5031410I06 gene                                        | 1.02  | 6.98E-04 | 4.30E-02 |
| Gm32450       | predicted gene, 32450                                             | 0.67  | 7.03E-04 | 4.32E-02 |
| Rtn4          | reticulon 4                                                       | 0.73  | 7.07E-04 | 4.33E-02 |
| Slc45a3       | solute carrier family 45, member 3                                | 0.61  | 7.28E-04 | 4.42E-02 |
| Lrrn1         | leucine rich repeat protein 1, neuronal                           | 1.32  | 7.30E-04 | 4.42E-02 |
| Cst3          | cystatin C                                                        | -0.71 | 7.40E-04 | 4.45E-02 |
| Degs1         | delta(4)-desaturase, sphingolipid 1                               | 0.75  | 7.42E-04 | 4.45E-02 |
| Trim59        | tripartite motif-containing 59                                    | 1.36  | 7.43E-04 | 4.45E-02 |
| Bicd2         | BICD cargo adaptor 2                                              | 0.76  | 7.45E-04 | 4.45E-02 |
| E130308A19Rik | RIKEN cDNA E130308A19 gene                                        | 1.25  | 7.51E-04 | 4.47E-02 |
| Bfsp2         | beaded filament structural protein 2, phakinin                    | 1.41  | 7.60E-04 | 4.51E-02 |
| Serinc5       | serine incorporator 5                                             | 1.32  | 7.62E-04 | 4.51E-02 |
| P3h4          | prolyl 3-hydroxylase family member 4 (non-enzymatic)              | 1.02  | 7.72E-04 | 4.56E-02 |
| Lbr           | lamin B receptor                                                  | 0.84  | 7.75E-04 | 4.57E-02 |
| Adgrv1        | adhesion G protein-coupled receptor V1                            | 1.06  | 7.79E-04 | 4.57E-02 |
| Enpp2         | ectonucleotide pyrophosphatase/phosphodiesterase 2                | 0.91  | 7.80E-04 | 4.57E-02 |
| Pck2          | phosphoenolpyruvate carboxykinase 2 (mitochondrial)               | -0.7  | 7.87E-04 | 4.61E-02 |
| Ldlrap1       | low density lipoprotein receptoradaptor protein 1                 | 1.08  | 7.93E-04 | 4.62E-02 |
| Ly6e          | lymphocyte antigen 6 complex, locus E                             | -0.94 | 7.95E-04 | 4.62E-02 |
| Gal3st1       | galactose-3-O-sulfotransferase 1                                  | 1.95  | 8.02E-04 | 4.63E-02 |
| Rps18         | ribosomal protein S18                                             | -0.51 | 8.02E-04 | 4.63E-02 |
| Reep3         | receptor accessory protein 3                                      | 1     | 8.18E-04 | 4.68E-02 |
| Rnf141        | ring finger protein 141                                           | 0.69  | 8.22E-04 | 4.69E-02 |
| Acs1l         | acyl-CoA synthetase long-chain family member 1                    | 0.66  | 8.23E-04 | 4.69E-02 |
| Fah           | fumarylacetoacetate hydrolase                                     | 1.42  | 8.26E-04 | 4.70E-02 |

|        |                                              |      |          |          |
|--------|----------------------------------------------|------|----------|----------|
| Card19 | caspase recruitment domain family, member 19 | 1.08 | 8.62E-04 | 4.87E-02 |
| Gpr37  | G protein-coupled receptor 37                | 1.86 | 8.75E-04 | 4.93E-02 |

**Table S13.** GO molecular functions of differentially expressed genes identified during remyelination compared to treatment with cuprizone for 4 weeks in *corpus callosum*.

| GO ID      | Term                                                                                                                                                          | Ontology | N     | Differentially expressed (DE) | p-value  | Adjusted p-value |
|------------|---------------------------------------------------------------------------------------------------------------------------------------------------------------|----------|-------|-------------------------------|----------|------------------|
| GO:0003824 | Catalytic activity                                                                                                                                            | MF       | 5717  | 136                           | 1.07E-11 | 1.58E-08         |
| GO:0005515 | Protein binding                                                                                                                                               | MF       | 9318  | 186                           | 8.26E-10 | 5.49E-07         |
| GO:0005488 | Binding                                                                                                                                                       | MF       | 13753 | 245                           | 3.90E-09 | 2.32E-06         |
| GO:0043167 | Ion binding                                                                                                                                                   | MF       | 5513  | 121                           | 4.81E-08 | 2.26E-05         |
| GO:0043168 | Anion binding                                                                                                                                                 | MF       | 2730  | 68                            | 1.80E-06 | 5.80E-04         |
| GO:0019899 | Enzyme binding                                                                                                                                                | MF       | 2366  | 61                            | 2.30E-06 | 6.96E-04         |
| GO:0019911 | Structural constituent of myelin sheath                                                                                                                       | MF       | 10    | 4                             | 7.51E-06 | 1.91E-03         |
| GO:0016628 | Oxidoreductase activity, acting on the CH-CH group of donors, NAD or NADP as acceptor                                                                         | MF       | 24    | 5                             | 1.81E-05 | 3.94E-03         |
| GO:0036094 | Small molecule binding                                                                                                                                        | MF       | 2432  | 58                            | 4.24E-05 | 7.80E-03         |
| GO:0033218 | Amide binding                                                                                                                                                 | MF       | 391   | 17                            | 4.35E-05 | 7.91E-03         |
| GO:0050839 | Cell adhesion molecule binding                                                                                                                                | MF       | 284   | 14                            | 5.44E-05 | 9.26E-03         |
| GO:0051020 | GTPase binding                                                                                                                                                | MF       | 523   | 20                            | 5.74E-05 | 9.60E-03         |
| GO:0070402 | NADPH binding                                                                                                                                                 | MF       | 18    | 4                             | 1.00E-04 | 1.48E-02         |
| GO:0000166 | Nucleotide binding                                                                                                                                            | MF       | 2033  | 49                            | 1.41E-04 | 1.97E-02         |
| GO:1901265 | Nucleoside phosphate binding                                                                                                                                  | MF       | 2033  | 49                            | 1.41E-04 | 1.97E-02         |
| GO:0008092 | Cytoskeletal protein binding                                                                                                                                  | MF       | 980   | 29                            | 1.41E-04 | 1.97E-02         |
| GO:0016627 | Oxidoreductase activity, acting on the CH-CH group of donors                                                                                                  | MF       | 57    | 6                             | 1.46E-04 | 2.01E-02         |
| GO:0016717 | Oxidoreductase activity, acting on paired donors, with oxidation of a pair of donors resulting in the reduction of molecular oxygen to two molecules of water | MF       | 8     | 3                             | 1.46E-04 | 2.01E-02         |
| GO:0016787 | Hydrolase activity                                                                                                                                            | MF       | 2490  | 57                            | 1.51E-04 | 2.07E-02         |
| GO:0001540 | Amyloid-beta binding                                                                                                                                          | MF       | 58    | 6                             | 1.61E-04 | 2.19E-02         |
| GO:0042277 | Peptide binding                                                                                                                                               | MF       | 318   | 14                            | 1.79E-04 | 2.37E-02         |
| GO:0004312 | Fatty acid synthase activity                                                                                                                                  | MF       | 11    | 3                             | 4.17E-04 | 4.50E-02         |
| GO:0016746 | Transferase activity, transferring acyl groups                                                                                                                | MF       | 268   | 12                            | 4.41E-04 | 4.67E-02         |

**Abbreviations:** MF, molecular function

**Table S14.** CIBERSORTx estimated cell fractions of *corpus callosum* samples.

|                       | Neuron | Astrocyte | Oligodendrocyte | Pericyte | Endothelial cell | OPC  |
|-----------------------|--------|-----------|-----------------|----------|------------------|------|
| <b>Control 1</b>      | 0.54   | 0.24      | 0.09            | 0.06     | 0.04             | 0.02 |
| <b>Control 2</b>      | 0.39   | 0.24      | 0.19            | 0.08     | 0.05             | 0.04 |
| <b>Cuprizone 1</b>    | 0.41   | 0.16      | 0.38            | 0.02     | 0.03             | 0.00 |
| <b>Cuprizone 2</b>    | 0.53   | 0.21      | 0.20            | 0.04     | 0.00             | 0.02 |
| <b>Cuprizone 3</b>    | 0.43   | 0.21      | 0.26            | 0.06     | 0.02             | 0.03 |
| <b>Mean Control</b>   | 0.47   | 0.24      | 0.14            | 0.07     | 0.05             | 0.03 |
| <b>Mean Cuprizone</b> | 0.46   | 0.19      | 0.28            | 0.04     | 0.02             | 0.02 |

**Table S15.** Pearson's correlation and root mean squared error (RMSE) between original *corpus callosum* data and the CIBERSORTx estimated mixture.

|                    | Correlation | RMSE |
|--------------------|-------------|------|
| <b>Control 1</b>   | 0.28        | 0.99 |
| <b>Control 2</b>   | 0.52        | 0.85 |
| <b>Cuprizone 1</b> | 0.46        | 0.90 |
| <b>Cuprizone 2</b> | 0.38        | 0.94 |
| <b>Cuprizone 3</b> | 0.49        | 0.87 |

**Table S16.** Potential ligands in microglia that could affect gene expression after cuprizone treatment in OPCs ordered by the Pearson correlation coefficient.

| Symbol   | Gene name                                                             |
|----------|-----------------------------------------------------------------------|
| TFPI     | Tissue factor pathway inhibitor                                       |
| SEMA4D   | Semaphorin 4D                                                         |
| GSTP1    | Glutathione S-Transferase Pi                                          |
| SERPINE2 | Serpin Family E Member 2                                              |
| LRPAP1   | Low Density Lipoprotein-Receptor Related Protein Associated Protein 1 |
| THBS1    | Thrombospondin 1                                                      |
| HSP90B1  | Heat Shock Protein 90 Beta Family Member 1                            |
| EFNB2    | Ephrin B2                                                             |
| F11R     | F11 Receptor                                                          |
| C3       | Complement C3                                                         |
| EFNB1    | Ephrin B1                                                             |
| PF4      | Platelet Factor 4                                                     |
| RGMA     | Repulsive Guidance Molecule BMP Co-Receptor A                         |
| LIPH     | Lipase H                                                              |
| ARF1     | ADP Ribosylation Factor 1                                             |
| SERPINE1 | Serpin Family E Member 1                                              |
| PROS1    | Protein S                                                             |
| GAS6     | Growth Arrest Specific 6                                              |
| ADAM9    | ADAM Metallopeptidase Domain 9                                        |
| DUSP18   | Dual Specificity Phosphatase 18                                       |
| JAM2     | Junctional Adhesion Molecule 2                                        |
| CORT     | Cortistatin                                                           |
| VCAM1    | Vascular Cell Adhesion Molecule 1                                     |
| ADAM15   | ADAM Metallopeptidase Domain 15                                       |
| PTPRC    | Protein Tyrosine Phosphatase Receptor Type C                          |
| COL2A1   | Collagen Type II Alpha 1 Chain                                        |
| CSF1     | Colony Stimulating Factor 1                                           |
| PSAP     | Prosaposin                                                            |

|        |                                      |
|--------|--------------------------------------|
| CLCF1  | Cardiotrophin Like Cytokine Factor 1 |
| TNFSF9 | TNF Superfamily Member 9             |
| ADAM17 | ADAM Metallopeptidase Domain 17      |
| FN1    | Fibronectin 1                        |
| BMP2   | Bone Morphogenetic Protein 2         |
| PLAU   | Plasminogen Activator, Urokinase     |
| SPP1   | Secreted Phosphoprotein 1            |
| LRRC4B | Leucine Rich Repeat Containing 4B    |
| VEGFA  | Vascular Endothelial Growth Factor A |
| OSM    | Oncostatin M                         |
| IFNA5  | Interferon Alpha 5                   |
| IHH    | Indian Hedgehog Signaling Molecule   |
| IL6    | Interleukin 6                        |
| APOE   | Apolipoprotein E                     |
| IL15   | Interleukin 15                       |
| NPNT   | Nephronectin                         |
| TNF    | Tumor Necrosis Factor                |
| IGF1   | Insulin Like Growth Factor 1         |
| CADM1  | Cell Adhesion Molecule 1             |

**Table S17.** Mean expression and adjusted p-value of differential expressed ligands in microglia from control and cuprizone-treated mice.

| Ligand | Name                             | Mean expression in microglia from control mice | Mean expression in microglia from cuprizone-treated mice | Fold change | Adjusted p-value |
|--------|----------------------------------|------------------------------------------------|----------------------------------------------------------|-------------|------------------|
| PLAU   | Plasminogen activator, urokinase | 8.69                                           | 9.67                                                     | 1.94        | 0.052            |
| SPP1   | Secreted phosphoprotein 1        | 5.06                                           | 9.84                                                     | 1.11        | 0.052            |

**Table S18.** Mean expression and adjusted p-value of differential expressed receptors in oligodendrocyte progenitor cells from control and cuprizone-treated mice.

| Receptor | Name                                                 | Mean expression in OPCs from control mice | Mean expression in OPCs from cuprizone-treated mice | Fold change | Adjusted p-value |
|----------|------------------------------------------------------|-------------------------------------------|-----------------------------------------------------|-------------|------------------|
| Jam3     | junction adhesion molecule 3                         | 15.63                                     | 14.65                                               | 0.94        | 5.69e-05         |
| Plxnb2   | plexin B2                                            | 11.21                                     | 12.53                                               | 1.12        | 4.28e-03         |
| Hhip     | Hedgehog-interacting protein                         | 14.11                                     | 12.72                                               | 0.90        | 4.28e-03         |
| Tnfrsf1a | tumor necrosis factor receptorsuperfamily, member 1a | 9.44                                      | 11.09                                               | 1.17        | 6.06e-03         |
| Acvr1    | activin A receptor, type 1                           | 12.40                                     | 13.27                                               | 1.07        | 6.06e-03         |
| Ldlr     | low density lipoprotein receptor                     | 12.66                                     | 11.05                                               | 0.87        | 7.19e-03         |
| Fgfr2    | fibroblast growth factor receptor 2                  | 11.40                                     | 10.09                                               | 0.89        | 8.94e-03         |
| Itgb4    | integrin beta 4                                      | 14.62                                     | 12.61                                               | 0.86        | 8.94e-03         |
| Ephb1    | Eph receptor B1                                      | 14.38                                     | 13.59                                               | 0.94        | 1.23e-02         |
| Lrp1     | low density lipoprotein receptor-related protein 1   | 10.34                                     | 12.00                                               | 1.16        | 2.06e-02         |
| Lpar1    | lysophosphatidic acid receptor 1                     | 12.06                                     | 10.77                                               | 0.89        | 2.12e-02         |
| Tyro3    | TYRO3 protein tyrosine kinase 3                      | 11.69                                     | 10.51                                               | 0.90        | 3.22e-02         |

|       |                                                            |       |           |      |          |
|-------|------------------------------------------------------------|-------|-----------|------|----------|
| Itgb5 | integrin beta 5                                            | 11.37 | 12.1<br>1 | 1.07 | 3.22e-02 |
| Axl   | AXL receptor tyrosine kinase                               | 9.21  | 11.6<br>1 | 1.26 | 4.76e-02 |
| Sorl1 | sortilin-related receptor, LDLR class A repeats-containing | 13.39 | 11.8<br>5 | 0.88 | 4.76e-02 |

**Table S19.** Mean expression and adjusted p-value of differentially expressed target genes in oligodendrocyte progenitor cells from control and cuprizone-treated mice.

| Target    | Name                                                      | Mean expression in OPCs from control mice | Mean expression in OPCs from cuprizone treated mice | Fold change | Adjusted p-value |
|-----------|-----------------------------------------------------------|-------------------------------------------|-----------------------------------------------------|-------------|------------------|
| Gadd45b   | growth arrest and DNA-damage-inducible 45 beta            | 10.84                                     | 14.51                                               | 1.34        | 3.32e-05         |
| Hist1h3d  |                                                           | 13.77                                     | 15.55                                               | 1.13        | 3.32e-05         |
| Bbc3      | BCL2 binding component 3                                  | 11.33                                     | 14.24                                               | 1.26        | 3.61e-05         |
| Tnfrsf12a | tumor necrosis factor receptorsuperfamily, member 12a     | 9.82                                      | 13.34                                               | 1.36        | 7.25e-05         |
| Cdkn1a    | cyclin-dependent kinase inhibitor 1A(P21)                 | 9.30                                      | 15.17                                               | 1.63        | 1.07e-04         |
| Fosb      | FBJ osteosarcoma oncogene B                               | 11.78                                     | 14.32                                               | 1.22        | 1.38e-04         |
| Abca1     | ATP-binding cassette, sub-family A(ABC1), member 1        | 11.16                                     | 13.40                                               | 1.20        | 2.10e-04         |
| Fam181b   | family with sequence similarity 181,member B              | 8.80                                      | 12.59                                               | 1.43        | 2.10e-04         |
| Vgf       | VGF nerve growth factor inducible                         | 8.98                                      | 11.80                                               | 1.31        | 5.08e-04         |
| Klf4      | Kruppel-like factor 4 (gut)                               | 11.08                                     | 14.15                                               | 1.28        | 5.08e-04         |
| Kdr       | kinase insert domain protein receptor                     | 10.76                                     | 8.99                                                | 0.84        | 5.08e-04         |
| Gstp1     | glutathione S-transferase, pi 1                           | 15.01                                     | 14.19                                               | 0.94        | 6.83e-04         |
| Hexim1    | hexamethylene bis-acetamideinducible 1                    | 10.37                                     | 11.92                                               | 1.15        | 7.02e-04         |
| Trim47    | tripartite motif-containing 47                            | 10.00                                     | 12.24                                               | 1.22        | 7.02e-04         |
| Egr2      | early growth response 2                                   | 10.38                                     | 12.85                                               | 1.24        | 7.45e-04         |
| Sgk2      | serum/glucocorticoid regulated kinase2                    | 14.82                                     | 12.16                                               | 0.82        | 7.79e-04         |
| Ccnd1     | cyclin D1                                                 | 9.92                                      | 13.32                                               | 1.34        | 8.81e-04         |
| Il18      | interleukin 18                                            | 13.55                                     | 12.34                                               | 0.91        | 1.00e-03         |
| Hmga1     | high mobility group AT-hook 1                             | 12.84                                     | 15.50                                               | 1.21        | 1.40e-03         |
| Ppp1r15a  | protein phosphatase 1, regulatorysubunit 15A              | 12.47                                     | 15.43                                               | 1.24        | 1.40e-03         |
| Dusp1     | dual specificity phosphatase 1                            | 11.41                                     | 13.23                                               | 1.16        | 1.57e-03         |
| Egr1      | early growth response 1                                   | 13.21                                     | 15.70                                               | 1.19        | 1.57e-03         |
| Gadd45g   | growth arrest and DNA-damage-inducible 45 gamma           | 11.15                                     | 15.24                                               | 1.37        | 1.57e-03         |
| Chpf      | chondroitin polymerizing factor                           | 11.33                                     | 12.92                                               | 1.14        | 1.57e-03         |
| Rab37     | RAB37, member RAS oncogenefamily                          | 11.40                                     | 10.28                                               | 0.90        | 1.57e-03         |
| Adamtsl4  | ADAMTS-like 4                                             | 14.13                                     | 11.65                                               | 0.82        | 1.57e-03         |
| Pdgfra    | platelet derived growth factorreceptor, alpha polypeptide | 9.35                                      | 10.82                                               | 1.16        | 1.57e-03         |
| Cntf      | ciliary neurotrophic factor                               | 10.32                                     | 12.01                                               | 1.16        | 1.57e-03         |
| C1qc      | complement component 1, qsubcomponent, C chain            | 9.57                                      | 12.34                                               | 1.29        | 1.57e-03         |
| Hmgcs1    | 3-hydroxy-3-methylglutaryl-Coenzyme A synthase 1          | 15.24                                     | 13.50                                               | 0.89        | 1.63e-03         |
| Itih3     | inter-alpha trypsin inhibitor, heavychain 3               | 13.02                                     | 10.49                                               | 0.81        | 1.66e-03         |
| Smad7     | SMAD family member 7                                      | 13.14                                     | 11.94                                               | 0.91        | 1.75e-03         |
| Nfil3     | nuclear factor, interleukin 3, regulated                  | 11.65                                     | 13.75                                               | 1.18        | 1.85e-03         |
| Midn      | midnolin                                                  | 9.99                                      | 12.55                                               | 1.26        | 1.95e-03         |
| Vim       | vimentin                                                  | 10.19                                     | 13.81                                               | 1.36        | 1.99e-03         |

|           |                                                                                    |       |       |      |          |
|-----------|------------------------------------------------------------------------------------|-------|-------|------|----------|
| Tnfrsf1a  | tumor necrosis factor receptorsuperfamily, member 1a                               | 9.44  | 11.09 | 1.17 | 2.19e-03 |
| Nrcam     | neuronal cell adhesion molecule                                                    | 10.02 | 12.56 | 1.25 | 2.29e-03 |
| Dhrs3     | dehydrogenase/reductase (SDRfamily) member 3                                       | 10.19 | 11.60 | 1.14 | 2.60e-03 |
| Traf4     | TNF receptor associated factor 4                                                   | 9.68  | 12.26 | 1.27 | 2.63e-03 |
| Cdh13     | cadherin 13                                                                        | 9.18  | 12.09 | 1.32 | 2.63e-03 |
| Ldlr      | low density lipoprotein receptor                                                   | 12.66 | 11.05 | 0.87 | 2.81e-03 |
| S100a10   | S100 calcium binding protein A10 (calpactin)                                       | 9.46  | 12.25 | 1.30 | 2.86e-03 |
| Pcdhga9   | protocadherin gamma subfamily A, 9                                                 | 10.71 | 11.93 | 1.11 | 2.96e-03 |
| Klf6      | Kruppel-like factor 6                                                              | 12.88 | 14.53 | 1.13 | 3.03e-03 |
| Atf4      | activating transcription factor 4                                                  | 10.68 | 12.04 | 1.13 | 3.03e-03 |
| Serpind1  | serine (or cysteine) peptidase inhibitor, clade D, member 1                        | 12.36 | 10.60 | 0.86 | 3.10e-03 |
| Timp3     | tissue inhibitor of metalloproteinase 3                                            | 10.82 | 13.12 | 1.21 | 3.10e-03 |
| Hist1h2ag |                                                                                    | 13.02 | 15.17 | 1.16 | 4.15e-03 |
| Tsc22d3   | TSC22 domain family, member 3                                                      | 14.90 | 13.33 | 0.89 | 4.98e-03 |
| Lmna      | lamin A                                                                            | 12.29 | 14.20 | 1.16 | 5.01e-03 |
| Gdf15     | growth differentiation factor 15                                                   | 8.91  | 14.19 | 1.59 | 5.01e-03 |
| Odc1      | ornithine decarboxylase, structural 1                                              | 11.01 | 12.66 | 1.15 | 5.01e-03 |
| Bax       | BCL2-associated X protein                                                          | 13.11 | 14.07 | 1.07 | 5.01e-03 |
| Rps19     | ribosomal protein S19                                                              | 13.44 | 15.06 | 1.12 | 5.01e-03 |
| Socs3     | suppressor of cytokine signaling 3                                                 | 11.13 | 14.29 | 1.28 | 5.05e-03 |
| Synpo     | synaptopodin                                                                       | 12.27 | 11.25 | 0.92 | 5.19e-03 |
| Klf10     | Kruppel-like factor 10                                                             | 10.07 | 11.65 | 1.16 | 6.18e-03 |
| Ddc       | dopa decarboxylase                                                                 | 13.71 | 12.80 | 0.93 | 6.18e-03 |
| Cdk5r1    | cyclin-dependent kinase 5, regulatory subunit 1 (p35)                              | 10.93 | 12.01 | 1.10 | 8.98e-03 |
| Lrp1      | low density lipoprotein receptor-related protein 1                                 | 10.34 | 12.00 | 1.16 | 9.07e-03 |
| Plin4     | perilipin 4                                                                        | 11.79 | 13.36 | 1.13 | 9.07e-03 |
| Ifit3     | interferon-induced protein with tetratricopeptide repeats 3                        | 9.33  | 11.03 | 1.18 | 9.17e-03 |
| Myh9      | myosin, heavy polypeptide 9, non-muscle                                            | 12.76 | 13.59 | 1.06 | 9.36e-03 |
| Fos       | FBJ osteosarcoma oncogene                                                          | 12.59 | 14.95 | 1.19 | 9.80e-03 |
| Ank3      | ankyrin 3, epithelial                                                              | 11.95 | 10.80 | 0.90 | 9.80e-03 |
| Apln      | apelin                                                                             | 12.35 | 11.03 | 0.89 | 9.80e-03 |
| Per1      | period circadian clock 1                                                           | 12.20 | 14.41 | 1.18 | 1.00e-02 |
| Tle3      | transducin-like enhancer of split 3                                                | 13.65 | 14.54 | 1.07 | 1.00e-02 |
| Tap2      | transporter 2, ATP-binding cassette, sub-family B (MDR/TAP)                        | 10.53 | 12.63 | 1.20 | 1.09e-02 |
| Atf3      | activating transcription factor 3                                                  | 9.71  | 13.05 | 1.34 | 1.19e-02 |
| Zfp36l1   | zinc finger protein 36, C3H type-like 1                                            | 9.79  | 11.55 | 1.18 | 1.19e-02 |
| Csrnp1    | cysteine-serine-rich nuclear protein 1                                             | 11.70 | 12.93 | 1.11 | 1.19e-02 |
| C4b       | complement component 4B (Chido blood group)                                        | 13.80 | 15.89 | 1.15 | 1.19e-02 |
| Cdk18     | cyclin-dependent kinase 18                                                         | 15.67 | 14.68 | 0.94 | 1.29e-02 |
| Crybg3    | beta-gamma crystallin domain containing 3                                          | 12.51 | 11.29 | 0.90 | 1.36e-02 |
| Cebpb     | CCAAT/enhancer binding protein (C/EBP), beta                                       | 9.61  | 12.35 | 1.28 | 1.41e-02 |
| Hist1h4d  |                                                                                    | 11.42 | 13.42 | 1.17 | 1.50e-02 |
| Olig2     | oligodendrocyte transcription factor 2                                             | 13.02 | 13.99 | 1.07 | 1.50e-02 |
| Stat3     | signal transducer and activator of transcription 3                                 | 12.83 | 13.59 | 1.06 | 1.76e-02 |
| Sgk1      | serum/glucocorticoid regulated kinase 1                                            | 13.72 | 15.42 | 1.12 | 1.80e-02 |
| Nfkbia    | nuclear factor of kappa light polypeptide gene enhancer in B cellsinhibitor, alpha | 13.02 | 14.38 | 1.10 | 1.83e-02 |
| Rab34     | RAB34, member RAS oncogene family                                                  | 10.57 | 12.47 | 1.18 | 1.90e-02 |
| Cd44      | CD44 antigen                                                                       | 9.51  | 10.83 | 1.14 | 1.90e-02 |
| Anxa2     | annexin A2                                                                         | 11.49 | 14.06 | 1.22 | 1.90e-02 |
| Colla2    | collagen, type I, alpha 2                                                          | 11.44 | 12.73 | 1.11 | 1.94e-02 |

|           |                                                                         |       |       |      |          |
|-----------|-------------------------------------------------------------------------|-------|-------|------|----------|
| Gadd45a   | growth arrest and DNA-damage-inducible 45 alpha                         | 10.56 | 12.64 | 1.20 | 2.04e-02 |
| C1qb      | complement component 1, q subcomponent, beta polypeptide                | 9.35  | 11.19 | 1.20 | 2.09e-02 |
| Tgif1     | TGFB-induced factor homeobox 1                                          | 8.84  | 12.71 | 1.44 | 2.14e-02 |
| Spp1      | secreted phosphoprotein 1                                               | 9.26  | 10.42 | 1.13 | 2.23e-02 |
| Bcl6      | B cell leukemia/lymphoma 6                                              | 12.51 | 13.62 | 1.09 | 2.30e-02 |
| Mfge8     | milk fat globule-EGF factor 8 protein                                   | 13.48 | 14.49 | 1.07 | 2.48e-02 |
| Arhgef10l | Rho guanine nucleotide exchange factor (GEF) 10-like                    | 9.48  | 11.96 | 1.26 | 2.59e-02 |
| Reep1     | receptor accessory protein 1                                            | 9.76  | 10.99 | 1.13 | 2.59e-02 |
| Ddit4     | DNA-damage-inducible transcript 4                                       | 14.37 | 15.55 | 1.08 | 2.64e-02 |
| Csf1r     | colony stimulating factor 1 receptor                                    | 11.50 | 13.92 | 1.21 | 2.67e-02 |
| Trib1     | tribbles pseudokinase 1                                                 | 8.13  | 11.74 | 1.44 | 2.93e-02 |
| Tnfrsf3   | tumor necrosis factor, alpha-induced protein 3                          | 8.94  | 11.00 | 1.23 | 2.97e-02 |
| Cirbp     | cold inducible RNA binding protein                                      | 12.46 | 14.16 | 1.14 | 2.97e-02 |
| Npepps    | aminopeptidase puromycin sensitive                                      | 14.04 | 13.24 | 0.94 | 2.97e-02 |
| Jun       | jun proto-oncogene                                                      | 14.96 | 15.97 | 1.07 | 3.20e-02 |
| Ly86      | lymphocyte antigen 86                                                   | 7.52  | 12.08 | 1.61 | 3.48e-02 |
| Mgp       | matrix Gla protein                                                      | 12.43 | 14.42 | 1.16 | 3.67e-02 |
| Malat1    | metastasis associated lung adenocarcinoma transcript 1 (non-coding RNA) | 12.95 | 14.16 | 1.09 | 4.04e-02 |
| Zeb2      | zinc finger E-box binding homeobox 2                                    | 10.72 | 9.59  | 0.89 | 4.04e-02 |
| Clic1     | chloride intracellular channel 1                                        | 10.10 | 12.23 | 1.21 | 4.26e-02 |
| Vcan      | versican                                                                | 8.95  | 11.37 | 1.27 | 4.37e-02 |
| Magi1     | membrane associated guanylatekinase, WW and PDZ domain containing 1     | 13.71 | 12.88 | 0.94 | 4.73e-02 |
